# Supplementary material for: The accuracy of Fiber-Optic Raman Spectroscopy in the detection and diagnosis of head and neck neoplasm in vivo: a systematic review and meta-analysis
Source: PeerJ. 2023 Dec 11;11:e16536. doi: 10.7717/peerj.16536 (PMC10720414; doi:10.7717/peerj.16536)
Supplement: Supplemental Information 2 [file peerj-11-16536-s002.doc]

Database: Embase <1974 to 2023 March 17>

Search Strategy:

--------------------------------------------------------------------------------

1 (head and neck neoplasms).mp. [mp=title, abstract, heading word, drug trade name, original title, device manufacturer, drug manufacturer, device trade name, keyword heading word, floating subheading word, candidate term word] (4215)

2 Facial Neoplasms.mp. or face tumor/ (3403)

3 Eyelid Neoplasms.mp. or eyelid tumor/ (3017)

4 Mouth Neoplasms.mp. or mouth tumor/ (15555)

5 Gingival Neoplasms.mp. or gingiva tumor/ (1961)

6 Leukoplakia, Oral.mp. or oral leukoplakia/ (347)

7 Leukoplakia, Hairy.mp. or hairy leukoplakia/ (260)

8 Lip Neoplasms.mp. or lip tumor/ (1656)

9 Palatal Neoplasms.mp. or jaw tumor/ (4051)

10 Salivary Gland Neoplasms.mp. or salivary gland tumor/ (8685)

11 Parotid Neoplasms.mp. or parotid gland tumor/ (6638)

12 Sublingual Gland Neoplasms.mp. or salivary gland tumor/ (7929)

13 Submandibular Gland Neoplasms.mp. or salivary gland tumor/ (7944)

14 Tongue Neoplasms.mp. or tongue tumor/ (4599)

15 Otorhinolaryngologic Neoplasms.mp. or "head and neck tumor"/ (17295)

16 Laryngeal Neoplasms.mp. or larynx tumor/ (10462)

17 Nose Neoplasms.mp. or nose tumor/ (5257)

18 Paranasal Sinus Neoplasms.mp. or paranasal sinus tumor/ (3678)

19 Maxillary Sinus Neoplasms.mp. or maxillary sinus tumor/ (122)

20 Pharyngeal Neoplasms.mp. or pharynx cancer/ (5206)

21 Hypopharyngeal Neoplasms.mp. or hypopharynx tumor/ (1475)

22 Nasopharyngeal Neoplasms.mp. or nasopharynx tumor/ (6000)

23 Nasopharyngeal Carcinoma.mp. or nasopharynx carcinoma/ (24623)

24 Oropharyngeal Neoplasms.mp. or oropharynx tumor/ (2569)

25 Tonsillar Neoplasms.mp. or tonsil tumor/ (954)

26 Parathyroid Neoplasms.mp. or parathyroid tumor/ (3062)

27 (Squamous Cell Carcinoma of Head and Neck).mp. [mp=title, abstract, heading word, drug trade name, original title, device manufacturer, drug manufacturer, device trade name, keyword heading word, floating subheading word, candidate term word] (955)

28 Thyroid Neoplasms.mp. or thyroid tumor/ (18693)

29 Thyroid Cancer, Papillary.mp. or thyroid papillary carcinoma/ (19069)

30 Thyroid Nodule.mp. or thyroid nodule/ (20027)

31 Tracheal Neoplasms.mp. or trachea tumor/ (2366)

32 (Neoplasms, Head and Neck).mp. [mp=title, abstract, heading word, drug trade name, original title, device manufacturer, drug manufacturer, device trade name, keyword heading word, floating subheading word, candidate term word] (18)

33 Head, Neck Neoplasms.mp. (25)

34 (Cancer of Head and Neck).mp. [mp=title, abstract, heading word, drug trade name, original title, device manufacturer, drug manufacturer, device trade name, keyword heading word, floating subheading word, candidate term word] (2062)

35 (Head and Neck Cancer).mp. [mp=title, abstract, heading word, drug trade name, original title, device manufacturer, drug manufacturer, device trade name, keyword heading word, floating subheading word, candidate term word] (74000)

36 (Cancer of the Head and Neck).mp. [mp=title, abstract, heading word, drug trade name, original title, device manufacturer, drug manufacturer, device trade name, keyword heading word, floating subheading word, candidate term word] (4669)

37 Head Neoplasms.mp. or head cancer/ (1889)

38 Neoplasms, Head.mp. (22)

39 Neck Neoplasms.mp. (4242)

40 Neoplasms, Neck.mp. (3)

41 Cancer of Head.mp. (2162)

42 Head Cancer.mp. or head cancer/ (2688)

43 Cancer of the Head.mp. (5132)

44 Cancer of Neck.mp. (230)

45 Neck Cancer.mp. or neck cancer/ (74619)

46 Cancer of the Neck.mp. (1302)

47 ((nasopharyn$ or oropharyn$ or laryn$ or glotti$ or tonsil$ or epiglotti$ or oral cavity or oral or tongue or gingiva$ or bucca$ or lip or palat$ or gum or mouth floor or floor of mouth or lingual or (head and neck) or HN) adj4 (cancer$ or tumor$ or tumor$ or neoplasm$ or carcinoma$ or squamous cell carcinoma or SCC)).mp. [mp=title, abstract, heading word, drug trade name, original title, device manufacturer, drug manufacturer, device trade name, keyword heading word, floating subheading word, candidate term word] (253682)

48 ((cancer$ or tumor$ or tumor$ or neoplasm$ or carcinoma$ or squamous cell carcinoma or SCC) adj4 (nasopharyn$ or oropharyn$ or laryn$ or glotti$ or tonsil$ or epiglotti$ or oral cavity or oral or tongue or gingiva$ or bucca$ or lip or palat$ or gum or mouth floor or floor of mouth or lingual or (head and neck) or HN)).mp. [mp=title, abstract, heading word, drug trade name, original title, device manufacturer, drug manufacturer, device trade name, keyword heading word, floating subheading word, candidate term word] (253682)

49 (HNSCC or SCCHN or HNC or OSCC or OCSCC or OPSCC or LSCC or NPC).mp. [mp=title, abstract, heading word, drug trade name, original title, device manufacturer, drug manufacturer, device trade name, keyword heading word, floating subheading word, candidate term word] (65874)

50 spectrum analysis, raman.mp. or Raman spectrometry/ (49196)

51 Raman Spectrum Analysis.mp. or Raman spectrometry/ (49187)

52 Raman Spectroscopy.mp. or Raman spectrometry/ (56785)

53 Spectroscopy, Raman.mp. (874)

54 Analysis, Raman Spectrum.mp. (1)

55 Raman Optical Activity Spectroscopy.mp. (20)

56 Raman Scattering.mp. (10842)

57 Scattering, Raman.mp. (59)

58 1 or 2 or 3 or 4 or 5 or 6 or 7 or 8 or 9 or 10 or 11 or 12 or 13 or 14 or 15 or 16 or 17 or 18 or 19 or 20 or 21 or 22 or 23 or 24 or 25 or 26 or 27 or 28 or 29 or 30 or 31 or 32 or 33 or 34 or 35 or 36 or 37 or 38 or 39 or 40 or 41 or 42 or 43 or 44 or 45 or 46 or 47 or 48 or 49 (357309)

59 50 or 51 or 52 or 53 or 54 or 55 or 56 or 57 (59079)

60 58 and 59 (383)

***************************

1.

CuO decorated vacancy-rich CeO2 nanopencils for highly efficient catalytic NO reduction by CO at low temperature.

Wang F., Yu Z., Zhai S., Li Y., Xu Y., Ye Y., Wei X., Xu J., Xue B.

Environmental science and pollution research international. 30(11) (pp 31895-31904), 2023. Date of Publication: 01 Mar 2023.

AN: 639685290

With the rapid development of transportation and vehicles, the elimination of NOx and CO has highly attracted public attention. In this work, vacancy-rich CeO2 nanopencil supported CuO catalysts (CuO/CeO2-NPC) were successfully prepared for NO reduction by CO. Importantly, CeO2 with nanopencil-like shape (CeO2-NPC) have been synthesis by solvothermal method for the first time. The physicochemical properties of all samples were studied in detail by combining the means of X-ray diffraction (XRD), Raman spectroscopy, electron paramagnetic resonance (EPR), X-ray photoelectron spectroscopy (XPS), H2-temperature-programmed reduction (H2-TPR), transmission electron microscopy (TEM), scanning electron microscopy (SEM), N2 physisorption (Brunauer-Emmett-Teller), and NO and CO temperature-programmed desorption (NO-TPD and CO-TPD) techniques. Compared with CeO2 nanorods and nanoparticles supported CuO catalysts (CuO/CeO2-NR and CuO/CeO2-NP), the CuO/CeO2-NPC catalysts showed the highest catalytic activity, affording more than 90% NO conversion at 69 degreeC as well as excellent H2O tolerance at 150 degreeC, which is superior to catalysts previously reported. Characterization results indicated that the synergistic effect between the well-dispersed CuO and the CeO2 nanopencil support enables a favorable electron transfer between these components and enhances the density of surface oxygen vacancies and Cu+ species, which consequently accelerating the redox cycle. The results indicated that the morphology control of CeO2 support could be an efficient way to evidently enhance the catalytic performance for NO+CO reaction.

Copyright © 2022. The Author(s), under exclusive licence to Springer-Verlag GmbH Germany, part of Springer Nature.

PMID

36459322 [<https://www.ncbi.nlm.nih.gov/pubmed/?term=36459322>]

Author NameID

Wang, Fei; ORCID: <https://orcid.org/0000-0003-3475-1163>

Institution

(Wang, Yu, Zhai, Li, Xu, Ye, Xu, Xue) Advanced Catalysis and Green Manufacturing Collaborative Innovation Center, School of Petrochemical and Engineering, Changzhou University, Changzhou 213164, China (Wei) School of Chemical Engineering and Materials, Changzhou Institute of Technology, Changzhou 213032, China

Publisher

NLM (Medline)

Emtree Heading

chemistry; cold; temperature; *cerium; copper; cupric oxide.

Drug Index Terms

*cerium; copper; cupric oxide.

Other Index Terms

chemistry; cold; temperature.

Link to the Ovid Full Text or citation:

[Click here for full text options](https://ovidsp.ovid.com/ovidweb.cgi?T=JS&CSC=Y&NEWS=N&PAGE=fulltext&D=emexb&AN=639685290)

Link to the External Link Resolver:

[SFX](https://sfx-86scu.hosted.exlibrisgroup.com.cn/86scu?sid=OVID:embase&id=pmid:36459322&id=doi:10.1007%2Fs11356-022-24508-1&issn=16147499&isbn=&volume=30&issue=11&spage=31895&pages=31895-31904&date=2023&title=Environmental+science+and+pollution+research+international&atitle=CuO+decorated+vacancy-rich+CeO2+nanopencils+for+highly+efficient+catalytic+NO+reduction+by+CO+at+low+temperature&aulast=Wang&pid=<author>Wang+F.%3BYu+Z.%3BZhai+S.%3BLi+Y.%3BXu+Y.%3BYe+Y.%3BWei+X.%3BXu+J.%3BXue+B.<%2Fauthor><AN>639685290<%2FAN><DT>Article<%2FDT>)

2.

Mobile multi-configuration clinical translational Raman system for oral cancer application.

Maryam S., Konugolu Venkata Sekar S., Ghauri M.D., Fahy E., Nogueira M.S., Lu H., Beffara F., Humbert G., Ni Riordain R., Sheahan P., Burke R., Wei Kho K., Gautam R., Andersson-Engels S.

The Analyst. (no pagination), 2023. Date of Publication: 10 Mar 2023.

AN: 640543061

Early diagnosis of oral cancer is critical to improve the survival rate of patients. Raman spectroscopy, a non-invasive spectroscopic technique, has shown potential in identifying early-stage oral cancer biomarkers in the oral cavity environment. However, inherently weak signals necessitate highly sensitive detectors, which restricts widespread usage due to high setup costs. In this research, the fabrication and assembly of a customised Raman system that can adapt three different configurations for the in vivo and ex vivo analysis is reported. This novel design will help in reducing the cost required to have multiple Raman instruments specific for a given application. First, we demonstrated the capability of a customized microscope for acquiring Raman signals from a single cell with high signal-to-noise ratio. Generally, when working with liquid samples with low concentration of analytes (such as saliva) under a microscope, excitation light interacts with a small sample volume, which may not be representative of whole sample. To address this issue, we have designed a novel long-path transmission set-up, which was found to be sensitive towards low concentration of analytes in aqueous solution. We further demonstrated that the same Raman system can be incorporated with the multimodal fibre optical probe to collect in vivo data from oral tissues. In summary, this flexible, portable, multi-configuration Raman system has the potential to provide a cost-effective solution for complete screening of precancer oral lesions.

PMID

36896767 [<https://www.ncbi.nlm.nih.gov/pubmed/?term=36896767>]

Author NameID

Maryam, Siddra; ORCID: <https://orcid.org/0000-0003-2644-2088> Gautam, Rekha; ORCID: <https://orcid.org/0000-0002-1176-8491>

Andersson-Engels, Stefan; ORCID: <https://orcid.org/0000-0001-5640-3122>

Institution

(Maryam) Tyndall National Institute, University College Cork, Cork, Ireland (Konugolu Venkata Sekar, Ghauri, Nogueira, Lu, Burke, Wei Kho, Gautam, Andersson-Engels) Tyndall National Institute, University College Cork, Cork, Ireland

(Fahy, Ni Riordain) Cork University Dental School and Hospital, Wilton, Cork, Ireland

(Beffara, Humbert) XLIM Research Institute, UMR 7252 CNRS/Limoges University, Limoges, France

(Ni Riordain) ENTO Research Institute, University College Cork, Cork, Ireland

(Sheahan) South Infirmary Victoria University Hospital, Cork, Ireland

Publisher

NLM (Medline)

Emtree Heading

animal experiment; animal model; animal tissue; aqueous solution; article; controlled study; ex vivo study; excitation; human; in vivo study; microscope; *mouth cancer; mouth lesion; mouth tissue; nonhuman; precancer; saliva; signal noise ratio.

Other Index Terms

animal experiment [m]; animal model [m]; animal tissue [m]; aqueous solution [m]; article [m]; controlled study [m]; ex vivo study [m]; excitation [m]; human [m]; in vivo study [m]; microscope [m]; *mouth cancer [m]; mouth lesion [m]; mouth tissue [m]; nonhuman [m]; precancer [m]; saliva [m]; signal noise ratio [m].

Link to the Ovid Full Text or citation:

[Click here for full text options](https://ovidsp.ovid.com/ovidweb.cgi?T=JS&CSC=Y&NEWS=N&PAGE=fulltext&D=emexb&AN=640543061)

Link to the External Link Resolver:

[SFX](https://sfx-86scu.hosted.exlibrisgroup.com.cn/86scu?sid=OVID:embase&id=pmid:36896767&id=doi:10.1039%2Fd2an01921c&issn=13645528&isbn=&volume=&issue=&spage=&pages=&date=2023&title=The+Analyst&atitle=Mobile+multi-configuration+clinical+translational+Raman+system+for+oral+cancer+application&aulast=Maryam&pid=<author>Maryam+S.%3BKonugolu+Venkata+Sekar+S.%3BGhauri+M.D.%3BFahy+E.%3BNogueira+M.S.%3BLu+H.%3BBeffara+F.%3BHumbert+G.%3BNi+Riordain+R.%3BSheahan+P.%3BBurke+R.%3BWei+Kho+K.%3BGautam+R.%3BAndersson-Engels+S.<%2Fauthor><AN>640543061<%2FAN><DT>Article<%2FDT>)

3.

High-Precision Detection of Cellular Drug Response Based on SERS Spectrum and Multivariate Statistical Analysis.

Wu F., Wu Z., Wang X., Liu Y., Ye Q.

Biosensors. 13(2) (no pagination), 2023. Article Number: 241. Date of Publication: February 2023.

AN: 2021795073

The rapid development of personalized medicine places high demands on the control of drug dose and cellular drug response to provide patients with better curative effects and low side effects. To solve the problem of low detection accuracies of the cell-counting kit-8 (CCK8) method, a detection method based on surface-enhanced Raman spectroscopy (SERS) of cell-secreted proteins was adopted to evaluate the concentration of the anticancer drug cisplatin and the cellular drug response of nasopharyngeal carcinoma. CNE1 and NP69 cell lines were used to evaluate cisplatin response. The results showed that the combination of the SERS spectrum with principal component analysis-linear discriminant analysis could detect the difference in the response of cisplatin with a concentration difference of 1 mug/mL, which considerably exceeded that of CCK8. In addition, the SERS spectral peak intensity of the cell-secreted proteins strongly correlated with the cisplatin concentration. Furthermore, the mass spectrum of the secreted proteins of the nasopharyngeal carcinoma cells was analyzed to verify the results obtained using the SERS spectrum. The results demonstrated that SERS of secreted proteins has great potential for high-precision detection of chemotherapeutic drug response.

Copyright © 2023 by the authors.

PMID

36832007 [<https://www.ncbi.nlm.nih.gov/pubmed/?term=36832007>]

Author NameID

Wu, Fengfang; ORCID: <https://orcid.org/0000-0002-4415-8171>

Institution

(Wu, Wang, Liu, Ye) Shengli Clinical Medical College of Fujian Medical University, Fuzhou 350001, China (Wu) Department of Otolaryngology, Head and Neck Surgery, Quanzhou First Hospital Affiliated to Fujian Medical University, Quanzhou 362000, China

(Wu, Ye) Department of Otolaryngology, Head and Neck Surgery, Fujian Provincial Hospital, Fuzhou 350001, China

Publisher

MDPI

Emtree Heading

article; cell viability assay kit; CNE-1 cell line; controlled study; discriminant analysis; *drug response; human; human cell; mass spectrometry; *nasopharynx carcinoma; NP69SV40T cell line; principal component analysis; *surface enhanced Raman spectroscopy; antiinfective agent; *cisplatin.

Drug Index Terms

antiinfective agent [m]; *cisplatin [m].

Other Index Terms

article [m]; cell viability assay kit [m]; CNE-1 cell line [m]; controlled study [m]; discriminant analysis [m]; *drug response [m]; human [m]; human cell [m]; mass spectrometry [m]; *nasopharynx carcinoma [m]; NP69SV40T cell line [m]; principal component analysis [m]; *surface enhanced Raman spectroscopy [m].

Link to the Ovid Full Text or citation:

[Click here for full text options](https://ovidsp.ovid.com/ovidweb.cgi?T=JS&CSC=Y&NEWS=N&PAGE=fulltext&D=emexb&AN=2021795073)

Link to the External Link Resolver:

[SFX](https://sfx-86scu.hosted.exlibrisgroup.com.cn/86scu?sid=OVID:embase&id=pmid:36832007&id=doi:10.3390%2Fbios13020241&issn=20796374&isbn=&volume=13&issue=2&spage=241&pages=&date=2023&title=Biosensors&atitle=High-Precision+Detection+of+Cellular+Drug+Response+Based+on+SERS+Spectrum+and+Multivariate+Statistical+Analysis&aulast=Wu&pid=<author>Wu+F.%3BWu+Z.%3BWang+X.%3BLiu+Y.%3BYe+Q.<%2Fauthor><AN>2021795073<%2FAN><DT>Article<%2FDT>)

4.

Mannose-modified erythrocyte membrane-encapsulated chitovanic nanoparticles as a DNA vaccine carrier against reticuloendothelial tissue hyperplasia virus.

Feng Y., Tang F., Li S., Wu D., Liu Q., Li H., Zhang X., Liu Z., Zhang L., Feng H.

Frontiers in Immunology. 13 (no pagination), 2023. Article Number: 1066268. Date of Publication: 04 Jan 2023.

AN: 2021093526

Introduction: The erythrocyte membranes used in nanovaccines include high membrane stability, long circulation life, adaptability and extremely good bio compatibility. Nanoparticles encapsulated by erythrocyte membranes are widely used as ideal drug delivery vehicles because of their high drug loading, long circulation time, and excellent biocompatibility. The mannose modification of delivery materials can help target mannose receptors (MRs) to deliver antigens to antigen-presenting cells (APCs).

Method(s): In this study, the antigen gene gp90 of avian reticuloendotheliosis virus (REV) was encapsulated with carboxymethyl chitosan (CS) to obtain CSgp90 nanoparticles, which were coated with mannose-modied fowl erythrocyte membranes to yield CS-gp90@M-M nanoparticles. The physicochemical characterization and immune response of the CS-gp90@M-M nanoparticles were investigated in vitro and in vivo.

Result(s): CS-gp90@M-M nanoparticles were rapidly phagocytized in vitro by macrophages to induce the production of cytokines and nitric oxide. In vivo, CS-gp90@M-M nanoparticles increased cytokine levels, the CD4+/8+ ratio, REV-specific antibodies in the peripheral blood of chicks, and the mRNA levels of immune-related genes in the spleen and bursa of immunized chicks. CS-gp90@M-M nanoparticles could be targeted to lymphoid organs to prolong the retention time of the nanoparticles at the injection site and lymphatic organs, leading to a strong, sustained immune response. Moreover, the CS-gp90@M-M nano-vaccine showed a lasting immunoprotective effect and improved the body weight of chicks after the challenge.

Conclusion(s): Overall, CS-gp90@M-M nanoparticles can be used in vaccine designs as an effective delivery carrier with immune response-enhancing effects.

Copyright © 2023 Feng, Tang, Li, Wu, Liu, Li, Zhang, Liu, Zhang and Feng.

PMID

36776397 [<https://www.ncbi.nlm.nih.gov/pubmed/?term=36776397>]

Institution

(Feng, Tang, Li, Wu, Liu, Li, Zhang, Liu, Zhang, Feng) College of Animal Husbandry and Veterinary Medicine, Southwest Minzu University, Chengdu, China (Feng, Tang, Li, Wu, Liu, Li, Zhang, Liu, Zhang, Feng) Key Laboratory of Ministry of Education and Sichuan Province for Qinghai-Tibetan Plateau Animal Genetic Resource Reservation and Utilization, Southwest-Minzu University, Chengdu, China

Publisher

Frontiers Media S.A.

Emtree Heading

animal experiment; animal model; animal tissue; antigen presenting cell; article; biocompatibility; CD4+ T lymphocyte; CD8+ T lymphocyte; confocal laser scanning microscopy; controlled study; cytotoxicity; dispersity; *drug delivery system; enzyme linked immunosorbent assay; *erythrocyte membrane; flow cytometer; Fourier transform infrared spectroscopy; immune response; immunization; LSCC-HD11 cell line; MTT assay; nonhuman; particle size; Raman spectrometry; real time polymerase chain reaction; *reticuloendotheliosis/dt [Drug Therapy]; *Reticuloendotheliosis virus; RNA extraction; T lymphocyte; transmission electron microscopy; zeta potential; *chitosan/an [Drug Analysis]; *chitosan/dv [Drug Development]; *chitosan/dt [Drug Therapy]; *DNA vaccine; *drug carrier; inducible nitric oxide synthase; interferon induced helicase C domain containing protein 1; interferon regulatory factor 7; interleukin 4; liposome; *mannose; *nanoparticle/an [Drug Analysis]; *nanoparticle/dv [Drug Development]; nitric oxide; STAT1 protein; toll like receptor 7; confocal laser scanning microscope; ELISA kit; microplate reader; polymerase chain reaction system; spectrophotometer; transmission electron microscope; 8400S; iMark; LabRAM; Tecnai G2 F20.

Candidate Terms

8400S [device term] iMark [device term]

LabRAM [device term]

Tecnai G2 F20 [device term]

Device Index Terms

confocal laser scanning microscope; ELISA kit; flow cytometer; microplate reader; polymerase chain reaction system; spectrophotometer; transmission electron microscope.

Drug Index Terms

*chitosan / *drug analysis / *drug development / *drug therapy; *DNA vaccine; *drug carrier; inducible nitric oxide synthase; interferon induced helicase C domain containing protein 1; interferon regulatory factor 7; interleukin 4; liposome; *mannose; *nanoparticle / *drug analysis / *drug development; nitric oxide; STAT1 protein; toll like receptor 7.

Other Index Terms

animal experiment; animal model; animal tissue; antigen presenting cell; Article; biocompatibility; CD4+ T lymphocyte; CD8+ T lymphocyte; confocal laser scanning microscopy; controlled study; cytotoxicity; dispersity; *drug delivery system; enzyme linked immunosorbent assay; *erythrocyte membrane; flow cytometer; Fourier transform infrared spectroscopy; immune response; immunization; LSCC-HD11 cell line; MTT assay; nonhuman; particle size; Raman spectrometry; real time polymerase chain reaction; *reticuloendotheliosis / *drug therapy; *Reticuloendotheliosis virus; RNA extraction; T lymphocyte; transmission electron microscopy; zeta potential.

Link to the Ovid Full Text or citation:

[Click here for full text options](https://ovidsp.ovid.com/ovidweb.cgi?T=JS&CSC=Y&NEWS=N&PAGE=fulltext&D=emexb&AN=2021093526)

Link to the External Link Resolver:

[SFX](https://sfx-86scu.hosted.exlibrisgroup.com.cn/86scu?sid=OVID:embase&id=pmid:36776397&id=doi:10.3389%2Ffimmu.2022.1066268&issn=16643224&isbn=&volume=13&issue=&spage=1066268&pages=&date=2023&title=Frontiers+in+Immunology&atitle=Mannose-modified+erythrocyte+membrane-encapsulated+chitovanic+nanoparticles+as+a+DNA+vaccine+carrier+against+reticuloendothelial+tissue+hyperplasia+virus&aulast=Feng&pid=<author>Feng+Y.%3BTang+F.%3BLi+S.%3BWu+D.%3BLiu+Q.%3BLi+H.%3BZhang+X.%3BLiu+Z.%3BZhang+L.%3BFeng+H.<%2Fauthor><AN>2021093526<%2FAN><DT>Article<%2FDT>)

5.

Shifted-excitation Raman difference spectroscopy for improving in vivo detection of nasopharyngeal carcinoma.

Lin J., Lin D., Qiu S., Huang Z., Liu F., Huang W., Xu Y., Zhang X., Feng S.

Talanta. 257 (pp 124330), 2023. Date of Publication: 08 Feb 2023.

AN: 640304244

A strong fluorescence background is one of the common interference factors of Raman spectroscopic analysis in biological tissue. This study developed an endoscopic shifted-excitation Raman difference spectroscopy (SERDS) system for real-time in vivo detection of nasopharyngeal carcinoma (NPC) for the first time. Owing to the use of the SERDS method, the high-quality Raman signals of nasopharyngeal tissue could be well extracted and characterized from the complex raw spectra by removing the fluorescence interference signals. Significant spectral differences relating to proteins, phospholipids, glucose, and DNA were found between 42 NPC and 42 normal tissue sites. Using linear discriminant analysis, the diagnostic accuracy of SERDS for NPC detection was 100%, which was much higher than that of raw Raman spectroscopy (75.0%), showing the great potential of SERDS for improving the accurate in vivo detection of NPC.

Copyright © 2023. Published by Elsevier B.V.

PMID

36773510 [<https://www.ncbi.nlm.nih.gov/pubmed/?term=36773510>]

Institution

(Lin) Clinical Oncology School of Fujian Medical University, Fujian Cancer Hospital, Fuzhou, 350014, China; Key Laboratory of OptoElectronic Science and Technology for Medicine, Ministry of Education, Fujian Provincial Key Laboratory for Photonics Technology, Fujian Normal University, Fuzhou, 350007, China (Lin, Huang, Zhang, Feng) Key Laboratory of OptoElectronic Science and Technology for Medicine, Ministry of Education, Fujian Provincial Key Laboratory for Photonics Technology, Fujian Normal University, Fuzhou 350007, China

(Qiu, Xu) Clinical Oncology School of Fujian Medical University, Fujian Cancer Hospital, Fuzhou 350014, China

(Liu) Simple & Smart Instrument (Beijing) Co., Ltd, China

(Huang) Department of Forensic Science, Fujian Police College, Fuzhou 350007, China

Publisher

NLM (Medline)

Emtree Heading

animal experiment; animal model; animal tissue; article; controlled study; diagnostic accuracy; diagnostic test accuracy study; discriminant analysis; *endoscopy; *excitation; fluorescence; human; *in vivo study; *nasopharynx carcinoma; nonhuman; *Raman spectrometry; glucose; phospholipid.

Drug Index Terms

glucose [m]; phospholipid [m].

Other Index Terms

animal experiment [m]; animal model [m]; animal tissue [m]; article [m]; controlled study [m]; diagnostic accuracy [m]; diagnostic test accuracy study [m]; discriminant analysis [m]; *endoscopy [m]; *excitation [m]; fluorescence [m]; human [m]; *in vivo study [m]; *nasopharynx carcinoma [m]; nonhuman [m]; *Raman spectrometry [m].

Link to the Ovid Full Text or citation:

[Click here for full text options](https://ovidsp.ovid.com/ovidweb.cgi?T=JS&CSC=Y&NEWS=N&PAGE=fulltext&D=emexb&AN=640304244)

Link to the External Link Resolver:

[SFX](https://sfx-86scu.hosted.exlibrisgroup.com.cn/86scu?sid=OVID:embase&id=pmid:36773510&id=doi:10.1016%2Fj.talanta.2023.124330&issn=18733573&isbn=&volume=257&issue=&spage=124330&pages=124330&date=2023&title=Talanta&atitle=Shifted-excitation+Raman+difference+spectroscopy+for+improving+in+vivo+detection+of+nasopharyngeal+carcinoma&aulast=Lin&pid=<author>Lin+J.%3BLin+D.%3BQiu+S.%3BHuang+Z.%3BLiu+F.%3BHuang+W.%3BXu+Y.%3BZhang+X.%3BFeng+S.<%2Fauthor><AN>640304244<%2FAN><DT>Article<%2FDT>)

6.

Diagnostic Aids and Techniques of Oral Cancer-An Updated Review.

Deivanayagi M., Afreen Fathima I.

International Journal of Research in Pharmaceutical Sciences. 14(1) (pp 15-20), 2023. Date of Publication: 05 Jan 2023.

AN: 2018967535

Oral cancer is the most prevalent and lethal type with a four in every 3000 incidence rate worldwide and a 3% survival rate. Oral squamous cell car-cinoma (OSCC), which is multifactorial, is brought on by genetic and epigenetic instability. Oral potentially malignant disorders (OPMDs) are precursor lesions that often precede oral cancer, and their early diagnosis is advanta-geous for patients since it may lengthen their productive longevity. Currently, oral cancer screening, early identification, and its pre-invasive intraepithelial phases are still largely focused on visual inspection of the mouth. These methods are subjective and early lesions can be easily missed. Due to a lack of early identification, oral cancer's five-year survival rate is still low. Recently, the World Health Organization (WHO) and the International Agency for Research on Cancer (IARC) emphasised that by developing efficient cancer control and screening strategies, we can prevent a third of the 15 million cancer cases that are expected to occur in the future and better manage a second third. Oral cancer screening aids and techniques have witnessed a lot of advancements recently. This article reviews the current diagnostic methods and instruments for detecting oral cancer, which include the oral CDx brush, Velscope, Chemi-luminescence, DNA ploidy, microarray technology, colposcopy, and oral scan. It also adds on the molecular (genetic and epigenetic alterations) & decoding of the oral carcinogenesis genomics data.

Copyright © International Journal of Research in Pharmaceutical Sciences.

Institution

(Deivanayagi) Department of Oral Medicine and Radiology, Adhiparasakthi Dental College and Hospital, Melmaruvathur, Tamil Nadu, Chengalpattu 603319, India (Afreen Fathima) Ragas Dental College and Hospital, Uthandi, Tamil Nadu, Chennai 600119, India

Publisher

J. K. Welfare and Pharmascope Foundation

Emtree Heading

brush biopsy; cancer screening; carcinogenesis; chemoluminescence; colposcopy; cytology; diagnostic procedure; DNA microarray; early diagnosis; elastography; epigenetics; epithelial mesenchymal transition; fluorescence imaging; gene rearrangement; genomics; high throughput sequencing; human; microarray analysis; *mouth cancer/di [Diagnosis]; optical coherence tomography; oral potentially malignant disorder; ploidy; positron emission tomography; proteomics; reverse transcription polymerase chain reaction; review; sensitivity analysis; squamous cell carcinoma; surface enhanced Raman spectroscopy; survival rate; transcriptomics; tumor invasion; World Health Organization; amylase/ec [Endogenous Compound]; epidermal growth factor receptor/ec [Endogenous Compound]; interleukin 8/ec [Endogenous Compound]; biopsy brush; cancer prognostic test kit; nanochip; ultraviolet detector; reflective tissue fluorescence; tissue fluorescence imaging; Oral CDx brush.

Candidate Terms

reflective tissue fluorescence [other term] tissue fluorescence imaging [other term]

Oral CDx brush [device term]

Device Index Terms

biopsy brush; cancer prognostic test kit; nanochip; ultraviolet detector.

Drug Index Terms

amylase / endogenous compound; epidermal growth factor receptor / endogenous compound; interleukin 8 / endogenous compound.

Other Index Terms

brush biopsy; cancer screening; carcinogenesis; chemoluminescence; colposcopy; cytology; diagnostic procedure; DNA microarray; early diagnosis; elastography; epigenetics; epithelial mesenchymal transition; fluorescence imaging; gene rearrangement; genomics; high throughput sequencing; human; microarray analysis; *mouth cancer / *diagnosis; optical coherence tomography; oral potentially malignant disorder; ploidy; positron emission tomography; proteomics; reverse transcription polymerase chain reaction; Review; sensitivity analysis; squamous cell carcinoma; surface enhanced Raman spectroscopy; survival rate; transcriptomics; tumor invasion; World Health Organization.

Link to the Ovid Full Text or citation:

[Click here for full text options](https://ovidsp.ovid.com/ovidweb.cgi?T=JS&CSC=Y&NEWS=N&PAGE=fulltext&D=emexb&AN=2018967535)

Link to the External Link Resolver:

[SFX](https://sfx-86scu.hosted.exlibrisgroup.com.cn/86scu?sid=OVID:embase&id=pmid:&id=doi:10.26452%2Fijrps.v14i1.4177&issn=09757538&isbn=&volume=14&issue=1&spage=15&pages=15-20&date=2023&title=International+Journal+of+Research+in+Pharmaceutical+Sciences&atitle=Diagnostic+Aids+and+Techniques+of+Oral+Cancer-An+Updated+Review&aulast=Deivanayagi&pid=<author>Deivanayagi+M.%3BAfreen+Fathima+I.<%2Fauthor><AN>2018967535<%2FAN><DT>Review<%2FDT>)

7.

Rapid adsorption of triclosan and p-chloro-m-xylenol by nitrogen-doped magnetic porous carbon.

Li Q., Huang L., Zhu P., Zhong M., Xu S.

Environmental science and pollution research international. 30(1) (pp 1640-1655), 2023. Date of Publication: 01 Jan 2023.

AN: 638660255

Contamination of water resources with organic substances like phenolic fungicides is undesirable due to the improvement of living standards, the huge production of chemicals, the heavy consumption of daily chemical products, and the growth of the population. In this study, Co-based zeolitic imidazole framework-67 (ZIF-67(Co)) was synthesized using the "one-pot method," and the best Co-based N-doped magnetic porous carbon (Co-NPC) was prepared by ZIF-67(Co) carbonization in an atmosphere of N2. The materials were tested using an X-ray diffractometer (XRD), scanning electron microscope (SEM), infrared spectroscopy (IR), Raman spectroscopy, X-ray photoelectron spectroscopy (XPS), N2 adsorption-desorption, and magnetization analysis. These characterizations indicated that the Co-NPC was successfully prepared. With the original morphology of ZIF-67(Co) crystals, the Co-NPC also has good porosity, magnetic properties, and a large specific surface area. In water, Co-NPC-800 has a good adsorption capacity for triclosan (TCS) and p-chloro-m-xylenol (PCMX), which are kinds of aromatic fungicides. The adsorption of Co-NPC-800 on both reached equilibrium within 3 min, which is in accordance with the quasi-second-order kinetic model. At 298 K, the maximum adsorption capacity of Co-NPC-800 for TCS and PCMX was 163 and 39 mg.g-1, respectively. The adsorption of TCS and PCMX by Co-NPC-800 is a spontaneous endothermic process with reduced entropy. The combination of Co-NPC-800 and phenols come from multiple actions of electrostatic, pi-pi, and hydrogen bond effects. Moreover, Co-NPC-800 can be regenerated through simple washing and can be reused at least three times by a magnet. The Co-NPC-800 has good porosity, large specific surface area, comparable adsorption capacity, rapid adsorption time, so it could be broadly used in sewage treatments and other environmental fields.

Copyright © 2022. The Author(s), under exclusive licence to Springer-Verlag GmbH Germany, part of Springer Nature.

PMID

35921007 [<https://www.ncbi.nlm.nih.gov/pubmed/?term=35921007>]

Author NameID

Xu, Shuxia; ORCID: <https://orcid.org/0000-0002-4235-7847>

Institution

(Li) College of Earth Science, Chengdu University of Technology, Chengdu, Sichuan 610059, China (Huang, Zhu, Zhong, Xu) College of Ecology and Environment, Chengdu University of Technology, Chengdu, Sichuan 610059, China

(Zhong, Xu) State Environmental Protection Key Laboratory of Synergetic Control and Joint Remediation for Soil & Water Pollution, Chengdu University of Technology, Chengdu 610059, China

Publisher

NLM (Medline)

Emtree Heading

adsorption; chemistry; kinetics; magnetism; porosity; *water pollutant; carbon; chloroxylenol; *fungicide; nitrogen; *triclosan.

Drug Index Terms

carbon; chloroxylenol; *fungicide; nitrogen; *triclosan.

Other Index Terms

adsorption; chemistry; kinetics; magnetism; porosity; *water pollutant.

Link to the Ovid Full Text or citation:

[Click here for full text options](https://ovidsp.ovid.com/ovidweb.cgi?T=JS&CSC=Y&NEWS=N&PAGE=fulltext&D=emexb&AN=638660255)

Link to the External Link Resolver:

[SFX](https://sfx-86scu.hosted.exlibrisgroup.com.cn/86scu?sid=OVID:embase&id=pmid:35921007&id=doi:10.1007%2Fs11356-022-22084-y&issn=16147499&isbn=&volume=30&issue=1&spage=1640&pages=1640-1655&date=2023&title=Environmental+science+and+pollution+research+international&atitle=Rapid+adsorption+of+triclosan+and+p-chloro-m-xylenol+by+nitrogen-doped+magnetic+porous+carbon&aulast=Li&pid=<author>Li+Q.%3BHuang+L.%3BZhu+P.%3BZhong+M.%3BXu+S.<%2Fauthor><AN>638660255<%2FAN><DT>Article<%2FDT>)

8.

Analysis of urine using electronic tongue towards non-invasive cancer diagnosis.

Zniber M., Vahdatiyekta P., Huynh T.-P.

Biosensors and Bioelectronics. 219 (no pagination), 2023. Article Number: 114810. Date of Publication: 01 Jan 2023.

AN: 2020777988

Electronic tongues (e-tongues) have been broadly employed in monitoring the quality of food, beverage, cosmetics, and pharmaceutical products, and in diagnosis of diseases, as the e-tongues can discriminate samples of high complexity, reduce interference of the matrix, offer rapid response. Compared to other analytical approaches using expensive and complex instrumentation as well as required sample preparation, the e-tongue is non-destructive, miniaturizable and on-site method with little or no preparation of samples. Even though e-tongues are successfully commercialized, their application in cancer diagnosis from urine samples is underestimated. In this review, we would like to highlight the various analytical techniques such as Raman spectroscopy, infrared spectroscopy, fluorescence spectroscopy, and electrochemical methods (potentiometry and voltammetry) used as e-tongues for urine analysis towards non-invasive cancer diagnosis. Besides, different machine learning approaches, for instance, supervised and unsupervised learning algorithms are introduced to analyze extracted chemical data. Finally, capabilities of e-tongues in distinguishing between patients diagnosed with cancer and healthy controls are highlighted.

Copyright © 2022 The Authors

PMID

36272349 [<https://www.ncbi.nlm.nih.gov/pubmed/?term=36272349>]

Author NameID

Zniber, Mohammed; ORCID: <https://orcid.org/0000-0001-9617-5099> Huynh, Tan-Phat; ORCID: <https://orcid.org/0000-0002-7408-7669>

Institution

(Zniber, Vahdatiyekta, Huynh) Laboratory of Molecular Science and Engineering, Abo Akademi University, 20500, Turku, Finland

Publisher

Elsevier Ltd

Emtree Heading

back propagation neural network; breast cancer/di [Diagnosis]; cancer diagnosis; cyclic voltammetry; discriminant analysis; electrochemistry; human; infrared spectroscopy; machine learning; *malignant neoplasm/di [Diagnosis]; *non invasive procedure; principal component analysis; prostate cancer/di [Diagnosis]; Raman spectrometry; review; spectrofluorometry; *urinalysis; voltammetry; biosensor; *medical device; *electronic tongue.

Candidate Terms

*electronic tongue [device term]

Device Index Terms

biosensor; *medical device.

Other Index Terms

back propagation neural network; breast cancer / diagnosis; cancer diagnosis; cyclic voltammetry; discriminant analysis; electrochemistry; human; infrared spectroscopy; machine learning; *malignant neoplasm / *diagnosis; *non invasive procedure; principal component analysis; prostate cancer / diagnosis; Raman spectrometry; Review; spectrofluorometry; *urinalysis; voltammetry.

Link to the Ovid Full Text or citation:

[Click here for full text options](https://ovidsp.ovid.com/ovidweb.cgi?T=JS&CSC=Y&NEWS=N&PAGE=fulltext&D=emexa&AN=2020777988)

Link to the External Link Resolver:

[SFX](https://sfx-86scu.hosted.exlibrisgroup.com.cn/86scu?sid=OVID:embase&id=pmid:36272349&id=doi:10.1016%2Fj.bios.2022.114810&issn=09565663&isbn=&volume=219&issue=&spage=114810&pages=&date=2023&title=Biosensors+and+Bioelectronics&atitle=Analysis+of+urine+using+electronic+tongue+towards+non-invasive+cancer+diagnosis&aulast=Zniber&pid=<author>Zniber+M.%3BVahdatiyekta+P.%3BHuynh+T.-P.<%2Fauthor><AN>2020777988<%2FAN><DT>Review<%2FDT>)

9.

Gefitinib-resveratrol Cocrystal with Optimized Performance in Dissolution and Stability.

Zhai L., Zhang Z., Guo L., Dong H., Yu J., Zhang G.

Journal of Pharmaceutical Sciences. 111(12) (pp 3224-3231), 2022. Date of Publication: December 2022.

AN: 2020773144

Gefitinib (GEF) is an anti-tumor oral solid formulation with a superior advantage for lung tumors. However, it has poor aqueous solubility which limits its utility in vivo. Herein, a novel cocrystal (GEF-RES) assembled by GEF and RES (Resveratrol) has been successfully prepared and comprehensively characterized by differential scanning calorimetry, thermogravimetric analysis, Raman spectroscopy and powder X-ray diffraction. A single-crystal structure of the GEF-RES cocrystal was solved and illustrated in detail. In aqueous hydrochloric acid, the GEF-RES cocrystal showed that the maximum concentration of GEF was slightly higher than that of raw GEF. Furthermore, the thermal and physical stability of the GEF-RES cocrystal were also evaluated in this paper. The enhanced solubility and excellent solid-state stability results may provide new potential to the application of key GEF in clinical.

Copyright © 2022

PMID

36202251 [<https://www.ncbi.nlm.nih.gov/pubmed/?term=36202251>]

Author NameID

Zhang, Guimin; ORCID: <https://orcid.org/0000-0002-3431-8442>

Institution

(Zhai, Zhang, Guo, Dong, Yu, Zhang) Lunan Pharmaceutical Group Co., Ltd, Linyi 273400, China (Zhai, Zhang, Guo, Dong, Zhang) National Engineering and Technology Research Centre of Chiral Pharmaceutical, Linyi 273400, China

Publisher

Elsevier B.V.

Emtree Heading

article; biocompatibility; chemical structure; crystal structure; crystallization; differential scanning calorimetry; *dissolution; drug coating; drug delivery system; drug mixture; drug penetration; drug release; *drug solubility; *drug stability; flow rate; high performance liquid chromatography; hydrogen bond; in vitro study; infrared spectroscopy; maximum concentration; melting point; molecular dynamics; molecular weight; particle size; Raman spectrometry; scanning electron microscopy; size exclusion chromatography; *solid state; surface property; terahertz spectroscopy; thermal analysis; thermogravimetry; thermostability; transmission electron microscopy; X ray diffraction; flavonoid; *gefitinib/an [Drug Analysis]; *gefitinib/pr [Pharmaceutics]; *gefitinib/pk [Pharmacokinetics]; *gefitinib/pd [Pharmacology]; indium; polyphenol; *resveratrol/an [Drug Analysis]; *resveratrol/pr [Pharmaceutics]; *resveratrol/pk [Pharmacokinetics]; *resveratrol/pd [Pharmacology]; high performance liquid chromatograph; scanning electron microscope; thermometer; X ray detector; Sigma 500; THMS 600.

Candidate Terms

Sigma 500 [device term] THMS 600 [device term]

Device Index Terms

high performance liquid chromatograph; scanning electron microscope; thermometer; X ray detector.

Drug Index Terms

flavonoid; *gefitinib / *drug analysis / *pharmaceutics / *pharmacokinetics / *pharmacology; indium; polyphenol; *resveratrol / *drug analysis / *pharmaceutics / *pharmacokinetics / *pharmacology.

Other Index Terms

Article; biocompatibility; chemical structure; crystal structure; crystallization; differential scanning calorimetry; *dissolution; drug coating; drug delivery system; drug mixture; drug penetration; drug release; *drug solubility; *drug stability; flow rate; high performance liquid chromatography; hydrogen bond; in vitro study; infrared spectroscopy; maximum concentration; melting point; molecular dynamics; molecular weight; particle size; Raman spectrometry; scanning electron microscopy; size exclusion chromatography; *solid state; surface property; terahertz spectroscopy; thermal analysis; thermogravimetry; thermostability; transmission electron microscopy; X ray diffraction.

Link to the Ovid Full Text or citation:

[Click here for full text options](https://ovidsp.ovid.com/ovidweb.cgi?T=JS&CSC=Y&NEWS=N&PAGE=fulltext&D=emexb&AN=2020773144)

Link to the External Link Resolver:

[SFX](https://sfx-86scu.hosted.exlibrisgroup.com.cn/86scu?sid=OVID:embase&id=pmid:36202251&id=doi:10.1016%2Fj.xphs.2022.09.031&issn=00223549&isbn=&volume=111&issue=12&spage=3224&pages=3224-3231&date=2022&title=Journal+of+Pharmaceutical+Sciences&atitle=Gefitinib-resveratrol+Cocrystal+with+Optimized+Performance+in+Dissolution+and+Stability&aulast=Zhai&pid=<author>Zhai+L.%3BZhang+Z.%3BGuo+L.%3BDong+H.%3BYu+J.%3BZhang+G.<%2Fauthor><AN>2020773144<%2FAN><DT>Article<%2FDT>)

10.

A narrative review on machine learning in diagnosis and prognosis prediction for tongue squamous cell carcinoma.

Lin Y., Tang M., Liu Y., Jiang M., He S., Zeng D., Cui M.-Y.

Translational Cancer Research. 11(12) (pp 4409-4415), 2022. Date of Publication: December 2022.

AN: 2022596776

Background: Tongue squamous cell carcinoma (TSCC) is the most common subtype of oral cavity squamous cell carcinoma (OCSCC), and it also has the worst prognosis. It is crucial to find an effective way to solve the challenges in diagnosis and prognosis prediction for TSCC. Machine learning (ML) has been widely used in medical research and has shown good performance. It can be used for feature extraction, feature selection, model construction, etc. Radiomics and deep learning (DL), the new components of ML, have also been utilized to explore the relationship between image features and diseases. The current study aimed to highlight the importance of ML as a potential method for addressing the challenges in diagnosis and prognosis prediction of TSCC by reviewing studies on ML in TSCC.

Method(s): The studies on ML in TSCC in PubMed, Scopus, Web of Science, and China National Knowledge Infrastructure published between the dates of inception of these databases and April 30, 2022, were reviewed. Key Content and Findings: ML (including radiomics and DL) which was used in diagnosis and prognosis prediction for TSCC, has shown promising performance.

Conclusion(s): Despite its limitations, ML is still a potential approach that can help to deal with the challenges in diagnosis and prognosis prediction for TSCC. Nevertheless, more efforts are needed to enhance the usefulness of ML in this field.

Copyright © 2022 AME Publishing Company. All rights reserved.

Author NameID

Lin, Yingyu; ORCID: <https://orcid.org/0000-0003-4043-5968> Cui, Min-Yi; ORCID: <https://orcid.org/0000-0002-8900-2461>

Institution

(Lin, Tang) Department of Radiology, The First Affiliated Hospital, Sun Yat-sen University, Guangzhou, China (Liu, Jiang, He, Zeng, Cui) Department of Radiology, Hospital of Stomatology, Sun Yat-sen University, Guangdong Provincial Key Laboratory of Stomatology, Guangzhou, China

Publisher

AME Publishing Company

Emtree Heading

artificial neural network; autofluorescence imaging; *cancer prognosis; computer assisted tomography; deep learning; depth of invasion; diagnostic procedure; Doppler flowmetry; early intervention; feature extraction; feature selection; hyperspectral imaging; *machine learning; mouth cavity; neutrophil lymphocyte ratio; nuclear magnetic resonance; overall survival; Raman spectrometry; reoperation; review; sensitivity and specificity; support vector machine; surgical margin; T2 weighted imaging; *tongue carcinoma/di [Diagnosis].

Other Index Terms

artificial neural network; autofluorescence imaging; *cancer prognosis; computer assisted tomography; deep learning; depth of invasion; diagnostic procedure; Doppler flowmetry; early intervention; feature extraction; feature selection; hyperspectral imaging; *machine learning; mouth cavity; neutrophil lymphocyte ratio; nuclear magnetic resonance; overall survival; Raman spectrometry; reoperation; Review; sensitivity and specificity; support vector machine; surgical margin; T2 weighted imaging; *tongue carcinoma / *diagnosis.

Link to the Ovid Full Text or citation:

[Click here for full text options](https://ovidsp.ovid.com/ovidweb.cgi?T=JS&CSC=Y&NEWS=N&PAGE=fulltext&D=emexb&AN=2022596776)

Link to the External Link Resolver:

[SFX](https://sfx-86scu.hosted.exlibrisgroup.com.cn/86scu?sid=OVID:embase&id=pmid:&id=doi:10.21037%2Ftcr-22-1669&issn=2218676X&isbn=&volume=11&issue=12&spage=4409&pages=4409-4415&date=2022&title=Translational+Cancer+Research&atitle=A+narrative+review+on+machine+learning+in+diagnosis+and+prognosis+prediction+for+tongue+squamous+cell+carcinoma&aulast=Lin&pid=<author>Lin+Y.%3BTang+M.%3BLiu+Y.%3BJiang+M.%3BHe+S.%3BZeng+D.%3BCui+M.-Y.<%2Fauthor><AN>2022596776<%2FAN><DT>Review<%2FDT>)

11.

Gold Nanoparticles in Diagnosis & Management of Oral Cancer & Pre-Cancerous Lesions.

Balmuchu I., Bhagawati B.T., Kumar N., Sharanamma B., Jyotsana

European Journal of Molecular and Clinical Medicine. 9(7) (pp 9263-9267), 2022. Date of Publication: June 2022.

AN: 2022161473

Gold is one of the first metals to have been discovered; the history of its study and application spans at least several thousand years. In particular, the optical properties of GNP are determined by their plasmon resonance, which is associated with the collective excitation of conduction electrons and localized in the broad region. The application of nanotechnology for the treatment of cancer is mostly based on early tumor detection and diagnosis by nanodevices capable of selective targeting and delivery of chemotherapeutic drugs to the specific tumor site. The nanotechnology-based detection and diagnostic methods used are Magnetic resonance imaging (MRI), Optical coherence tomography (OCT), Photoacoustic imaging, Surface plasmon resonance scattering, Surface-enhanced Raman spectroscopy, Diffusion reflection imaging, Quantum dots imaging, and Nano-based ultrasensitive biomarker detection. Due to the remarkable properties of gold nanoparticles, they have long been considered a potential tool for the diagnosis of various cancers and for drug delivery applications. Recent advances in nanomedicine make it auspicious for cancer diagnosis and treatment. The attractive properties of gold nanomaterials, particularly, antiangiogenic properties, are highly useful in a variety of cancer studies. In addition, they can bind many proteins and drugs and can be actively targeted to cancer cells by over-expressing cell surface receptors and they are biocompatible in nature with a high atomic number, which directs to greater absorption of kilovoltage X-rays and provides greater contrast than standard agents. Nano-based contrast agents for MRI, OCT, and photoacoustic imaging have lower toxicity, prolonged blood circulation half-life, and the ability to target unique cell surface molecules. The nano agents exhibit better image contrast properties and improved penetration depth than routine contrast agents. They can provide molecular-targeted imaging, analyze biomarkers at the nano-scale, enable intraoperative identification of surgical resection margins, and monitor oral cancer prognosis after treatment. Using nano-based techniques can help clinicians to detect and better monitor diseases during different phases of oral malignancy. This review will focus on such current modalities in the diagnosis & management of oral cancer and pre-cancerous lesions using gold nanoparticles.

Copyright © 2022 Authors. All rights reserved.

Institution

(Balmuchu, Kumar) Department of Oral Medicine and Radiology, Surendera Dental College & Research Institute, Rajasthan, Sriganganagar, India (Bhagawati) Department of Oral Medicine and Radiology, Dashmesh Institute of Research and Dental Sciences, Punjab, Faridkot, India

(Sharanamma) Department of Periodontology and Implantology, Hazaribagh Dental College, Jharkhand, Hazaribagh, India

(Jyotsana) Department of Pedodontics and Preventive Dentistry, Surendera Dental College & Research Institute, Rajasthan, India

Publisher

EJMCM, International House

Emtree Heading

article; *cancer cell; cancer diagnosis; cancer prognosis; cancer surgery; cell surface; circulation; diagnosis; diagnostic procedure; diffusion; drug delivery system; electron; excision; excitation; gene overexpression; half life time; human; *mouth cancer; nanodevice; nanomedicine; nanotechnology; nuclear magnetic resonance imaging; optical coherence tomography; photoacoustics; *precancer; surface enhanced Raman spectroscopy; surface plasmon resonance; surgery; X ray; antiinfective agent; biological marker; cell surface receptor; contrast medium; *gold nanoparticle; nanochain; quantum dot.

Drug Index Terms

antiinfective agent [m]; biological marker [m]; cell surface receptor [m]; contrast medium [m]; *gold nanoparticle [m]; nanochain [m]; quantum dot [m].

Other Index Terms

article [m]; *cancer cell [m]; cancer diagnosis [m]; cancer prognosis [m]; cancer surgery [m]; cell surface [m]; circulation [m]; diagnosis [m]; diagnostic procedure [m]; diffusion [m]; drug delivery system [m]; electron [m]; excision [m]; excitation [m]; gene overexpression [m]; half life time [m]; human [m]; *mouth cancer [m]; nanodevice [m]; nanomedicine [m]; nanotechnology [m]; nuclear magnetic resonance imaging [m]; optical coherence tomography [m]; photoacoustics [m]; *precancer [m]; surface enhanced Raman spectroscopy [m]; surface plasmon resonance [m]; surgery [m]; X ray [m].

Link to the Ovid Full Text or citation:

[Click here for full text options](https://ovidsp.ovid.com/ovidweb.cgi?T=JS&CSC=Y&NEWS=N&PAGE=fulltext&D=emexb&AN=2022161473)

Link to the External Link Resolver:

[SFX](https://sfx-86scu.hosted.exlibrisgroup.com.cn/86scu?sid=OVID:embase&id=pmid:&id=doi:&issn=25158260&isbn=&volume=9&issue=7&spage=9263&pages=9263-9267&date=2022&title=European+Journal+of+Molecular+and+Clinical+Medicine&atitle=Gold+Nanoparticles+in+Diagnosis+%26+Management+of+Oral+Cancer+%26+Pre-Cancerous+Lesions&aulast=Balmuchu&pid=<author>Balmuchu+I.%3BBhagawati+B.T.%3BKumar+N.%3BSharanamma+B.%3BJyotsana<%2Fauthor><AN>2022161473<%2FAN><DT>Article<%2FDT>)

12.

Profiling of Tumor Cell-Delivered Exosome by Surface Enhanced Raman Spectroscopy-Based Biosensor for Evaluation of Nasopharyngeal Cancer Radioresistance.

Wu Q., Ding Q., Lin W., Weng Y., Feng S., Chen R., Chen C., Qiu S., Lin D.

Advanced Healthcare Materials. (no pagination), 2022. Date of Publication: 2022.

AN: 2020843469

Although the advancement of radiotherapy significantly improves the survival of nasopharyngeal cancer (NPC), radioresistance associated with recurrence and poor outcomes still remains a daunting challenge in the clinical scenario. Currently, effective biomarkers and convenient detection methods for predicting radioresistance have not been well established. Here, the surface-enhanced Raman spectroscopy combined with proteomics is used to firstly profile the characteristic spectral patterns of exosomes secreted from self-established NPC radioresistance cells, and reveals specific variations of proteins expression during radioresistance formation, including collagen alpha-2 (I) chain (COL1A2) that is associated with a favorable prognosis in NPC and is negatively associated with DNA repair scores and DNA repair-related genes via bioinformatic analysis. Furthermore, deep learning model-based diagnostic model is generated to accurately identify the exosomes from radioresistance group. This work demonstrates the promising potential of exosomes as a novel biomarker for predicting the radioresistance and develops a rapid and sensitive liquid biopsy method that will provide a personalized and precise strategy for clinical NPC treatment.

Copyright © 2022 Wiley-VCH GmbH.

PMID

36528342 [<https://www.ncbi.nlm.nih.gov/pubmed/?term=36528342>]

Author NameID

Lin, Duo; ORCID: <https://orcid.org/0000-0001-6959-5995>

Institution

(Wu, Feng, Chen, Lin) Key Laboratory of OptoElectronic Science and Technology for Medicine, Ministry of Education, Fujian Provincial Key Laboratory for Photonics Technology, Fujian Normal University, Fujian, Fuzhou 350001, China (Wu) College of Physics and Electronic Information Engineering, Minjiang University, Fujian, Fuzhou 350001, China

(Ding, Weng, Chen, Qiu) Department of Radiation Oncology, Clinical Oncology School of Fujian Medical University, Fujian Cancer Hospital, Fujian, Fuzhou 350001, China

(Lin) Department of Radiation Oncology, Shanghai Proton and Heavy Ion Center, Fudan University Cancer Hospital, Shanghai 201321, China

Publisher

John Wiley and Sons Inc

Emtree Heading

article; *biosensor; cancer therapy; controlled study; deep learning; *exosome; human; human cell; liquid biopsy; *nasopharynx cancer; *protein fingerprinting; *radiosensitivity; radiotherapy; *surface enhanced Raman spectroscopy; *tumor cell; *biological marker.

Drug Index Terms

*biological marker [m].

Other Index Terms

article [m]; *biosensor [m]; cancer therapy [m]; controlled study [m]; deep learning [m]; *exosome [m]; human [m]; human cell [m]; liquid biopsy [m]; *nasopharynx cancer [m]; *protein fingerprinting [m]; *radiosensitivity [m]; radiotherapy [m]; *surface enhanced Raman spectroscopy [m]; *tumor cell [m].

Link to the Ovid Full Text or citation:

[Click here for full text options](https://ovidsp.ovid.com/ovidweb.cgi?T=JS&CSC=Y&NEWS=N&PAGE=fulltext&D=emexb&AN=2020843469)

Link to the External Link Resolver:

[SFX](https://sfx-86scu.hosted.exlibrisgroup.com.cn/86scu?sid=OVID:embase&id=pmid:36528342&id=doi:10.1002%2Fadhm.202202482&issn=21922640&isbn=&volume=&issue=&spage=&pages=&date=2022&title=Advanced+Healthcare+Materials&atitle=Profiling+of+Tumor+Cell-Delivered+Exosome+by+Surface+Enhanced+Raman+Spectroscopy-Based+Biosensor+for+Evaluation+of+Nasopharyngeal+Cancer+Radioresistance&aulast=Wu&pid=<author>Wu+Q.%3BDing+Q.%3BLin+W.%3BWeng+Y.%3BFeng+S.%3BChen+R.%3BChen+C.%3BQiu+S.%3BLin+D.<%2Fauthor><AN>2020843469<%2FAN><DT>Article<%2FDT>)

13.

Pump-free microfluidic chip based laryngeal squamous cell carcinoma-related microRNAs detection through the combination of surface-enhanced Raman scattering techniques and catalytic hairpin assembly amplification.

Ge S., Li G., Zhou X., Mao Y., Li Z., Gu Y., Cao X.

Talanta. 245 (pp 123478), 2022. Date of Publication: 12 Apr 2022.

AN: 637816171

MicroRNA (miRNA), as one of the ideal target biomarker analytes, plays an essential role in biological processes; thus, the development of rapidly sensitive detection methods is imperative. Herein, we proposed a pump-free surface-enhanced Raman scatting (SERS) microfluidic chip for the rapid and ultrasensitive detection of miR-106b and miR-196b, laryngeal squamous cell carcinoma (LSCC)-related miRNAs. Ag-Au core-shell nanorods (Ag-AuNRs) were applied to prepare SERS tags by modifying Raman reporters and hairpin DNAs. The capture probes were synthesized by labeling hairpin DNAs onto the magnetic beads (MBs) surface. In the presence of targets, the catalytic hairpin assembly (CHA) reactions between SERS tags and capture probes could be triggered, causing the aggregation of Ag-AuNRs. The tiny magnets installed under the rectangular chamber could magnetically gather the CHA products, leading to the further aggregation of Ag-AuNRs. Thus, this strategy could achieve the double aggregation of Ag-AuNRs, resulting in the significant amplification of the SERS signal. The proposed strategy achieved simultaneous and sensitive detection of miR-106b and miR-196b, with limits of detection low to aM level. The whole detection process could be completed within 5 min. Moreover, this microfluidic chip exhibited excellent reproducibility, stability, and specificity. The high accuracy of this SERS microfluidic chip was proved by practical analysis in LSCC patients' serum. The results demonstrated that SERS could be a promising alternative clinical diagnosis tool and exhibited potential application for the dynamic monitoring of cancer staging.

Copyright © 2022 Elsevier B.V. All rights reserved.

PMID

35436733 [<https://www.ncbi.nlm.nih.gov/pubmed/?term=35436733>]

Institution

(Ge, Zhou, Mao, Gu, Gu) Institute of Translational Medicine, Medical College, Yangzhou University, Yangzhou, 225001, PR China; Jiangsu Key Laboratory of Integrated Traditional Chinese and Western Medicine for Prevention and Treatment of Senile Diseases, Yangzhou University, Yangzhou, PR China; Jiangsu Key Laboratory of Experimental & Translational Noncoding RNA Research, Medical College, Yangzhou University, Yangzhou, China (Li) Department of Otorhinolaryngology-Head and Neck Surgery, Affiliated Hospital of Yangzhou University, Yangzhou University, Yangzhou 225001, China

(Li) First Clinical College, Dalian Medical University, Dalian, China

(Cao) Institute of Translational Medicine, Medical College, Yangzhou University, Yangzhou, 225001, PR China; Jiangsu Key Laboratory of Integrated Traditional Chinese and Western Medicine for Prevention and Treatment of Senile Diseases, Yangzhou University, Yangzhou, PR China; Jiangsu Key Laboratory of Experimental & Translational Noncoding RNA Research, Medical College, Yangzhou University, Yangzhou, China. Electronic address: cxw19861121@163.com

Publisher

NLM (Medline)

Emtree Heading

adult; article; cancer patient; cancer staging; *catalysis; controlled study; *gene amplification; human; human tissue; *lab on a chip; *larynx squamous cell carcinoma; limit of detection; magnet; reproducibility; *surface enhanced Raman spectroscopy; endogenous compound; gold; *microRNA.

Drug Index Terms

endogenous compound [m]; gold [m]; *microRNA [m].

Other Index Terms

adult [m]; article [m]; cancer patient [m]; cancer staging [m]; *catalysis [m]; controlled study [m]; *gene amplification [m]; human [m]; human tissue [m]; *lab on a chip [m]; *larynx squamous cell carcinoma [m]; limit of detection [m]; magnet [m]; reproducibility [m]; *surface enhanced Raman spectroscopy [m].

Link to the Ovid Full Text or citation:

[Click here for full text options](https://ovidsp.ovid.com/ovidweb.cgi?T=JS&CSC=Y&NEWS=N&PAGE=fulltext&D=emexb&AN=637816171)

Link to the External Link Resolver:

[SFX](https://sfx-86scu.hosted.exlibrisgroup.com.cn/86scu?sid=OVID:embase&id=pmid:35436733&id=doi:10.1016%2Fj.talanta.2022.123478&issn=18733573&isbn=&volume=245&issue=&spage=123478&pages=123478&date=2022&title=Talanta&atitle=Pump-free+microfluidic+chip+based+laryngeal+squamous+cell+carcinoma-related+microRNAs+detection+through+the+combination+of+surface-enhanced+Raman+scattering+techniques+and+catalytic+hairpin+assembly+amplification&aulast=Ge&pid=<author>Ge+S.%3BLi+G.%3BZhou+X.%3BMao+Y.%3BLi+Z.%3BGu+Y.%3BCao+X.<%2Fauthor><AN>637816171<%2FAN><DT>Article<%2FDT>)

14.

Label-Free Optical Spectroscopy for Early Detection of Oral Cancer.

Maryam S., Nogueira M.S., Gautam R., Krishnamoorthy S., Venkata Sekar S.K., Kho K.W., Lu H., Ni Riordain R., Feeley L., Sheahan P., Burke R., Andersson-Engels S.

Diagnostics. 12(12) (no pagination), 2022. Article Number: 2896. Date of Publication: December 2022.

AN: 2020779646

Oral cancer is the 16th most common cancer worldwide. It commonly arises from painless white or red plaques within the oral cavity. Clinical outcome is highly related to the stage when diagnosed. However, early diagnosis is complex owing to the impracticality of biopsying every potentially premalignant intraoral lesion. Therefore, there is a need to develop a non-invasive cost-effective diagnostic technique to differentiate non-malignant and early-stage malignant lesions. Optical spectroscopy may provide an appropriate solution to facilitate early detection of these lesions. It has many advantages over traditional approaches including cost, speed, objectivity, sensitivity, painlessness, and ease-of use in clinical setting for real-time diagnosis. This review consists of a comprehensive overview of optical spectroscopy for oral cancer diagnosis, epidemiology, and recent improvements in this field for diagnostic purposes. It summarizes major developments in label-free optical spectroscopy, including Raman, fluorescence, and diffuse reflectance spectroscopy during recent years. Among the wide range of optical techniques available, we chose these three for this review because they have the ability to provide biochemical information and show great potential for real-time deep-tissue point-based in vivo analysis. This review also highlights the importance of saliva-based potential biomarkers for non-invasive early-stage diagnosis. It concludes with the discussion on the scope of development and future demands from a clinical point of view.

Copyright © 2022 by the authors.

Author NameID

Nogueira, Marcelo Saito; ORCID: <https://orcid.org/0000-0002-5611-9620> Gautam, Rekha; ORCID: <https://orcid.org/0000-0002-1176-8491>

Venkata Sekar, Sanathana Konugolu; ORCID: <https://orcid.org/0000-0003-0912-1282>

Lu, Huihui; ORCID: <https://orcid.org/0000-0002-7038-202X>

Andersson-Engels, Stefan; ORCID: <https://orcid.org/0000-0001-5640-3122>

Ni Riordain, Richeal; ORCID: <https://orcid.org/0000-0002-1937-8105>

Institution

(Maryam, Nogueira, Gautam, Krishnamoorthy, Venkata Sekar, Kho, Lu, Burke, Andersson-Engels) Tyndall National Institute, University College Cork, Cork T12 R229, Ireland (Ni Riordain, Feeley, Sheahan) ENTO Research Institute, University College Cork, Cork T12 R229, Ireland

(Ni Riordain) Cork University Dental School and Hospital, Wilton, Cork T12 E8YV, Ireland

(Feeley) Cork University Hospital, Cork T12 DC4A, Ireland

(Sheahan) South Infirmary, Victoria University Hospital, Cork T12 X23H, Ireland

Publisher

MDPI

Emtree Heading

cancer diagnosis; cancer staging; clinical outcome; diagnosis; diagnostic procedure; *diffuse reflectance spectroscopy; early diagnosis; human; in vivo study; *mouth cancer; mouth cavity; mouth lesion; *optical spectroscopy; outcome assessment; *Raman spectrometry; review; *saliva analysis; *spectrofluorometry; velocity; *biological marker.

Drug Index Terms

*biological marker [m].

Other Index Terms

cancer diagnosis [m]; cancer staging [m]; clinical outcome [m]; diagnosis [m]; diagnostic procedure [m]; *diffuse reflectance spectroscopy [m]; early diagnosis [m]; human [m]; in vivo study [m]; *mouth cancer [m]; mouth cavity [m]; mouth lesion [m]; *optical spectroscopy [m]; outcome assessment [m]; *Raman spectrometry [m]; review [m]; *saliva analysis [m]; *spectrofluorometry [m]; velocity [m].

Link to the Ovid Full Text or citation:

[Click here for full text options](https://ovidsp.ovid.com/ovidweb.cgi?T=JS&CSC=Y&NEWS=N&PAGE=fulltext&D=emexa&AN=2020779646)

Link to the External Link Resolver:

[SFX](https://sfx-86scu.hosted.exlibrisgroup.com.cn/86scu?sid=OVID:embase&id=pmid:&id=doi:10.3390%2Fdiagnostics12122896&issn=20754418&isbn=&volume=12&issue=12&spage=2896&pages=&date=2022&title=Diagnostics&atitle=Label-Free+Optical+Spectroscopy+for+Early+Detection+of+Oral+Cancer&aulast=Maryam&pid=<author>Maryam+S.%3BNogueira+M.S.%3BGautam+R.%3BKrishnamoorthy+S.%3BVenkata+Sekar+S.K.%3BKho+K.W.%3BLu+H.%3BNi+Riordain+R.%3BFeeley+L.%3BSheahan+P.%3BBurke+R.%3BAndersson-Engels+S.<%2Fauthor><AN>2020779646<%2FAN><DT>Review<%2FDT>)

15.

Machine Learning of Raman Spectroscopy Data for Classifying Cancers: A Review of the Recent Literature.

Blake N., Gaifulina R., Griffin L.D., Bell I.M., Thomas G.M.H.

Diagnostics. 12(6) (no pagination), 2022. Article Number: 1491. Date of Publication: June 2022.

AN: 2017218051

Raman Spectroscopy has long been anticipated to augment clinical decision making, such as classifying oncological samples. Unfortunately, the complexity of Raman data has thus far inhibited their routine use in clinical settings. Traditional machine learning models have been used to help exploit this information, but recent advances in deep learning have the potential to improve the field. However, there are a number of potential pitfalls with both traditional and deep learning models. We conduct a literature review to ascertain the recent machine learning methods used to classify cancers using Raman spectral data. We find that while deep learning models are popular, and ostensibly outperform traditional learning models, there are many methodological considerations which may be leading to an over-estimation of performance; primarily, small sample sizes which compound suboptimal choices regarding sampling and validation strategies. Amongst several recommendations is a call to collate large benchmark Raman datasets, similar to those that have helped transform digital pathology, which researchers can use to develop and refine deep learning models.

Copyright © 2022 by the authors. Licensee MDPI, Basel, Switzerland.

Institution

(Blake, Gaifulina, Thomas) Department of Cell and Developmental Biology, University College London, London WC1E 6BT, United Kingdom (Griffin) Department of Computer Science, University College London, London WC1E 6BT, United Kingdom

(Bell) Spectroscopy Products Division, Renishaw plc, Wotton-under-Edge GL12 8JR, United Kingdom

Publisher

MDPI

Emtree Heading

brain cancer/di [Diagnosis]; breast cancer/di [Diagnosis]; *cancer classification; cancer diagnosis; convolutional neural network; cross validation; deep learning; digital pathology; female genital tract cancer/di [Diagnosis]; gastrointestinal cancer/di [Diagnosis]; human; lung cancer/di [Diagnosis]; *machine learning; *malignant neoplasm/di [Diagnosis]; mouth cancer/di [Diagnosis]; nasopharynx cancer/di [Diagnosis]; prostate cancer/di [Diagnosis]; *Raman spectrometry; review; sample size; skin cancer/di [Diagnosis]; validation process.

Other Index Terms

brain cancer / diagnosis; breast cancer / diagnosis; *cancer classification; cancer diagnosis; convolutional neural network; cross validation; deep learning; digital pathology; female genital tract cancer / diagnosis; gastrointestinal cancer / diagnosis; human; lung cancer / diagnosis; *machine learning; *malignant neoplasm / *diagnosis; mouth cancer / diagnosis; nasopharynx cancer / diagnosis; prostate cancer / diagnosis; *Raman spectrometry; Review; sample size; skin cancer / diagnosis; validation process.

Link to the Ovid Full Text or citation:

[Click here for full text options](https://ovidsp.ovid.com/ovidweb.cgi?T=JS&CSC=Y&NEWS=N&PAGE=fulltext&D=emexa&AN=2017218051)

Link to the External Link Resolver:

[SFX](https://sfx-86scu.hosted.exlibrisgroup.com.cn/86scu?sid=OVID:embase&id=pmid:&id=doi:10.3390%2Fdiagnostics12061491&issn=20754418&isbn=&volume=12&issue=6&spage=1491&pages=&date=2022&title=Diagnostics&atitle=Machine+Learning+of+Raman+Spectroscopy+Data+for+Classifying+Cancers%3A+A+Review+of+the+Recent+Literature&aulast=Blake&pid=<author>Blake+N.%3BGaifulina+R.%3BGriffin+L.D.%3BBell+I.M.%3BThomas+G.M.H.<%2Fauthor><AN>2017218051<%2FAN><DT>Review<%2FDT>)

16.

Multi-Modal Optical Imaging and Combined Phototherapy of Nasopharyngeal Carcinoma Based on a Nanoplatform.

Lin Y., Qiu T., Lan Y., Li Z., Wang X., Zhou M., Li Q., Li Y., Liang J., Zhang J.

International Journal of Nanomedicine. 17 (pp 2435-2446), 2022. Date of Publication: 2022.

AN: 2018803470

Nasopharyngeal carcinoma (NPC) is a common malignant tumor of the head and neck with a high incidence rate worldwide, especially in southern China. Phototheranostics in combination with nanoparticles is an integrated strategy for enabling simultaneous diagnosis, real-time monitoring, and administration of precision therapy for nasopharyngeal carcinoma (NPC). It has shown great potential in the field of cancer diagnosis and treatment owing to its unique noninvasive advantages. Many Chinese and international research teams have applied nano-targeted drugs to optical diagnosis and treatment technology to conduct multimodal imaging and collaborative treatment of NPC, which has become a hot research topic. In this review, we aimed to introduce the recent developments in phototheranostics of NPC based on a nanoplatform. This study aimed to elaborate on the applications of nanoplat-form-based optical imaging strategies and treatment modalities, including fluorescence imaging, photoacoustic imaging, Raman spectroscopy imaging, photodynamic therapy, and photothermal therapy. This study is expected to provide a scientific basis for further research and development of NPC diagnosis and treatment.

Copyright © 2022 Lin et al.

PMID

35656166 [<https://www.ncbi.nlm.nih.gov/pubmed/?term=35656166>]

Institution

(Lin, Li, Li, Li, Liang) Department of Radiology, DongGuan Tungwah Hospital, Guangdong, DongGuan 523000, China (Qiu) Department of Radiology, Zhuhai People's Hospital (Zhuhai Hospital Affiliated with Jinan University), Guangdong, Zhuhai 519000, China

(Lan, Zhou, Zhang) Department of Biomedical Engineering, School of Basic Medical Sciences, Guangzhou Medical University, Guangdong, Guangzhou 511436, China

(Wang, Zhang) Department of Oncology, The Sixth Affiliated Hospital of Guangzhou Medical University, Qingyuan People's Hospital, Guangdong, Qingyuan 511500, China

Publisher

Dove Medical Press Ltd

Emtree Heading

cancer diagnosis; diagnosis; *fluorescence imaging; human; multimodal imaging; *nasopharynx carcinoma; photoacoustics; photodynamic therapy; *phototherapy; photothermal therapy; Raman spectrometry; review; *nanochain.

Drug Index Terms

*nanochain [m].

Other Index Terms

cancer diagnosis [m]; diagnosis [m]; *fluorescence imaging [m]; human [m]; multimodal imaging [m]; *nasopharynx carcinoma [m]; photoacoustics [m]; photodynamic therapy [m]; *phototherapy [m]; photothermal therapy [m]; Raman spectrometry [m]; review [m].

Link to the Ovid Full Text or citation:

[Click here for full text options](https://ovidsp.ovid.com/ovidweb.cgi?T=JS&CSC=Y&NEWS=N&PAGE=fulltext&D=emexa&AN=2018803470)

Link to the External Link Resolver:

[SFX](https://sfx-86scu.hosted.exlibrisgroup.com.cn/86scu?sid=OVID:embase&id=pmid:35656166&id=doi:10.2147%2FIJN.S357493&issn=11769114&isbn=&volume=17&issue=&spage=2435&pages=2435-2446&date=2022&title=International+Journal+of+Nanomedicine&atitle=Multi-Modal+Optical+Imaging+and+Combined+Phototherapy+of+Nasopharyngeal+Carcinoma+Based+on+a+Nanoplatform&aulast=Lin&pid=<author>Lin+Y.%3BQiu+T.%3BLan+Y.%3BLi+Z.%3BWang+X.%3BZhou+M.%3BLi+Q.%3BLi+Y.%3BLiang+J.%3BZhang+J.<%2Fauthor><AN>2018803470<%2FAN><DT>Review<%2FDT>)

17.

Bimetallic Au-Pd nanoparticles/RGO as theranostic nanoplatform for photothermal therapy of throat cancer - an in vitro approach.

Henglei R., Chunli G., Min L., Liang Z.

Journal of Radiation Research and Applied Sciences. 15(4) (no pagination), 2022. Article Number: 100473. Date of Publication: December 2022.

AN: 2021213560

The current work showed the fabrication of bimetallic Au-Pd-NPs on reduced graphene oxide (RGO) sheets functionalized with plant polyphenols of Ziziphus ziziphus leaf extract for enhanced aqueous dispersibility using a simple green method. The synthesized Au-Pd/RGO nanocomposite was effectively employed for the in-vitro photothermal killing of HNE-1 cells. Applying the 808 nm laser (1 W cm-2) and maintaining the concentration of Au-Pd/RGO at 75 mug mL-1, the solution temperature was brought to 58 degreeC, which is adequate for the eradication of cancer cells. Later, the solution temperature was brought to 80 degreeC by increasing the concentrations to 90 mug mL-1. Ultimately, the near total photoablation (=97%) of HNE-1 cells was obtained by maintaining the concentration of Au-Pd-RGO nanocomposites at =20 mug mL-1, a laser power of 1 W cm-1 and a LC50 value of 7 mug mL-1. This exceptional efficiency was attributed mostly to the synergistic effect of Au-Pd NPs, and RGO. The current study might lead the way for the synthesis of advanced materials that could be used as prospective photothermal candidates for the ablation of various unregulated cells.

Copyright © 2022

Institution

(Henglei) Eye and Ent Hospital, China (Chunli, Min, Liang) Fudan University, China

Publisher

Egyptian Society of Radiation Science and Applications (ESRSA)

Emtree Heading

article; cancer cell; cancer therapy; controlled study; cytotoxicity assay; energy dispersive X ray spectroscopy; glioblastoma; HNE-1 cell line; human; human cell; hypoxia; LC50; microvascular thrombosis; MTS assay; MTT assay; *pharynx cancer; *photothermal therapy; Raman spectrometry; transmission electron microscopy; ultraviolet spectrophotometry; X ray diffraction; *gold nanoparticle/an [Drug Analysis]; *gold nanoparticle/cb [Drug Combination]; graphene oxide; nanocomposite; *palladium nanoparticle/an [Drug Analysis]; *palladium nanoparticle/cb [Drug Combination]; plant extract; polyphenol; laser.

Device Index Terms

laser.

Drug Index Terms

*gold nanoparticle / *drug analysis / *drug combination; graphene oxide; nanocomposite; *palladium nanoparticle / *drug analysis / *drug combination; plant extract; polyphenol.

Other Index Terms

Article; cancer cell; cancer therapy; controlled study; cytotoxicity assay; energy dispersive X ray spectroscopy; glioblastoma; HNE-1 cell line; human; human cell; hypoxia; LC50; microvascular thrombosis; MTS assay; MTT assay; *pharynx cancer; *photothermal therapy; Raman spectrometry; transmission electron microscopy; ultraviolet spectrophotometry; X ray diffraction.

Link to the Ovid Full Text or citation:

[Click here for full text options](https://ovidsp.ovid.com/ovidweb.cgi?T=JS&CSC=Y&NEWS=N&PAGE=fulltext&D=emexa&AN=2021213560)

Link to the External Link Resolver:

[SFX](https://sfx-86scu.hosted.exlibrisgroup.com.cn/86scu?sid=OVID:embase&id=pmid:&id=doi:10.1016%2Fj.jrras.2022.100473&issn=16878507&isbn=&volume=15&issue=4&spage=100473&pages=&date=2022&title=Journal+of+Radiation+Research+and+Applied+Sciences&atitle=Bimetallic+Au-Pd+nanoparticles%2FRGO+as+theranostic+nanoplatform+for+photothermal+therapy+of+throat+cancer+-+an+in+vitro+approach&aulast=Henglei&pid=<author>Henglei+R.%3BChunli+G.%3BMin+L.%3BLiang+Z.<%2Fauthor><AN>2021213560<%2FAN><DT>Article<%2FDT>)

18.

Clinical Use of Raman Spectroscopy Improves Diagnostic Accuracy for Indeterminate Thyroid Nodules.

Palermo A., Sodo A., Naciu A.M., Di Gioacchino M., Paolucci A., di Masi A., Maggi D., Crucitti P., Longo F., Perrella E., Taffon C., Verri M., Ricci M.A., Crescenzi A.

The Journal of clinical endocrinology and metabolism. 107(12) (pp 3309-3319), 2022. Date of Publication: 25 Nov 2022.

AN: 639027650

BACKGROUND AND OBJECTIVE: Molecular analysis of thyroid fine-needle aspiration (FNA) specimens is believed to improve the management of indeterminate nodules. Raman spectroscopy (RS) can differentiate benign and malignant thyroid lesions in surgically removed tissues, generating distinctive structural profiles. Herein, the diagnostic performance of RS was tested on FNA biopsies of thyroid gland. DESIGN: Prospective, blinded, and single-center study.

METHOD(S): We enrolled 123 patients with indeterminate or more ominous cytologic diagnoses (TIR3A-low-risk indeterminate lesion, TIR3B-high-risk indeterminate lesion, TIR4-suspicious of malignancy, TIR5-malignant). All subjects were surgical candidates (defined by international guidelines) and submitted to FNA procedures for RS analysis. We compared RS data, cytologic findings, and final histologic assessments (as reference standard) using various statistical techniques.

RESULT(S): The distribution of our study population was as follows: TIR3A:37, TIR3B:32, TIR4:16, and TIR5:38. In 30.9% of patients, histologic diagnoses were benign. For predicting thyroid malignancy in FNA samples, the overall specificity of RS was 86.8%, with 86.5% specificity in indeterminate cytologic categories. In patients with high-risk ultrasound categories, the specificity of RS increased to 87.5% for TIR3A, reaching 100% for TIR3B. Benign histologic diagnoses accounted for 72.9% of patients classified as TIR3A and 31.3% of those classified as TIR3B. Based on positive RS testing, unnecessary surgery was reduced to 7.4% overall (TIR3A-33.3%, TIR3B-6.7%).

CONCLUSION(S): This premier use of RS for thyroid cytology confirms its role as a valuable diagnostic tool and a valid alternative to molecular studies, capable of improving the management of indeterminate nodules and reducing unnecessary surgery.

Copyright © The Author(s) 2022. Published by Oxford University Press on behalf of the Endocrine Society. All rights reserved. For permissions, please e-mail: journals.permissions@oup.com.

PMID

36103268 [<https://www.ncbi.nlm.nih.gov/pubmed/?term=36103268>]

Author NameID

Naciu, Anda Mihaela; ORCID: <https://orcid.org/0000-0002-4576-3381> Palermo, Andrea; ORCID: <https://orcid.org/0000-0002-1143-4926>

Crescenzi, Anna; ORCID: <https://orcid.org/0000-0002-8156-5753>

Institution

(Palermo, Naciu) Unit of Metabolic Bone and Thyroid Disorders, Fondazione Policlinico Universitario Campus Bio-Medico ,Via Alvaro del Portillo, 200 - 00128 Roma, Italy (Palermo) Unit of Endocrinology and Diabetes, Department of Medicine and Surgery, Universita Campus Bio-Medico di Roma, Via Alvaro del Portillo, 21 - 00128 Roma, Italy

(Sodo, Di Gioacchino, Paolucci, di Masi, Ricci) Dipartimento di Scienze, Universita Roma Tre, Rome, Italy

(Maggi) Unit of Endocrinology and Diabetes, Fondazione Policlinico Universitario Campus Bio-Medico, Rome, Italy

(Crucitti, Longo) Unit of Thoracic Surgery, Fondazione Policlinico Universitario Campus Bio-Medico, Rome, Italy

(Perrella, Taffon, Verri, Crescenzi) Unit of Pathology, Fondazione Policlinico Universitario Campus Bio-Medico, Rome, Italy

Publisher

NLM (Medline)

Emtree Heading

fine needle aspiration biopsy; human; pathology; prospective study; Raman spectrometry; retrospective study; *thyroid nodule/di [Diagnosis]; *thyroid nodule/su [Surgery]; *thyroid tumor/di [Diagnosis]; *thyroid tumor/su [Surgery].

Other Index Terms

fine needle aspiration biopsy; human; pathology; prospective study; Raman spectrometry; retrospective study; *thyroid nodule / *diagnosis / *surgery; *thyroid tumor / *diagnosis / *surgery.

Link to the Ovid Full Text or citation:

[Click here for full text options](https://ovidsp.ovid.com/ovidweb.cgi?T=JS&CSC=Y&NEWS=N&PAGE=fulltext&D=emexa&AN=639027650)

Link to the External Link Resolver:

[SFX](https://sfx-86scu.hosted.exlibrisgroup.com.cn/86scu?sid=OVID:embase&id=pmid:36103268&id=doi:10.1210%2Fclinem%2Fdgac537&issn=19457197&isbn=&volume=107&issue=12&spage=3309&pages=3309-3319&date=2022&title=The+Journal+of+clinical+endocrinology+and+metabolism&atitle=Clinical+Use+of+Raman+Spectroscopy+Improves+Diagnostic+Accuracy+for+Indeterminate+Thyroid+Nodules&aulast=Palermo&pid=<author>Palermo+A.%3BSodo+A.%3BNaciu+A.M.%3BDi+Gioacchino+M.%3BPaolucci+A.%3Bdi+Masi+A.%3BMaggi+D.%3BCrucitti+P.%3BLongo+F.%3BPerrella+E.%3BTaffon+C.%3BVerri+M.%3BRicci+M.A.%3BCrescenzi+A.<%2Fauthor><AN>639027650<%2FAN><DT>Article<%2FDT>)

19.

New frontiers in microfluidics devices for miRNA analysis.

Khashayar P., Al-Madhagi S., Azimzadeh M., Scognamiglio V., Arduini F.

TrAC - Trends in Analytical Chemistry. 156 (no pagination), 2022. Article Number: 116706. Date of Publication: November 2022.

AN: 2018922280

miRNA detection using microfluidics-based devices is one of the most important innovations in biology and modern medicine. miRNAs are small regulatory molecules, whose varied concentrations can indicate diseases or pathologic conditions, boosting their use as reliable modern biomarkers for advanced medical diagnostics. Due to their small size and low concentration (from femtomolar to picomolar), miRNA measurement is quite challenging. Being rapid and affordable analytical devices for high-throughput quantification of miRNAs, microfluidics-based biosensors are promising. Beside the small volumes of required sample, simple handling, and manipulation of the sample, these tools enable amplification and detection of target miRNA/miRNAs in a single device, overcoming common limitations of conventional methodologies. Herein, we review the recent advancements in microfluidic devices applied for miRNA sample handling, manipulation, and measurement. We also discuss their advantages and limitations as well as future trends in this field.

Copyright © 2022

Institution

(Khashayar, Al-Madhagi) Center for Microsystems Technology, Imec and Ghent University, Ghent 9050, Belgium (Azimzadeh) Department of Medical Biotechnology, School of Medicine, Shahid Sadoughi University of Medical Sciences, Yazd 8915173143, Iran, Islamic Republic of

(Azimzadeh) Medical Nanotechnology & Tissue Engineering Research Center, Yazd Reproductive Sciences Institute, Shahid Sadoughi University of Medical Sciences, Yazd 89195-999, Iran, Islamic Republic of

(Azimzadeh) Stem Cell Biology Research Center, Yazd Reproductive Sciences Institute, Shahid Sadoughi University of Medical Sciences, Yazd 89195-999, Iran, Islamic Republic of

(Scognamiglio, Arduini) Institute of Crystallography, National Research Council, Department of Chemical Sciences and Materials Technologies, Via Salaria km 29.300, Monterotondo, Rome 00015, Italy

(Arduini) University of Rome "Tor Vergata", Department of Chemical Science and Technologies, Via della Ricerca Scientifica, Rome 00133, Italy

(Arduini) SENSE4MED, Via della Ricerca Scientifica, Rome 00133, Italy

Publisher

Elsevier B.V.

Emtree Heading

brain cancer; cardiovascular disease/di [Diagnosis]; chemoluminescence; CRISPR Cas system; droplet digital polymerase chain reaction; electrochemical detection; electrospray mass spectrometry; exosome; fluorescence; human; lung cancer; mass spectrometry; MCF-7 cell line; MDA-MB-231 cell line; *microfluidics; oral cancer cell line; pancreas cancer/di [Diagnosis]; paratuberculosis; polymerase chain reaction; real time reverse transcription polymerase chain reaction; review; sandwich ELISA; size exclusion chromatography; surface enhanced Raman spectroscopy; surface plasmon resonance; dimeticone; exonuclease/ec [Endogenous Compound]; glucose oxidase/ec [Endogenous Compound]; glypican 1; gold nanoparticle; hydrogel; *microRNA/ec [Endogenous Compound]; oligonucleotide/ec [Endogenous Compound]; peptide nucleic acid/ec [Endogenous Compound]; tetramethylammonium hydroxide; tumor marker; biosensor; field effect transistor; fluorescence microscope; lab on a chip; nucleic acid isolation kit; ultrasound transducer; voltage assisted liquid desorption electrospray ionization tandem mass spectrometry; exoEasy Maxi Kit.

Candidate Terms

voltage assisted liquid desorption electrospray ionization tandem mass spectrometry [other term] exoEasy Maxi Kit [device term]

Device Index Terms

biosensor; field effect transistor; fluorescence microscope; lab on a chip; nucleic acid isolation kit; ultrasound transducer.

Drug Index Terms

dimeticone; exonuclease / endogenous compound; glucose oxidase / endogenous compound; glypican 1; gold nanoparticle; hydrogel; *microRNA / *endogenous compound; oligonucleotide / endogenous compound; peptide nucleic acid / endogenous compound; tetramethylammonium hydroxide; tumor marker.

Other Index Terms

brain cancer; cardiovascular disease / diagnosis; chemoluminescence; CRISPR Cas system; droplet digital polymerase chain reaction; electrochemical detection; electrospray mass spectrometry; exosome; fluorescence; human; lung cancer; mass spectrometry; MCF-7 cell line; MDA-MB-231 cell line; *microfluidics; oral cancer cell line; pancreas cancer / diagnosis; paratuberculosis; polymerase chain reaction; real time reverse transcription polymerase chain reaction; Review; sandwich ELISA; size exclusion chromatography; surface enhanced Raman spectroscopy; surface plasmon resonance.

Link to the Ovid Full Text or citation:

[Click here for full text options](https://ovidsp.ovid.com/ovidweb.cgi?T=JS&CSC=Y&NEWS=N&PAGE=fulltext&D=emexa&AN=2018922280)

Link to the External Link Resolver:

[SFX](https://sfx-86scu.hosted.exlibrisgroup.com.cn/86scu?sid=OVID:embase&id=pmid:&id=doi:10.1016%2Fj.trac.2022.116706&issn=01659936&isbn=&volume=156&issue=&spage=116706&pages=&date=2022&title=TrAC+-+Trends+in+Analytical+Chemistry&atitle=New+frontiers+in+microfluidics+devices+for+miRNA+analysis&aulast=Khashayar&pid=<author>Khashayar+P.%3BAl-Madhagi+S.%3BAzimzadeh+M.%3BScognamiglio+V.%3BArduini+F.<%2Fauthor><AN>2018922280<%2FAN><DT>Review<%2FDT>)

20.

Effect of Paclitaxel Stereochemistry on X-ray-Triggered Release of Paclitaxel from CaWO4/Paclitaxel-Coloaded PEG-PLA Nanoparticles.

Sarkar K., Torregrossa-Allen S.E., Elzey B.D., Narayanan S., Langer M.P., Durm G.A., Won Y.-Y.

Molecular Pharmaceutics. 19(8) (pp 2776-2794), 2022. Date of Publication: 01 Aug 2022.

AN: 2019622171

For many locally advanced tumors, the chemotherapy-radiotherapy (CT-RT) combination ("chemoradiation") is currently the standard of care. Intratumoral (IT) CT-based chemoradiation has the potential to overcome the limitations of conventional systemic CT-RT (side effects). For maximizing the benefits of IT CT-RT, our laboratory has previously developed a radiation-controlled drug release formulation, in which anticancer drug paclitaxel (PTX) and radioluminescent CaWO4 (CWO) nanoparticles (NPs) are co-encapsulated with poly(ethylene glycol)-poly(lactic acid) (PEG-PLA) block copolymers ("PEG-PLA/CWO/PTX NPs"). These PEG-PLA/CWO/PTX NPs enable radiation-controlled release of PTX and are capable of producing sustained therapeutic effects lasting for at least one month following a single IT injection. The present article focuses on discussing our recent finding about the effect of the stereochemical structure of PTX on the efficacy of this PEG-PLA/CWO/PTX NP formulation. Stereochemical differences in two different PTX compounds ("PTX-S"from Samyang Biopharmaceuticals and "PTX-B"from Biotang) were characterized by 2D heteronuclear/homonuclear NMR, Raman spectroscopy, and circular dichroism measurements. The difference in PTX stereochemistry was found to significantly influence their water solubility (WS); PTX-S (WS = 4.69 mug/mL) is about 19 times more water soluble than PTX-B (WS = 0.25 mug/mL). The two PTX compounds showed similar cancer cell-killing performances in vitro when used as free drugs. However, the subtle stereochemical difference significantly influenced their X-ray-triggered release kinetics from the PEG-PLA/CWO/PTX NPs; the more water-soluble PTX-S was released faster than the less water-soluble PTX-B. This difference was manifested in the IT pharmacokinetics and eventually in the survival percentages of test animals (mice) treated with PEG-PLA/CWO/PTX NPs + X-rays in an in vivo human tumor xenograft study; at short times (<1 month), concurrent PEG-PLA/CWO/PTX-S NPs produced a greater tumor-suppression effect, whereas PEG-PLA/CWO/PTX-B NPs had a longer-lasting radio-sensitizing effect. This study demonstrates the importance of the stereochemistry of a drug in a therapy based on a controlled release formulation.

Copyright © 2022 American Chemical Society.

PMID

35834797 [<https://www.ncbi.nlm.nih.gov/pubmed/?term=35834797>]

Author NameID

Won, You-Yeon; ORCID: <https://orcid.org/0000-0002-8347-6375>

Institution

(Sarkar, Won) Davidson School of Chemical Engineering, Purdue University, West Lafayette, IN 47907, United States (Torregrossa-Allen, Elzey, Won) Purdue University Center of Cancer Research, West Lafayette, IN 47907, United States

(Elzey, Narayanan) Department of Comparative Pathobiology, Purdue University, West Lafayette, IN 47907, United States

(Langer) Department of Radiation Oncology, Indiana University School of Medicine, Indianapolis, IN 46202, United States

(Durm) Department of Medicine, Indiana University School of Medicine, Indianapolis, IN 46202, United States

Publisher

American Chemical Society

Emtree Heading

animal experiment; animal model; animal tissue; antineoplastic activity; article; cancer cell; cancer inhibition; cancer survival; carbon nuclear magnetic resonance; cell killing; chemoluminescence; chemoradiotherapy; circular dichroism; *controlled drug release; controlled release formulation; controlled study; drug blood level; drug cytotoxicity; drug degradation; drug efficacy; drug elimination; drug solubility; drug tumor level; female; gel permeation chromatography; head and neck cancer cell line; head and neck squamous cell carcinoma/dt [Drug Therapy]; head and neck squamous cell carcinoma/rt [Radiotherapy]; heteronuclear multiple quantum coherence; human; human cell; in vitro study; in vivo study; kinetics; mouse; nanoencapsulation; nonhuman; nuclear Overhauser effect; physical chemistry; proton nuclear magnetic resonance; radiosensitization; Raman spectrometry; *stereochemistry; transmission electron microscopy; tumor xenograft; water solubility; *X ray; *calcium derivative; copolymer; *macrogol; *paclitaxel/an [Drug Analysis]; *paclitaxel/cr [Drug Concentration]; *paclitaxel/dt [Drug Therapy]; *paclitaxel/tu [Intratumoral Drug Administration]; *paclitaxel/pr [Pharmaceutics]; *paclitaxel/pk [Pharmacokinetics]; *paclitaxel/pd [Pharmacology]; *polyglactin; *polymer nanoparticle; unclassified drug; *calcium tungstate.

Candidate Terms

*calcium tungstate [drug term]

Drug Index Terms

*calcium derivative; copolymer; *macrogol; *paclitaxel / *drug analysis / *drug concentration / *drug therapy / *intratumoral drug administration / *pharmaceutics / *pharmacokinetics / *pharmacology; *polyglactin; *polymer nanoparticle; unclassified drug.

Other Index Terms

animal experiment; animal model; animal tissue; antineoplastic activity; Article; cancer cell; cancer inhibition; cancer survival; carbon nuclear magnetic resonance; cell killing; chemoluminescence; chemoradiotherapy; circular dichroism; *controlled drug release; controlled release formulation; controlled study; drug blood level; drug cytotoxicity; drug degradation; drug efficacy; drug elimination; drug solubility; drug tumor level; female; gel permeation chromatography; head and neck cancer cell line; head and neck squamous cell carcinoma / drug therapy / radiotherapy; heteronuclear multiple quantum coherence; human; human cell; in vitro study; in vivo study; kinetics; mouse; nanoencapsulation; nonhuman; nuclear Overhauser effect; physical chemistry; proton nuclear magnetic resonance; radiosensitization; Raman spectrometry; *stereochemistry; transmission electron microscopy; tumor xenograft; water solubility; *X ray.

Link to the Ovid Full Text or citation:

[Click here for full text options](https://ovidsp.ovid.com/ovidweb.cgi?T=JS&CSC=Y&NEWS=N&PAGE=fulltext&D=emexa&AN=2019622171)

Link to the External Link Resolver:

[SFX](https://sfx-86scu.hosted.exlibrisgroup.com.cn/86scu?sid=OVID:embase&id=pmid:35834797&id=doi:10.1021%2Facs.molpharmaceut.2c00148&issn=15438384&isbn=&volume=19&issue=8&spage=2776&pages=2776-2794&date=2022&title=Molecular+Pharmaceutics&atitle=Effect+of+Paclitaxel+Stereochemistry+on+X-ray-Triggered+Release+of+Paclitaxel+from+CaWO4%2FPaclitaxel-Coloaded+PEG-PLA+Nanoparticles&aulast=Sarkar&pid=<author>Sarkar+K.%3BTorregrossa-Allen+S.E.%3BElzey+B.D.%3BNarayanan+S.%3BLanger+M.P.%3BDurm+G.A.%3BWon+Y.-Y.<%2Fauthor><AN>2019622171<%2FAN><DT>Article<%2FDT>)

21.

Sensitive SERS detection of oral squamous cell carcinoma-related miRNAs in saliva via a gold nanohexagon array coupled with hybridization chain reaction amplification.

Wang Y., Zhang Y., Du Q., Cao D., Lu X., Meng Z.

Analytical methods : advancing methods and applications. 14(44) (pp 4563-4575), 2022. Date of Publication: 18 Nov 2022.

AN: 639407185

In this work, a highly specific and sensitive method for the detection of dual miRNAs was successfully developed by a hybridization chain reaction (HCR) amplification coupled with surface-enhanced Raman scattering (SERS) on Au-Ag hollow nanoparticles (Au-Ag HNPs) and a gold nanohexagon (AuNH) array. Two Raman reporter-labelled and hairpin DNA-modified Au-Ag HNPs acted as SERS probes (Au-Ag HNPs@4-MBA@HP1-1, Au-Ag HNPs@4-MBA@HP2-1, Au-Ag HNPs@DTNB@HP1-2, and Au-Ag HNPs@DTNB@HP2-2), and the hairpin DNA-modified AuNH array acted as the capture substrate. The HCR process could be triggered by the presence of target miRNAs, and long DNA hybridization chains on the substrate were formed by self-assembly rapidly, causing significant signal enhancement. Using the mentioned strategy, a low detection limit (LOD) of 6.51 aM for miR-31 and 6.52 aM for miR-21 in human saliva were obtained, showing the biosensor's remarkable sensitivity. The proposed biosensor also displays a significant specificity in detecting target miRNAs by introducing different interfering factors. This method has been successfully applied to detect and identify miR-21 and miR-31 in saliva from oral squamous cell carcinoma (OSCC) patients and healthy subjects. The results were consistent with those of the traditional test method in detecting target miRNAs, which confirmed the good accuracy of our method. Hence, the new assay method has great potential to be a valuable platform for detecting miRNAs in the early diagnosis of OSCC.

PMID

36317581 [<https://www.ncbi.nlm.nih.gov/pubmed/?term=36317581>]

Author NameID

Meng, Zhibing; ORCID: <https://orcid.org/0000-0003-2402-6056>

Institution

(Wang, Du, Cao) Department of Neurosurgery, Affiliated Hospital of Yangzhou University, Yangzhou, Jiangsu 225000, China (Zhang) Graduate School of Dalian Medical University, Dalian, Liaoning 116011, China

(Lu) Department of Oncology, Affiliated Hospital of Yangzhou University, Yangzhou, Jiangsu 225000, China

(Meng) Department of Oral and Maxillofacial Surgery, Affiliated Hospital of Yangzhou University, Yangzhou, Jiangsu 225000, China

Publisher

NLM (Medline)

Emtree Heading

genetics; *head and neck tumor; human; *mouth tumor/di [Diagnosis]; saliva; *squamous cell carcinoma/di [Diagnosis]; 5,5' dithiobis(2 nitrobenzoic acid); DNA; gold; *microRNA; silver; 4-mercaptobutyramidine.

Candidate Terms

4-mercaptobutyramidine [drug term]

Drug Index Terms

5,5' dithiobis(2 nitrobenzoic acid); DNA; gold; *microRNA; silver.

Other Index Terms

genetics; *head and neck tumor; human; *mouth tumor / *diagnosis; saliva; *squamous cell carcinoma / *diagnosis.

Link to the Ovid Full Text or citation:

[Click here for full text options](https://ovidsp.ovid.com/ovidweb.cgi?T=JS&CSC=Y&NEWS=N&PAGE=fulltext&D=emexa&AN=639407185)

Link to the External Link Resolver:

[SFX](https://sfx-86scu.hosted.exlibrisgroup.com.cn/86scu?sid=OVID:embase&id=pmid:36317581&id=doi:10.1039%2Fd2ay01180h&issn=17599679&isbn=&volume=14&issue=44&spage=4563&pages=4563-4575&date=2022&title=Analytical+methods+%3A+advancing+methods+and+applications&atitle=Sensitive+SERS+detection+of+oral+squamous+cell+carcinoma-related+miRNAs+in+saliva+via+a+gold+nanohexagon+array+coupled+with+hybridization+chain+reaction+amplification&aulast=Wang&pid=<author>Wang+Y.%3BZhang+Y.%3BDu+Q.%3BCao+D.%3BLu+X.%3BMeng+Z.<%2Fauthor><AN>639407185<%2FAN><DT>Article<%2FDT>)

22.

Machine-learning-assisted spontaneous Raman spectroscopy classification and feature extraction for the diagnosis of human laryngeal cancer.

Li Z., Chen Q., Zhang J., Dunham M.E., McWhorter A.J., Feng J.-M., Li Y., Yao S., Xu J.

Computers in Biology and Medicine. 146 (no pagination), 2022. Article Number: 105617. Date of Publication: July 2022.

AN: 2018260768

The early detection of laryngeal cancer significantly increases the survival rates, permits more conservative larynx sparing treatments, and reduces healthcare costs. A non-invasive optical form of biopsy for laryngeal carcinoma can increase the early detection rate, allow for more accurate monitoring of its recurrence, and improve intraoperative margin control. In this study, we evaluated a Raman spectroscopy system for the rapid intraoperative detection of human laryngeal carcinoma. The spectral analysis methods included principal component analysis (PCA), random forest (RF), and one-dimensional (1D) convolutional neural network (CNN) methods. We measured the Raman spectra from 207 normal and 500 tumor sites collected from 10 human laryngeal cancer surgical specimens. Random Forest analysis yielded an overall accuracy of 90.5%, sensitivity of 88.2%, and specificity of 92.8% on average over 10 trials. The 1D CNN demonstrated the highest performance with an accuracy of 96.1%, sensitivity of 95.2%, and specificity of 96.9% on average over 50 trials. In predicting the first three principal components (PCs) of normal and tumor data, both RF and CNN demonstrated high performances, except for the tumor PC2. This is the first study in which CNN-assisted Raman spectroscopy was used to identify human laryngeal cancer tissue with extracted feature weights. The proposed Raman spectroscopy feature extraction approach has not been previously applied to human cancer diagnosis. Raman spectroscopy, as assisted by machine learning (ML) methods, has the potential to serve as an intraoperative, non-invasive tool for the rapid diagnosis of laryngeal cancer and margin detection.

Copyright © 2022 Elsevier Ltd

PMID

35605486 [<https://www.ncbi.nlm.nih.gov/pubmed/?term=35605486>]

Author NameID

Li, Zheng; ORCID: <https://orcid.org/0000-0001-9511-0701>

Institution

(Li, Li, Xu) Division of Electrical and Computer Engineering, College of Engineering, Louisiana State University, Baton Rouge, LA 70803, United States (Chen, Zhang) Division of Computer Science & Engineering, College of Engineering, Louisiana State University, Baton Rouge, LA 70803, United States

(Dunham, McWhorter) Department of Otolaryngology, School of Medicine, Louisiana State University Health Science Center, New Orleans, LA 70112, United States

(Feng, Yao) Department of Comparative Biomedical Science, School of Veterinary Medicine, Louisiana State University, Baton Rouge, LA 70803, United States

(Li) School of Environment and Sustainability, University of Saskatchewan, Saskatoon, SK S7N 5C9, Canada

Publisher

Elsevier Ltd

Emtree Heading

area under the curve; article; *cancer diagnosis; clinical article; clinical evaluation; controlled study; *convolutional neural network; diagnostic accuracy; diagnostic test accuracy study; *feature extraction; human; human tissue; *larynx cancer/di [Diagnosis]; larynx carcinoma; principal component analysis; *Raman spectrometry; random forest; receiver operating characteristic; sensitivity and specificity; survival rate; computer; data analysis software; diode laser; operating room; spectrometer.

Device Index Terms

computer; data analysis software; diode laser; operating room; spectrometer.

Other Index Terms

area under the curve; Article; *cancer diagnosis; clinical article; clinical evaluation; controlled study; *convolutional neural network; diagnostic accuracy; diagnostic test accuracy study; *feature extraction; human; human tissue; *larynx cancer / *diagnosis; larynx carcinoma; principal component analysis; *Raman spectrometry; random forest; receiver operating characteristic; sensitivity and specificity; survival rate.

Link to the Ovid Full Text or citation:

[Click here for full text options](https://ovidsp.ovid.com/ovidweb.cgi?T=JS&CSC=Y&NEWS=N&PAGE=fulltext&D=emexa&AN=2018260768)

Link to the External Link Resolver:

[SFX](https://sfx-86scu.hosted.exlibrisgroup.com.cn/86scu?sid=OVID:embase&id=pmid:35605486&id=doi:10.1016%2Fj.compbiomed.2022.105617&issn=00104825&isbn=&volume=146&issue=&spage=105617&pages=&date=2022&title=Computers+in+Biology+and+Medicine&atitle=Machine-learning-assisted+spontaneous+Raman+spectroscopy+classification+and+feature+extraction+for+the+diagnosis+of+human+laryngeal+cancer&aulast=Li&pid=<author>Li+Z.%3BChen+Q.%3BZhang+J.%3BDunham+M.E.%3BMcWhorter+A.J.%3BFeng+J.-M.%3BLi+Y.%3BYao+S.%3BXu+J.<%2Fauthor><AN>2018260768<%2FAN><DT>Article<%2FDT>)

23.

Fused Raman spectroscopic analysis of blood and saliva delivers high accuracy for head and neck cancer diagnostics.

Koster H.J., Guillen-Perez A., Gomez-Diaz J.S., Navas-Moreno M., Birkeland A.C., Carney R.P.

Scientific reports. 12(1) (pp 18464), 2022. Date of Publication: 02 Nov 2022.

AN: 639432121

As a rapid, label-free, non-destructive analytical measurement requiring little to no sample preparation, Raman spectroscopy shows great promise for liquid biopsy cancer detection and diagnosis. We carried out Raman analysis and mass spectrometry of plasma and saliva from more than 50 subjects in a cohort of head and neck cancer patients and benign controls (e.g., patients with benign oral masses). Unsupervised data models were built to assess diagnostic performance. Raman spectra collected from either biofluid provided moderate performance to discriminate cancer samples. However, by fusing together the Raman spectra of plasma and saliva for each patient, subsequent analytical models delivered an impressive sensitivity, specificity, and accuracy of 96.3%, 85.7%, and 91.7%, respectively. We further confirmed that the metabolites driving the differences in Raman spectra for our models are among the same ones that drive mass spectrometry models, unifying the two techniques and validating the underlying ability of Raman to assess metabolite composition. This study bolsters the relevance of Raman to provide additive value by probing the unique chemical compositions across biofluid sources. Ultimately, we show that a simple data augmentation routine of fusing plasma and saliva spectra provided significantly higher clinical value than either biofluid alone, pushing forward the potential of clinical translation of Raman spectroscopy for liquid biopsy cancer diagnostics.

Copyright © 2022. The Author(s).

PMID

36323705 [<https://www.ncbi.nlm.nih.gov/pubmed/?term=36323705>]

Institution

(Koster, Carney) Biomedical Engineering, University of California, Davis, CA, United States (Guillen-Perez, Gomez-Diaz) Electrical and Computer Engineering, University of California, Davis, CA, United States

(Navas-Moreno) BroomfieldCOUnited States

(Birkeland) Department of Otolaryngology, University of California, Davis, CA, United States

Publisher

NLM (Medline)

Emtree Heading

*head and neck tumor/di [Diagnosis]; human; procedures; *Raman spectrometry; saliva; specimen handling.

Other Index Terms

*head and neck tumor / *diagnosis; human; procedures; *Raman spectrometry; saliva; specimen handling.

Link to the Ovid Full Text or citation:

[Click here for full text options](https://ovidsp.ovid.com/ovidweb.cgi?T=JS&CSC=Y&NEWS=N&PAGE=fulltext&D=emexa&AN=639432121)

Link to the External Link Resolver:

[SFX](https://sfx-86scu.hosted.exlibrisgroup.com.cn/86scu?sid=OVID:embase&id=pmid:36323705&id=doi:10.1038%2Fs41598-022-22197-x&issn=20452322&isbn=&volume=12&issue=1&spage=18464&pages=18464&date=2022&title=Scientific+reports&atitle=Fused+Raman+spectroscopic+analysis+of+blood+and+saliva+delivers+high+accuracy+for+head+and+neck+cancer+diagnostics&aulast=Koster&pid=<author>Koster+H.J.%3BGuillen-Perez+A.%3BGomez-Diaz+J.S.%3BNavas-Moreno+M.%3BBirkeland+A.C.%3BCarney+R.P.<%2Fauthor><AN>639432121<%2FAN><DT>Article<%2FDT>)

24.

Raman spectroscopy in oral cavity and oropharyngeal cancer: a systematic review.

Faur C.I., Falamas A., Chirila M., Roman R.C., Rotaru H., Moldovan M.A., Albu S., Baciut M., Robu I., Hedesiu M.

International Journal of Oral and Maxillofacial Surgery. 51(11) (pp 1373-1381), 2022. Date of Publication: November 2022.

AN: 2017212618

Due to the high incidence of head and neck cancer and under-diagnosis in the early stages, non-invasive and highly accurate diagnostic tests are required for cancer detection. Recent advances in Raman spectroscopy techniques have yielded promising sensitivity and specificity results in the evaluation of cancer. The aim of this study was to investigate the potential value of Raman spectroscopy in oral cavity and oropharyngeal cancer diagnosis based on currently available scientific papers. A search of the PubMed database was performed using a specific strategy and according to the PRISMA guidelines. Raman spectroscopy achieved a maximum accuracy of 98% in cancer detection, while accuracy was 97.24% for tumour grading evaluation, 95% for cancer treatment assessment, and 77% for the detection of cancer recurrence. Moreover, early-stage cancer can be identified by Raman spectroscopy investigation of liquid biopsy samples. An in vivo technique with direct mucosa examination by fibre-optic Raman spectroscopy obtained a maximum accuracy of 94% in cancer diagnosis. The most prominent markers of the presence of malignancy were an increase in Raman signal intensity for proteins, nucleic acids, and water and a decrease for lipids. These cancer discriminants were detected in both fingerprint and high wavenumber regions. In conclusion, Raman spectroscopy is a promising tool for oral cavity and oropharyngeal cancer screening.

Copyright © 2022 International Association of Oral and Maxillofacial Surgeons

PMID

35282942 [<https://www.ncbi.nlm.nih.gov/pubmed/?term=35282942>]

Author NameID

Faur C.I.; ORCID: <https://orcid.org/0000-0001-9808-5580> Chirila M.; ORCID: <https://orcid.org/0000-0002-3771-6614>

Rotaru H.; ORCID: <https://orcid.org/0000-0003-2138-3322>

Institution

(Faur, Hedesiu) Department of Oral Radiology, Iuliu Hatieganu University of Medicine and Pharmacy, Cluj-Napoca, Romania (Falamas) Department of Molecular and Biomolecular Physics, National Institute for Research and Development of Isotopic and Molecular Technologies, Cluj-Napoca, Romania

(Chirila) Department of Otorhinolaryngology, Iuliu Hatieganu University of Medicine and Pharmacy, Cluj-Napoca, Romania

(Roman, Rotaru, Moldovan, Albu) Department of Oral and Craniomaxillofacial Surgery, Iuliu Hatieganu University of Medicine and Pharmacy, Cluj-Napoca, Romania

(Baciut) Department of Maxillofacial Surgery and Implantology, Iuliu Hatieganu University of Medicine and Pharmacy Cluj-Napoca, Romania

(Robu) Doctoral School, Iuliu Hatieganu University of Medicine and Pharmacy, Cluj-Napoca, Romania

Publisher

Churchill Livingstone

Emtree Heading

biochemical analysis; *cancer diagnosis; cancer grading; cancer recurrence; cancer therapy; diagnostic accuracy; diagnostic test accuracy study; early cancer diagnosis; human; liquid biopsy; *mouth cancer/di [Diagnosis]; oral biopsy; *oropharynx cancer/di [Diagnosis]; practice guideline; *Raman spectrometry; review; systematic review; carotenoid/ec [Endogenous Compound]; lipid/ec [Endogenous Compound]; nucleic acid/ec [Endogenous Compound]; protein/ec [Endogenous Compound].

Drug Index Terms

carotenoid / endogenous compound; lipid / endogenous compound; nucleic acid / endogenous compound; protein / endogenous compound.

Other Index Terms

biochemical analysis; *cancer diagnosis; cancer grading; cancer recurrence; cancer therapy; diagnostic accuracy; diagnostic test accuracy study; early cancer diagnosis; human; liquid biopsy; *mouth cancer / *diagnosis; oral biopsy; *oropharynx cancer / *diagnosis; practice guideline; *Raman spectrometry; Review; systematic review.

Link to the Ovid Full Text or citation:

[Click here for full text options](https://ovidsp.ovid.com/ovidweb.cgi?T=JS&CSC=Y&NEWS=N&PAGE=fulltext&D=emexa&AN=2017212618)

Link to the External Link Resolver:

[SFX](https://sfx-86scu.hosted.exlibrisgroup.com.cn/86scu?sid=OVID:embase&id=pmid:35282942&id=doi:10.1016%2Fj.ijom.2022.02.015&issn=09015027&isbn=&volume=51&issue=11&spage=1373&pages=1373-1381&date=2022&title=International+Journal+of+Oral+and+Maxillofacial+Surgery&atitle=Raman+spectroscopy+in+oral+cavity+and+oropharyngeal+cancer%3A+a+systematic+review&aulast=Faur&pid=<author>Faur+C.I.%3BFalamas+A.%3BChirila+M.%3BRoman+R.C.%3BRotaru+H.%3BMoldovan+M.A.%3BAlbu+S.%3BBaciut+M.%3BRobu+I.%3BHedesiu+M.<%2Fauthor><AN>2017212618<%2FAN><DT>Review<%2FDT>)

25.

Simulated fine-needle aspiration diagnosis of follicular thyroid nodules by hyperspectral Raman microscopy and chemometric analysis.

Soares de Oliveira M.A., Campbell M., Afify A.M., Huang E.C., Chan J.W.

Journal of biomedical optics. 27(9) (no pagination), 2022. Date of Publication: 01 Sep 2022.

AN: 638967989

SIGNIFICANCE: Follicular thyroid carcinoma carries a substantially poor prognosis due to its unique biological behavior and less favorable outcomes. In particular, fine-needle aspiration (FNA) biopsies, which play a key role in screening thyroid nodules, cannot differentiate benign from malignant follicular neoplasm. AIM: We report on the use of hyperspectral Raman microscopy in combination with chemometric analysis for identifying and classifying single cells obtained from clinical samples of human follicular thyroid neoplasms. APPROACH: We used a method intended to simulate the FNA procedure to obtain single cells from thyroid nodules. A total of 392 hyperspectral Raman images of single cells from follicular thyroid neoplasms were collected.

RESULT(S): Malignant cells were identified based on their intrinsic Raman spectral signatures with an overall diagnostic accuracy of up to 83.7%.

CONCLUSION(S): Our findings indicate that hyperspectral Raman microscopy can potentially be developed into an ancillary test for analyzing single cells from thyroid FNA biopsies to better stratify "indeterminate" nodules and other cytologically challenging cases.

PMID

36071559 [<https://www.ncbi.nlm.nih.gov/pubmed/?term=36071559>]

Institution

(Soares de Oliveira, Afify, Chan) University of California Davis, Department of Pathology and Laboratory Medicine, Sacramento, CA, United States (Campbell) University of California Davis, Department of Surgery, Sacramento, CA, United States

(Huang) University of Washington, Department of Laboratory Medicine and Pathology, Seattle, WA, United States

Publisher

NLM (Medline)

Emtree Heading

chemometrics; diagnostic imaging; fine needle aspiration biopsy; human; microscopy; pathology; *thyroid nodule; *thyroid tumor.

Other Index Terms

chemometrics; diagnostic imaging; fine needle aspiration biopsy; human; microscopy; pathology; *thyroid nodule; *thyroid tumor.

Link to the Ovid Full Text or citation:

[Click here for full text options](https://ovidsp.ovid.com/ovidweb.cgi?T=JS&CSC=Y&NEWS=N&PAGE=fulltext&D=emed23&AN=638967989)

Link to the External Link Resolver:

[SFX](https://sfx-86scu.hosted.exlibrisgroup.com.cn/86scu?sid=OVID:embase&id=pmid:36071559&id=doi:10.1117%2F1.JBO.27.9.095001&issn=15602281&isbn=&volume=27&issue=9&spage=&pages=&date=2022&title=Journal+of+biomedical+optics&atitle=Simulated+fine-needle+aspiration+diagnosis+of+follicular+thyroid+nodules+by+hyperspectral+Raman+microscopy+and+chemometric+analysis&aulast=Soares+de+Oliveira&pid=<author>Soares+de+Oliveira+M.A.%3BCampbell+M.%3BAfify+A.M.%3BHuang+E.C.%3BChan+J.W.<%2Fauthor><AN>638967989<%2FAN><DT>Article<%2FDT>)

26.

Raman Spectroscopy: A Potential Diagnostic Tool for Oral Diseases.

Zhang Y., Ren L., Wang Q., Wen Z., Liu C., Ding Y.

Frontiers in cellular and infection microbiology. 12 (pp 775236), 2022. Date of Publication: 2022.

AN: 637310878

Oral diseases impose a major health burden worldwide and have a profound effect on general health. Dental caries, periodontal diseases, and oral cancers are the most common oral health conditions. Their occurrence and development are related to oral microbes, and effective measures for their prevention and the promotion of oral health are urgently needed. Raman spectroscopy detects molecular vibration information by collecting inelastic scattering light, allowing a "fingerprint" of a sample to be acquired. It provides the advantages of rapid, sensitive, accurate, and minimally invasive detection as well as minimal interference from water in the "fingerprint region." Owing to these characteristics, Raman spectroscopy has been used in medical detection in various fields to assist diagnosis and evaluate prognosis, such as detecting and differentiating between bacteria or between neoplastic and normal brain tissues. Many oral diseases are related to oral microbial dysbiosis, and their lesions differ from normal tissues in essential components. The colonization of keystone pathogens, such as Porphyromonas gingivalis, resulting in microbial dysbiosis in subgingival plaque, is the main cause of periodontitis. Moreover, the components in gingival crevicular fluid, such as infiltrating inflammatory cells and tissue degradation products, are markedly different between individuals with and without periodontitis. Regarding dental caries, the compositions of decayed teeth are transformed, accompanied by an increase in acid-producing bacteria. In oral cancers, the compositions and structures of lesions and normal tissues are different. Thus, the changes in bacteria and the components of saliva and tissue can be used in examinations as special markers for these oral diseases, and Raman spectroscopy has been acknowledged as a promising measure for detecting these markers. This review summarizes and discusses key research and remaining problems in this area. Based on this, suggestions for further study are proposed.

Copyright © 2022 Zhang, Ren, Wang, Wen, Liu and Ding.

PMID

35186787 [<https://www.ncbi.nlm.nih.gov/pubmed/?term=35186787>]

Institution

(Zhang, Ren, Liu, Ding) State Key Laboratory of Oral Diseases, National Clinical Research Center for Oral Diseases, Department of Periodontics, West China Hospital of Stomatology, Sichuan University, Chengdu, China (Wang) State Key Laboratory of Oral Diseases, National Clinical Research Center for Oral Diseases, Department of Prosthodontics, West China Hospital of Stomatology, Sichuan University, Chengdu, China

(Wen) College of Chemistry, Sichuan University, Chengdu, China

Publisher

NLM (Medline)

Emtree Heading

*dental caries/di [Diagnosis]; dysbiosis; human; microbiology; *periodontitis; Porphyromonas gingivalis; Raman spectrometry.

Other Index Terms

*dental caries / *diagnosis; dysbiosis; human; microbiology; *periodontitis; Porphyromonas gingivalis; Raman spectrometry.

Link to the Ovid Full Text or citation:

[Click here for full text options](https://ovidsp.ovid.com/ovidweb.cgi?T=JS&CSC=Y&NEWS=N&PAGE=fulltext&D=emed23&AN=637310878)

Link to the External Link Resolver:

[SFX](https://sfx-86scu.hosted.exlibrisgroup.com.cn/86scu?sid=OVID:embase&id=pmid:35186787&id=doi:10.3389%2Ffcimb.2022.775236&issn=22352988&isbn=&volume=12&issue=&spage=775236&pages=775236&date=2022&title=Frontiers+in+cellular+and+infection+microbiology&atitle=Raman+Spectroscopy%3A+A+Potential+Diagnostic+Tool+for+Oral+Diseases&aulast=Zhang&pid=<author>Zhang+Y.%3BRen+L.%3BWang+Q.%3BWen+Z.%3BLiu+C.%3BDing+Y.<%2Fauthor><AN>637310878<%2FAN><DT>Review<%2FDT>)

27.

Utilization of Raman spectroscopy in biochemical fingerprint analysis for oral cancer screening and diagnosis.

Sundramoorthy A.K., Atchudan R., Arya S.

Oral Oncology. 135 (no pagination), 2022. Article Number: 106192. Date of Publication: December 2022.

AN: 2020762616

PMID

36270203 [<https://www.ncbi.nlm.nih.gov/pubmed/?term=36270203>]

Institution

(Sundramoorthy) Centre for Nano-Biosensors, Department of Prosthodontics, Saveetha Dental College and Hospitals, Saveetha Institute of Medical and Technical Sciences, Tamil Nadu, Chennai 600077, India (Atchudan) School of Chemical Engineering, Yeungnam University, Gyeongsan 38541, South Korea

(Arya) Department of Physics, University of Jammu, Jammu and Kashmir, Jammu 180006, India

Publisher

Elsevier Ltd

Emtree Heading

bandwidth; *biochemical analysis; *cancer cell; *cancer screening; connective tissue; dentin; enamel; gingiva; gingivitis; human; letter; light; *mouth cancer/di [Diagnosis]; mouth epithelium; optical coherence tomography; *Raman spectrometry; soft tissue; tooth tissue; laser; spectrometer.

Device Index Terms

laser; spectrometer.

Other Index Terms

bandwidth; *biochemical analysis; *cancer cell; *cancer screening; connective tissue; dentin; enamel; gingiva; gingivitis; human; Letter; light; *mouth cancer / *diagnosis; mouth epithelium; optical coherence tomography; *Raman spectrometry; soft tissue; tooth tissue.

Link to the Ovid Full Text or citation:

[Click here for full text options](https://ovidsp.ovid.com/ovidweb.cgi?T=JS&CSC=Y&NEWS=N&PAGE=fulltext&D=emed23&AN=2020762616)

Link to the External Link Resolver:

[SFX](https://sfx-86scu.hosted.exlibrisgroup.com.cn/86scu?sid=OVID:embase&id=pmid:36270203&id=doi:10.1016%2Fj.oraloncology.2022.106192&issn=13688375&isbn=&volume=135&issue=&spage=106192&pages=&date=2022&title=Oral+Oncology&atitle=Utilization+of+Raman+spectroscopy+in+biochemical+fingerprint+analysis+for+oral+cancer+screening+and+diagnosis&aulast=Sundramoorthy&pid=<author>Sundramoorthy+A.K.%3BAtchudan+R.%3BArya+S.<%2Fauthor><AN>2020762616<%2FAN><DT>Letter<%2FDT>)

28.

Diagnostic accuracy of Raman spectroscopy in oral squamous cell carcinoma.

Han R., Lin N., Huang J., Ma X.

Frontiers in Oncology. 12 (no pagination), 2022. Article Number: 925032. Date of Publication: 05 Aug 2022.

AN: 2018703719

Background: Raman spectroscopy (RS) has shown great potential in the diagnosis of oral squamous cell carcinoma (OSCC). Although many single-central original studies have been carried out, it is difficult to use RS in real clinical settings based on the current limited evidence. Herein, we conducted this meta-analysis of diagnostic studies to evaluate the overall performance of RS in OSCC diagnosis.

Method(s): We systematically searched databases including Medline, Embase, and Web of Science for studies up to March 2022 with no start date limited. Data of true positives, true negatives, false positives, and false negatives were extracted from the included studies to calculate the pooled sensitivity, specificity, accuracy, positive and negative likelihood ratios (LRs), and diagnostic odds ratio (DOR) with 95% confidence intervals, then we plotted the summary receiver operating characteristic (SROC) curve and the area under the curve (AUC) to evaluate the overall performance of RS. Quality assessments and publication bias were evaluated by Quality Assessment of Diagnostic Accuracy Studies 2 (QUADAS-2) checklist in Review Manager 5.3. The statistical parameters were calculated with StataSE version 12 and MetaDiSc 1.4.

Result(s): In total, 13 studies were included in our meta-analysis. The pooled diagnostic sensitivity and specificity of RS in OSCC were 0.89 (95% CI, 0.85-0.92) and 0.84 (95% CI, 0.78-0.89). The AUC of SROC curve was 0.93 (95% CI, 0.91-0.95).

Conclusion(s): RS is a non-invasive diagnostic technology with high specificity and sensitivity for detecting OSCC and has the potential to be applied clinically.

Copyright © 2022 Han, Lin, Huang and Ma.

Institution

(Han) State Key Laboratory of Oral Diseases, National Clinical Research Center for Oral Diseases, Sichuan University, Chengdu, China (Lin, Ma) Department of Biotherapy, West China Hospital and State Key Laboratory of Biotherapy, Sichuan University, Chengdu, China

(Huang) Department of Hematology, Sichuan Academy of Medical Sciences, Sichuan Provincial People's Hospital, University of Electronic Science and Technology of China, Chengdu, China

Publisher

Frontiers Media S.A.

Emtree Heading

area under the curve; article; controlled study; *diagnostic accuracy; diagnostic test accuracy study; human; meta analysis; *mouth squamous cell carcinoma; *Raman spectrometry; receiver operating characteristic; sensitivity and specificity.

Other Index Terms

area under the curve; Article; controlled study; *diagnostic accuracy; diagnostic test accuracy study; human; meta analysis; *mouth squamous cell carcinoma; *Raman spectrometry; receiver operating characteristic; sensitivity and specificity.

Link to the Ovid Full Text or citation:

[Click here for full text options](https://ovidsp.ovid.com/ovidweb.cgi?T=JS&CSC=Y&NEWS=N&PAGE=fulltext&D=emed23&AN=2018703719)

Link to the External Link Resolver:

[SFX](https://sfx-86scu.hosted.exlibrisgroup.com.cn/86scu?sid=OVID:embase&id=pmid:&id=doi:10.3389%2Ffonc.2022.925032&issn=2234943X&isbn=&volume=12&issue=&spage=925032&pages=&date=2022&title=Frontiers+in+Oncology&atitle=Diagnostic+accuracy+of+Raman+spectroscopy+in+oral+squamous+cell+carcinoma&aulast=Han&pid=<author>Han+R.%3BLin+N.%3BHuang+J.%3BMa+X.<%2Fauthor><AN>2018703719<%2FAN><DT>Article<%2FDT>)

29.

The Year in Surgical Thyroidology: Recent Technological Developments and Future Challenges.

Tufano R.P., Mohamed Ali K.

Thyroid. 32(1) (pp 14-18), 2022. Date of Publication: 01 Jan 2022.

AN: 637070816

Background: The field of surgical and interventional thyroidology is rapidly evolving. In the past few years, we have seen the introduction and establishment of many novel surgical adjuncts, techniques, and disruptive ablative technologies that have impacted the field.

Method(s): We identified the most influential articles on technological developments in surgical and interventional thyroidology that were published from September 1, 2020, to August 1, 2021. We searched three electronic databases and consulted experts.

Result(s): Major findings are summarized. Continuous intraoperative nerve monitoring (cIONM) lowered the risk of early postoperative vocal cord palsy 1.8-fold and permanent palsy 29 . 4-fold compared with intermittent intraoperative nerve monitoring. Parathyroid autofluorescence yielded a diagnostic odds ratio (OR) of 228.9 for detection of parathyroid glands over visualization, with 96% sensitivity and 92% specificity. There was no significant difference in the incidence of major complications between the transoral endoscopic thyroidectomy vestibular approach (TOETVA) and transcervical thyroidectomy (1.5% vs. 2.1%, p = 0.75), and a higher body mass index did not lead to a significant increase in the odds of cumulative complication with TOETVA for the overweight (OR = 0.52 [95% confidence interval {CI} 0.17-1.58]) and obese groups (OR = 1.69 [CI 0.74-3.88]). Radiofrequency ablation (RFA) for benign thyroid nodules typically resulted in a 50-85% volume reduction with faster recovery times, less pain levels, and higher social and psychological well-being compared with conventional thyroidectomy at 15 months post-treatment, although physical well-being levels were higher in the conventional thyroidectomy group at this time. RFA for papillary thyroid microcarcinoma showed no significant difference in local tumor progression (1.8% vs. 3.3%, p = 0.209), lymph node metastasis (0.6% vs. 0.6%, p = 1.000), recurrence (1.2% vs. 2.4%, p = 0.244), and 4-year recurrence-free survival rates (98.2% vs. 97.0%, p = 0.223) when compared with transcervical lobectomy.

Conclusion(s): cIONM, parathyroid autofluorescence, transoral vestibular approach thyroid surgery, and RFA for benign and malignant thyroid nodules are some of the latest additions to the surgeon's and interventionalist's armamentarium to manage thyroid disease. These technological advancements demonstrate promise to improve outcomes, decrease complications, and enhance a patient's quality of life, but further rigorous studies are needed to define their utility and value.

© Copyright 2022, Mary Ann Liebert, Inc., publishers 2022.

PMID

34915767 [<https://www.ncbi.nlm.nih.gov/pubmed/?term=34915767>]

Author NameID

Mohamed Ali, Khalid; ORCID: <https://orcid.org/0000-0002-8160-3510>

Institution

(Tufano, Mohamed Ali) Department Of Otolaryngology-Head And Neck Surgery, Johns Hopkins School Of Medicine, Baltimore, MD, United States (Tufano) The Fpg Thyroid And Parathyroid Center, Department Of Otolaryngology-Head And Neck Surgery, Sarasota Memorial Health Care System, Sarasota, FL, United States

Publisher

Mary Ann Liebert Inc.

Emtree Heading

active surveillance; adult; article; autofluorescence; body mass; cancer localization; cancer recurrence; controlled study; diagnostic test accuracy study; endoscopic thyroidectomy; female; human; hypoparathyroidism; lymph node metastasis; male; Medline; obesity; open thyroidectomy; optical coherence tomography; parathyroid gland; physical well-being; postoperative care; predictive value; psychological well-being; radiofrequency ablation; Raman spectrometry; recurrence free survival; recurrent laryngeal nerve; retrospective study; surgical approach; systematic review; thyroid nodule/su [Surgery]; thyroid papillary carcinoma/su [Surgery]; *thyroid surgery; thyroidectomy; tumor growth; vocal cord paralysis; operating room; endoscopic thyroidectomy vestibular approach; transcervical thyroidectomy.

Candidate Terms

endoscopic thyroidectomy vestibular approach [other term] transcervical thyroidectomy [other term]

Device Index Terms

operating room.

Other Index Terms

active surveillance; adult; Article; autofluorescence; body mass; cancer localization; cancer recurrence; controlled study; diagnostic test accuracy study; endoscopic thyroidectomy; female; human; hypoparathyroidism; lymph node metastasis; male; Medline; obesity; open thyroidectomy; optical coherence tomography; parathyroid gland; physical well-being; postoperative care; predictive value; psychological well-being; radiofrequency ablation; Raman spectrometry; recurrence free survival; recurrent laryngeal nerve; retrospective study; surgical approach; systematic review; thyroid nodule / surgery; thyroid papillary carcinoma / surgery; *thyroid surgery; thyroidectomy; tumor growth; vocal cord paralysis.

Link to the Ovid Full Text or citation:

[Click here for full text options](https://ovidsp.ovid.com/ovidweb.cgi?T=JS&CSC=Y&NEWS=N&PAGE=fulltext&D=emed23&AN=637070816)

Link to the External Link Resolver:

[SFX](https://sfx-86scu.hosted.exlibrisgroup.com.cn/86scu?sid=OVID:embase&id=pmid:34915767&id=doi:10.1089%2Fthy.2021.0590&issn=10507256&isbn=&volume=32&issue=1&spage=14&pages=14-18&date=2022&title=Thyroid&atitle=The+Year+in+Surgical+Thyroidology%3A+Recent+Technological+Developments+and+Future+Challenges&aulast=Tufano&pid=<author>Tufano+R.P.%3BMohamed+Ali+K.<%2Fauthor><AN>637070816<%2FAN><DT>Article<%2FDT>)

30.

Simultaneous detection of circulating tumor DNAs using a SERS-based lateral flow assay biosensor for point-of-care diagnostics of head and neck cancer.

Li G., Ge S., Niu P., Zhang J., Mao Y., Wang Y., Sun A.

Biomedical Optics Express. 13(8) (pp 4102-4117), 2022. Date of Publication: 01 Aug 2022.

AN: 2019591869

Circulating tumor DNA (ctDNA) has recently emerged as an ideal target for biomarker analytes. Thus, the development of rapid and ultrasensitive ctDNA detection methods is essential. In this study, a high-throughput surface-enhanced Raman scattering (SERS)-based lateral flow assay (LFA) strip is proposed. The aim of this method is to achieve accurate quantification of TP53 and PIK3CA E545K, two types of ctDNAs associated with head and neck squamous cell carcinoma (HNSCC), particularly for point-of-care testing (POCT). Raman reporters and hairpin DNAs are used to functionalize the Pd-Au core-shell nanorods (Pd-AuNRs), which serve as the SERS probes. During the detection process, the existence of targets could open the hairpins on the surface of Pd-AuNRs and trigger the first step of catalytic hairpin assembly (CHA) amplification. The next stage of CHA amplification is initiated by the hairpins prefixed on the test lines, generating numerous "hot spots" to enhance the SERS signal significantly. By the combination of high-performing SERS probes and a target-specific signal amplification strategy, TP53 and PIK3CA E545K are directly quantified in the range of 100 aM-1 nM, with the respective limits of detection (LOD) calculated as 33.1 aM and 20.0 aM in the PBS buffer and 37.8 aM and 23.1 aM in human serum, which are significantly lower than for traditional colorimetric LFA methods. The entire detection process is completed within 45 min, and the multichannel design realizes the parallel detection of multiple groups of samples. Moreover, the analytical performance is validated, including reproducibility, uniformity, and specificity. Finally, the SERS-LFA biosensor is employed to analyze the expression levels of TP53 and PIK3CA E545K in the serum of patients with HNSCC. The results are verified as consistent with those of qRT-PCR. Thus, the SERS-LFA biosensor can be considered as a noninvasive liquid biopsy assay for clinical cancer diagnosis.

Copyright © 2022 Optica Publishing Group under the terms of the Optica Open Access Publishing Agreement.

Institution

(Li, Ge, Sun) Department of Otorhinolaryngology-Head and Neck Surgery, The Affiliated Hospital of Yangzhou University, Yangzhou University, Yangzhou 225001, China (Ge, Mao) Institute of Translational Medicine, Medical College, Yangzhou University, Yangzhou 225001, China

(Niu) Departments of Otolaryngology, Qingzhou People's Hospital, Qingzhou 262500, China

(Zhang) Department of Anesthesiology, The Affiliated Hospital of Yangzhou University, Yangzhou University, Yangzhou 225001, China

(Wang) Department of Neurosurgery, The Affiliated Hospital of Yangzhou University, Yangzhou University, Yangzhou 225001, China

Publisher

Optica Publishing Group (formerly OSA)

Emtree Heading

adult; article; clinical article; controlled study; female; gene amplification; *head and neck cancer/di [Diagnosis]; head and neck squamous cell carcinoma/di [Diagnosis]; human; human tissue; lateral flow immunochromatography; limit of detection; limit of quantitation; male; mathematical parameters; photon correlation spectroscopy; protein expression; quantitative analysis; Raman spectrometry; sensitivity and specificity; signal noise ratio; surface enhanced Raman spectroscopy; surface plasmon resonance; transmission electron microscopy; carcinoembryonic antigen/ec [Endogenous Compound]; cell penetrating peptide/ec [Endogenous Compound]; *circulating tumor DNA/ec [Endogenous Compound]; *biosensor; spectrometer; transmission electron microscope; S-4800II; UV-3600.

Candidate Terms

S-4800II [device term] UV-3600 [device term]

Device Index Terms

*biosensor; spectrometer; transmission electron microscope.

Drug Index Terms

carcinoembryonic antigen / endogenous compound; cell penetrating peptide / endogenous compound; *circulating tumor DNA / *endogenous compound.

Other Index Terms

adult; Article; clinical article; controlled study; female; gene amplification; *head and neck cancer / *diagnosis; head and neck squamous cell carcinoma / diagnosis; human; human tissue; lateral flow immunochromatography; limit of detection; limit of quantitation; male; mathematical parameters; photon correlation spectroscopy; protein expression; quantitative analysis; Raman spectrometry; sensitivity and specificity; signal noise ratio; surface enhanced Raman spectroscopy; surface plasmon resonance; transmission electron microscopy.

Link to the Ovid Full Text or citation:

[Click here for full text options](https://ovidsp.ovid.com/ovidweb.cgi?T=JS&CSC=Y&NEWS=N&PAGE=fulltext&D=emed23&AN=2019591869)

Link to the External Link Resolver:

[SFX](https://sfx-86scu.hosted.exlibrisgroup.com.cn/86scu?sid=OVID:embase&id=pmid:&id=doi:10.1364%2FBOE.463612&issn=21567085&isbn=&volume=13&issue=8&spage=4102&pages=4102-4117&date=2022&title=Biomedical+Optics+Express&atitle=Simultaneous+detection+of+circulating+tumor+DNAs+using+a+SERS-based+lateral+flow+assay+biosensor+for+point-of-care+diagnostics+of+head+and+neck+cancer&aulast=Li&pid=<author>Li+G.%3BGe+S.%3BNiu+P.%3BZhang+J.%3BMao+Y.%3BWang+Y.%3BSun+A.<%2Fauthor><AN>2019591869<%2FAN><DT>Article<%2FDT>)

31.

Evaluationof Gold Nanoparticles for the Detection of Oral Squamous Cell Carcinoma Using RamanSpectroscopy: In-Vitro Study.

Kamel S.S., Faid A.H., Hamdy O., Eltayeb E.A., Zaky A.A.

NeuroQuantology. 20(10) (pp 2284-2296), 2022. Date of Publication: 2022.

AN: 2017833979

Oral cancer is a common and aggressive cancer with high morbidity, mortality, and recurrence rate globally. Early detection is of utmost importance for cancer prevention and disease management. At present, the application of traditional noninvasive methodsis limited by insufficient sensitivity and specificity. Compared to current imaging contrast agents, nanoparticles are more biocompatible, easier to synthesize, and able to target specific surface molecules.Gold nanoparticles (GNPs) synthesized by using sodium citrate as a reducing agent, were used as surface-enhanced Raman scattering substrates to detect human oral squamous cell carcinoma cell lines. Our resultsreveal that the application of GNPs increased the rate of cancer detection in the normal and cancer cells compared to using Raman only. Moreover,there were no significant differences between the average nanoscale concentration ratio and its effect on the size of the cancerous or the normal cells in the null hypothesis. On the other hand, the alternative hypothesis shows significant differences between the average concentration of nanoparticles and their effect on the size of both the normal and cancerous cells.

Copyright © 2022, Anka Publishers. All rights reserved.

Institution

(Kamel, Eltayeb, Zaky) Cairo University, Department of Medical Application of Laser, National Institute of Laser Enhanced Sciences (NILES), Giza 12613, Egypt (Faid) Cairo University, Department of laser science and interaction, National Institute of Laser Enhanced Sciences (NILES), Giza 12613, Egypt

(Hamdy) Cairo University, Department of Engineering Applications of Lasers, National Institute of Laser Enhanced Sciences (NILES), Giza 12613, Egypt

Publisher

Anka Publishers

Emtree Heading

article; biocompatibility; cancer cell; cancer diagnosis; cancer prevention; cell proliferation; cell survival; cell viability; colorimetry; controlled study; cytotoxicity; cytotoxicity assay; cytotoxicity test; diagnostic test accuracy study; enzyme linked immunosorbent assay; Fourier transform infrared spectroscopy; human; human cell; in vitro study; infrared spectroscopy; morbidity; mouth cancer; *mouth squamous cell carcinoma; OECM-1 cell line; oral squamous cell carcinoma cell line; photon correlation spectroscopy; *Raman spectrometry; recurrence risk; sensitivity and specificity; surface enhanced Raman spectroscopy; surface plasmon resonance; transmission electron microscopy; zeta potential; citrate sodium; *gold nanoparticle; nanomaterial; nanoparticle; centrifuge; confocal microscope; electron microscope; ELISA reader; microplate reader; microscope; microwell plate; particle size analyzer; spectrometer; transmission electron microscope; ultraviolet spectrophotometer; Cary 5000; Neya 16R; Tecnai G20; Zetasizer Nano ZN.

Candidate Terms

Cary 5000 [device term] Neya 16R [device term]

Tecnai G20 [device term]

Zetasizer Nano ZN [device term]

Device Index Terms

centrifuge; confocal microscope; electron microscope; ELISA reader; microplate reader; microscope; microwell plate; particle size analyzer; spectrometer; transmission electron microscope; ultraviolet spectrophotometer.

Drug Index Terms

citrate sodium; *gold nanoparticle; nanomaterial; nanoparticle.

Other Index Terms

Article; biocompatibility; cancer cell; cancer diagnosis; cancer prevention; cell proliferation; cell survival; cell viability; colorimetry; controlled study; cytotoxicity; cytotoxicity assay; cytotoxicity test; diagnostic test accuracy study; enzyme linked immunosorbent assay; Fourier transform infrared spectroscopy; human; human cell; in vitro study; infrared spectroscopy; morbidity; mouth cancer; *mouth squamous cell carcinoma; OECM-1 cell line; oral squamous cell carcinoma cell line; photon correlation spectroscopy; *Raman spectrometry; recurrence risk; sensitivity and specificity; surface enhanced Raman spectroscopy; surface plasmon resonance; transmission electron microscopy; zeta potential.

Link to the Ovid Full Text or citation:

[Click here for full text options](https://ovidsp.ovid.com/ovidweb.cgi?T=JS&CSC=Y&NEWS=N&PAGE=fulltext&D=emed23&AN=2017833979)

Link to the External Link Resolver:

[SFX](https://sfx-86scu.hosted.exlibrisgroup.com.cn/86scu?sid=OVID:embase&id=pmid:&id=doi:10.14704%2Fnq.2022.20.10.NQ55197&issn=13035150&isbn=&volume=20&issue=10&spage=2284&pages=2284-2296&date=2022&title=NeuroQuantology&atitle=Evaluationof+Gold+Nanoparticles+for+the+Detection+of+Oral+Squamous+Cell+Carcinoma+Using+RamanSpectroscopy%3A+In-Vitro+Study&aulast=Kamel&pid=<author>Kamel+S.S.%3BFaid+A.H.%3BHamdy+O.%3BEltayeb+E.A.%3BZaky+A.A.<%2Fauthor><AN>2017833979<%2FAN><DT>Article<%2FDT>)

32.

Diagnostics and Therapeutic Applications of Nanotechnology and Nanomedicine in Oral Squamous Cell Carcinoma*.

Dhar R., Shivji G.G., Devi A.

Journal of Stem Cells. 16(4) (pp 207-221), 2022. Date of Publication: 2022.

AN: 2017769241

Oral squamous cell carcinoma (OSCC) is the most common cancer worldwide. Several factors influence OSCC, tobacco use having a high impact on OSCC development. The prevention of OSCC may be possible by reducing exposure to the risk factors of OSCC. OSCC is the sixth most deadly cancer globally, owing to the drawback of the traditional approach in OSCC treatment and failure of diagnosis at an early stage. The primary stage of detection and a sedentary lifestyle mainly contributes to the morbidity and mortality of OSCC patients. In this scenario, nanotechnology gives a new direction for the treatment and diagnosis of oral cancer. Nanomedicine shows a highly promising result with low toxicity. The toxicity of nanomaterial can be controlled by improving functionalization and systematically minimizing toxicity. As a result, nanomaterial and nanomedicine becomes more biologically compatible. Nanomedicine-based targeted drug delivery to the tumor site releases therapeutic agents most effectively, possibly increasing the efficacy of nanomedicine. This book chapter aims to cover the recent developments in Nanotechnology-based drug delivery systems, advance nanomedicines (Nano-capsules, Gold nanoparticles, Quantum dots, and Carbon nanotubes) and their diagnostics as well as therapeutic applications in OSCC.

Copyright © 2022 Nova Science Publishers, Inc.

Institution

(Dhar, Shivji, Devi) Cancer Biology and Stem Cell Biology Lab, Department of Genetic Engineering, SRM Institute of Science and Technology, Tamil Nadu, India

Publisher

Nova Science Publishers, Inc.

Emtree Heading

adult; *cancer diagnosis; cancer prevention; cancer risk; clinical trial (topic); controlled study; drug delivery system; human; morbidity; mortality; *mouth squamous cell carcinoma; *nanomedicine; *nanotechnology; note; patient safety; Raman spectrometry; risk factor; sedentary lifestyle; *treatment outcome; *carbon nanotube; *gold nanoparticle; hydrogel; lipid nanoparticle; nanocapsule; nanomaterial; polymer nanoparticle; *quantum dot.

Drug Index Terms

*carbon nanotube; *gold nanoparticle; hydrogel; lipid nanoparticle; nanocapsule; nanomaterial; polymer nanoparticle; *quantum dot.

Other Index Terms

adult; *cancer diagnosis; cancer prevention; cancer risk; clinical trial (topic); controlled study; drug delivery system; human; morbidity; mortality; *mouth squamous cell carcinoma; *nanomedicine; *nanotechnology; Note; patient safety; Raman spectrometry; risk factor; sedentary lifestyle; *treatment outcome.

Link to the Ovid Full Text or citation:

[Click here for full text options](https://ovidsp.ovid.com/ovidweb.cgi?T=JS&CSC=Y&NEWS=N&PAGE=fulltext&D=emed23&AN=2017769241)

Link to the External Link Resolver:

[SFX](https://sfx-86scu.hosted.exlibrisgroup.com.cn/86scu?sid=OVID:embase&id=pmid:&id=doi:&issn=15568539&isbn=&volume=16&issue=4&spage=207&pages=207-221&date=2022&title=Journal+of+Stem+Cells&atitle=Diagnostics+and+Therapeutic+Applications+of+Nanotechnology+and+Nanomedicine+in+Oral+Squamous+Cell+Carcinoma*&aulast=Dhar&pid=<author>Dhar+R.%3BShivji+G.G.%3BDevi+A.<%2Fauthor><AN>2017769241<%2FAN><DT>Note<%2FDT>)

33.

Stimulated Raman Histology for Rapid Intra-Operative Diagnosis of Sinonasal and Skull Base Tumors.

Fitzgerald C.W.R., Dogan S., Bou-Nassif R., Mclean T., Woods R., Cracchiolo J.R., Ganly I., Tabar V., Cohen M.A.

Laryngoscope. 132(11) (pp 2142-2147), 2022. Date of Publication: November 2022.

AN: 2017453336

Objective: Intra-operative stimulated Raman histology (SRH) is a novel technology that uses laser spectroscopy and color-matching algorithms to create images similar to the formalin-fixed paraffin-embedded (FFPE) section. We aim to assess the accuracy of SRH in a novel range of sinonasal and skull base tumors.

Method(s): Select patients undergoing sinonasal and skull base surgery using the Invenio ImagingTM NioTM Laser Imaging SRH system between June 2020 and September 2021 were assessed. The SRH images were reviewed for pathologic features similar to frozen section (FS) and FFPE. Time taken for results and diagnostic concordance was assessed.

Result(s): Sixty-seven SRH images from 7 tumor types in 12 patients were assessed. Pathologies included squamous cell carcinoma, rhabdomyosarcoma, inverted papilloma, adenoid cystic carcinoma, SMARCB1-deficient sinonasal carcinoma, mucosal melanoma, metastatic colonic adenocarcinoma, and meningioma. Tumor was identified in 100% of lesional specimens, with characteristic diagnostic features readily appreciable on SRH. Median time for diagnosis was significantly faster for SRH (4.3 min) versus FS (44.5 min; p = <.0001). Where SRH sample site matched precisely to FS (n = 32/67, 47.8%), the same diagnosis was confirmed in 93.8%. Sensitivity, specificity, precision, and overall accuracy of SRH were 93.3%, 94.1%, 93.8%, and 93.3%, respectively. Near-perfect concordance was seen between SRH and FS (Cohen's kappa [kappa] = 0.89).

Conclusion(s): Stimulated Raman histology can rapidly produce images similar to FFPE H&E in sinonasal and skull base tumors. This technology has the potential to act as an adjunct or alternative to standard FS.

Level of Evidence: 4 Laryngoscope, 132:2142-2147, 2022.

Copyright © 2022 The American Laryngological, Rhinological and Otological Society, Inc.

PMID

35634892 [<https://www.ncbi.nlm.nih.gov/pubmed/?term=35634892>]

Author NameID

Fitzgerald, Conall W.R.; ORCID: <https://orcid.org/0000-0003-4700-7261> Ganly, Ian; ORCID: <https://orcid.org/0000-0001-7636-5426>

Institution

(Fitzgerald, Mclean, Woods, Cracchiolo, Ganly, Cohen) Head and Neck Service, Department of Surgery, Memorial Sloan Kettering Cancer Center, New York, NY, United States (Dogan) Department of Pathology, Memorial Sloan Kettering Cancer Center, New York, NY, United States

(Bou-Nassif, Tabar) Department of Neurosurgery, Memorial Sloan Kettering Cancer Center, New York, NY, United States

Publisher

John Wiley and Sons Inc

Emtree Heading

accuracy; adenoid cystic carcinoma/di [Diagnosis]; adult; aged; algorithm; article; clinical article; controlled study; diagnosis time; diagnostic test accuracy study; *early diagnosis; ethmoid sinus; female; frontal sinus; frozen section; histopathology; human; human tissue; *intraoperative period; inverted papilloma/di [Diagnosis]; laser spectroscopy; male; maxillary sinus; meningioma/di [Diagnosis]; metastatic colon cancer; mucosal melanoma/di [Diagnosis]; nose cavity; nose surgery; *nose tumor; protein content; pterygopalatine fossa; *Raman spectrometry; rhabdomyosarcoma/di [Diagnosis]; sensitivity and specificity; *skull base tumor; skull surgery; sphenoid sinus; squamous cell carcinoma; tumor diagnosis; formaldehyde; lipid; SWI/SNF related matrix associated actin dependent regulator of chromatin subfamily B member 1; imaging system; Invenio Imaging; nio.

Candidate Terms

Invenio Imaging [device term] Nio [device term]

Device Index Terms

imaging system.

Drug Index Terms

formaldehyde; lipid; SWI/SNF related matrix associated actin dependent regulator of chromatin subfamily B member 1.

Other Index Terms

accuracy; adenoid cystic carcinoma / diagnosis; adult; aged; algorithm; Article; clinical article; controlled study; diagnosis time; diagnostic test accuracy study; *early diagnosis; ethmoid sinus; female; frontal sinus; frozen section; histopathology; human; human tissue; *intraoperative period; inverted papilloma / diagnosis; laser spectroscopy; male; maxillary sinus; meningioma / diagnosis; metastatic colon cancer; mucosal melanoma / diagnosis; nose cavity; nose surgery; *nose tumor; protein content; pterygopalatine fossa; *Raman spectrometry; rhabdomyosarcoma / diagnosis; sensitivity and specificity; *skull base tumor; skull surgery; sphenoid sinus; squamous cell carcinoma; tumor diagnosis.

Link to the Ovid Full Text or citation:

[Click here for full text options](https://ovidsp.ovid.com/ovidweb.cgi?T=JS&CSC=Y&NEWS=N&PAGE=fulltext&D=emed23&AN=2017453336)

Link to the External Link Resolver:

[SFX](https://sfx-86scu.hosted.exlibrisgroup.com.cn/86scu?sid=OVID:embase&id=pmid:35634892&id=doi:10.1002%2Flary.30233&issn=0023852X&isbn=&volume=132&issue=11&spage=2142&pages=2142-2147&date=2022&title=Laryngoscope&atitle=Stimulated+Raman+Histology+for+Rapid+Intra-Operative+Diagnosis+of+Sinonasal+and+Skull+Base+Tumors&aulast=Fitzgerald&pid=<author>Fitzgerald+C.W.R.%3BDogan+S.%3BBou-Nassif+R.%3BMclean+T.%3BWoods+R.%3BCracchiolo+J.R.%3BGanly+I.%3BTabar+V.%3BCohen+M.A.<%2Fauthor><AN>2017453336<%2FAN><DT>Article<%2FDT>)

34.

Histologically resolved multiomics enables precise molecular profiling of human intratumor heterogeneity.

Chen T., Cao C., Zhang J., Streets A., Li T., Huang Y.

PLoS Biology. 20(7) (no pagination), 2022. Article Number: e3001699. Date of Publication: July 2022.

AN: 2019399645

ABUoth: tPhleeacsoemcopnofsiritmiotnhaotfacllehlel taydpiensglaevnedlsthareeirresppraetsiaelndteisdtcriobrurteiocntlyin: a tissue play a critical role in cellular function, organ development, and disease progression. For example, intratumor heterogeneity and the distribution of transcriptional and genetic events in single cells drive the genesis and development of cancer. However, it can be challenging to fully characterize the molecular profile of cells in a tissue with high spatial resolution because microscopy has limited ability to extract comprehensive genomic information, and the spatial resolution of genomic techniques tends to be limited by dissection. There is a growing need for tools that can be used to explore the relationship between histological features, gene expression patterns, and spatially correlated genomic alterations in healthy and diseased tissue samples. Here, we present a technique that combines label-free histology with spatially resolved multiomics in unfixed and unstained tissue sections. This approach leverages stimulated Raman scattering microscopy to provide chemical contrast that reveals histological tissue architecture, allowing for high-resolution in situ laser microdissection of regions of interests. These microtissue samples are then processed for DNA and RNA sequencing to identify unique genetic profiles that correspond to distinct anatomical regions. We demonstrate the capabilities of this technique by mapping gene expression and copy number alterations to histologically defined regions in human oral squamous cell carcinoma (OSCC). Our approach provides complementary insights in tumorigenesis and offers an integrative tool for macroscale cancer tissues with spatial multiomics assessments.

Copyright © 2022 Chen et al. This is an open access article distributed under the terms of the Creative Commons Attribution License, which permits unrestricted use, distribution, and reproduction in any medium, provided the original author and source are credited.

PMID

35776767 [<https://www.ncbi.nlm.nih.gov/pubmed/?term=35776767>]

Institution

(Chen, Cao, Streets, Huang) Biomedical Pioneering Innovation Center (BIOPIC), School of Life Sciences, Peking University, Beijing, China (Chen, Huang) College of Engineering, Peking University, Beijing, China

(Zhang, Li) Department of Oral Pathology, Peking University, School and Hospital of Stomatology, National Center of Stomatology, National Clinical Research Center for Oral Diseases, National Engineering Research Center of Oral Biomaterials and Digital Medical Devices, Beijing, China

(Zhang, Li) Beijing Key Laboratory of Digital Stomatology, Chinese Academy of Medical Sciences (2019RU034), Beijing, China

(Li) Research Unit of Precision Pathologic Diagnosis in Tumors of the Oral and Maxillofacial Regions, Chinese Academy of Medical Sciences (2019RU034), Beijing, China

(Huang) Peking-Tsinghua Center for Life Sciences, Peking University, Beijing, China

(Huang) Beijing Advanced Innovation Center for Genomics (ICG), Peking University, Beijing, China

(Huang) College of Chemistry and Molecular Engineering, Peking University, Beijing, China

(Huang) Institute for Cell Analysis, Shenzhen Bay Laboratory, Guangdong, China

Publisher

Public Library of Science

Emtree Heading

accuracy; article; cancer survival; cancer tissue; case report; clinical article; controlled study; DNA sequencing; female; gene amplification; gene dosage; gene expression; genetic profile; human; human tissue; laser microdissection; male; microscopy; *molecular fingerprinting; mouth squamous cell carcinoma; *multiomics; overall survival; RNA sequencing; survival time; tissue section; transcriptomics.

Other Index Terms

accuracy; Article; cancer survival; cancer tissue; case report; clinical article; controlled study; DNA sequencing; female; gene amplification; gene dosage; gene expression; genetic profile; human; human tissue; laser microdissection; male; microscopy; *molecular fingerprinting; mouth squamous cell carcinoma; *multiomics; overall survival; RNA sequencing; survival time; tissue section; transcriptomics.

Link to the Ovid Full Text or citation:

[Click here for full text options](https://ovidsp.ovid.com/ovidweb.cgi?T=JS&CSC=Y&NEWS=N&PAGE=fulltext&D=emed23&AN=2019399645)

Link to the External Link Resolver:

[SFX](https://sfx-86scu.hosted.exlibrisgroup.com.cn/86scu?sid=OVID:embase&id=pmid:35776767&id=doi:10.1371%2Fjournal.pbio.3001699&issn=15449173&isbn=&volume=20&issue=7&spage=e3001699&pages=&date=2022&title=PLoS+Biology&atitle=Histologically+resolved+multiomics+enables+precise+molecular+profiling+of+human+intratumor+heterogeneity&aulast=Chen&pid=<author>Chen+T.%3BCao+C.%3BZhang+J.%3BStreets+A.%3BLi+T.%3BHuang+Y.<%2Fauthor><AN>2019399645<%2FAN><DT>Article<%2FDT>)

35.

One-step synthesis of core-shell CoP@ N, P co-doped porous carbon sheet + CNTs: Boosting high-rate/long-life lithium storage via triple-carbon synergistic effects.

Lan B., Zhang X., Lu J., Wei C., Wang Y., Wen G.

Colloids and Surfaces A: Physicochemical and Engineering Aspects. 651 (no pagination), 2022. Article Number: 129648. Date of Publication: 20 Oct 2022.

AN: 2019236065

A reasonable structural design is essential to suppress the volume expansion of transition metal phosphides and to enhance their electrochemical performance as anode materials for lithium-ion batteries. Herein, a three-dimensional architecture was formed by the carbon nanotubes (CNTs) connected with nitrogen, phosphorus co-doped porous carbon sheets (NPC), in which core-shell-like carbon-coated CoP nanoparticles were uniformly embedded, synthesized CoP@NPC+CNTs composites with a triple-carbon synergistic cross-linked network structure by a one-step self-templating method. The novel spatial structure effectively suppresses the volume change of CoP, ensures structural stability, and provides a multidimensional pathway for fast ion/electron transport. In addition, the N, P co-doping can synergistically promote the material conductivity and provides plenty of active sites. Profiting from the unique structure, the CoP@NPC+CNTs anode displays excellent lithium storage performance (1074.5 mAh g-1 at 0.1 A g-1 after 280 cycles), superior rate capacities and long cycle stability (701.7 mAh g-1 at 1.0 A g-1 after 1000 cycles). The simple synthesis method and special structure also provide new ideas for preparing other transition metal phosphides.

Copyright © 2022 Elsevier B.V.

Institution

(Lan, Zhang, Lu, Wei, Wang, Wen) School of Materials Science and Engineering, Shandong University of Technology, Zibo 255000, China (Zhang) Shandong Guiyuan Advanced Ceramic Corporation Law, Zibo 255086, China

(Wang) School of Materials Science and Engineering, Harbin Institute of Technology, Harbin 150001, China

Publisher

Elsevier B.V.

Emtree Heading

adsorption; article; carbonization; coating thickness; conductance; cross linking; crystal structure; current density; decomposition; desorption; diffusion; electric conductivity; electrochemical analysis; electron diffraction; hydrogen bond; ion transport; isotherm; lithiation; micromorphology; molecular stability; particle size; phosphorylation; physical phase; pore size distribution; porosity; precursor; pyrolysis; Raman spectrometry; scanning electron microscopy; *storage; surface area; surface property; *synergistic effect; *synthesis; thermogravimetry; volume; *carbon nanotube; *cobalt derivative; *lithium; *phosphorus derivative; anode electrode; electric battery.

Device Index Terms

anode electrode; electric battery.

Drug Index Terms

*carbon nanotube; *cobalt derivative; *lithium; *phosphorus derivative.

Other Index Terms

adsorption; Article; carbonization; coating thickness; conductance; cross linking; crystal structure; current density; decomposition; desorption; diffusion; electric conductivity; electrochemical analysis; electron diffraction; hydrogen bond; ion transport; isotherm; lithiation; micromorphology; molecular stability; particle size; phosphorylation; physical phase; pore size distribution; porosity; precursor; pyrolysis; Raman spectrometry; scanning electron microscopy; *storage; surface area; surface property; *synergistic effect; *synthesis; thermogravimetry; volume.

Link to the Ovid Full Text or citation:

[Click here for full text options](https://ovidsp.ovid.com/ovidweb.cgi?T=JS&CSC=Y&NEWS=N&PAGE=fulltext&D=emed23&AN=2019236065)

Link to the External Link Resolver:

[SFX](https://sfx-86scu.hosted.exlibrisgroup.com.cn/86scu?sid=OVID:embase&id=pmid:&id=doi:10.1016%2Fj.colsurfa.2022.129648&issn=09277757&isbn=&volume=651&issue=&spage=129648&pages=&date=2022&title=Colloids+and+Surfaces+A%3A+Physicochemical+and+Engineering+Aspects&atitle=One-step+synthesis+of+core-shell+CoP@+N%2C+P+co-doped+porous+carbon+sheet+%2B+CNTs%3A+Boosting+high-rate%2Flong-life+lithium+storage+via+triple-carbon+synergistic+effects&aulast=Lan&pid=<author>Lan+B.%3BZhang+X.%3BLu+J.%3BWei+C.%3BWang+Y.%3BWen+G.<%2Fauthor><AN>2019236065<%2FAN><DT>Article<%2FDT>)

36.

Catheter like U-shaped fiber as a probe for oral cancer.

Biswas R.

Biosensors and Bioelectronics: X. 11 (no pagination), 2022. Article Number: 100181. Date of Publication: September 2022.

AN: 2019010232

This short communication reports a unique proposition of a versatile sensing scheme-aimed at early detection of oral cancer. Based on intensity modulation, the probe can render both qualitative as well as quantitative assessments via saliva samples. It can further plausibly affirm the stage of oral cancer in the patient. With remarkable response time and superior specificity due to incorporation of biomarkers, this catheter like probe allows user to get rid of sample storage problem and other allied complications.

Copyright © 2022 The Author(s)

Author NameID

Biswas, Rajib; ORCID: <https://orcid.org/0000-0001-6246-2196>

Institution

(Biswas) Applied Optics and Photonics Lab, Department of Physics, Tezpur University, Tezpur 784028, India

Publisher

Elsevier Ltd

Emtree Heading

article; autofluorescence imaging; *cancer diagnosis; cancer staging; diffuse reflectance spectroscopy; early cancer diagnosis; fluorescence microscopy; human; *mouth cancer/di [Diagnosis]; optical coherence tomography; optical sensor; Raman spectrometry; reaction time; real time reverse transcription polymerase chain reaction; saliva analysis; biological marker/ec [Endogenous Compound]; *fiber optic biosensor.

Device Index Terms

*fiber optic biosensor.

Drug Index Terms

biological marker / endogenous compound.

Other Index Terms

Article; autofluorescence imaging; *cancer diagnosis; cancer staging; diffuse reflectance spectroscopy; early cancer diagnosis; fluorescence microscopy; human; *mouth cancer / *diagnosis; optical coherence tomography; optical sensor; Raman spectrometry; reaction time; real time reverse transcription polymerase chain reaction; saliva analysis.

Link to the Ovid Full Text or citation:

[Click here for full text options](https://ovidsp.ovid.com/ovidweb.cgi?T=JS&CSC=Y&NEWS=N&PAGE=fulltext&D=emed23&AN=2019010232)

Link to the External Link Resolver:

[SFX](https://sfx-86scu.hosted.exlibrisgroup.com.cn/86scu?sid=OVID:embase&id=pmid:&id=doi:10.1016%2Fj.biosx.2022.100181&issn=25901370&isbn=&volume=11&issue=&spage=100181&pages=&date=2022&title=Biosensors+and+Bioelectronics%3A+X&atitle=Catheter+like+U-shaped+fiber+as+a+probe+for+oral+cancer&aulast=Biswas&pid=<author>Biswas+R.<%2Fauthor><AN>2019010232<%2FAN><DT>Article<%2FDT>)

37.

Development of a SERS based cancer diagnosis approach employing cryosectioned thyroid tissue samples on PDMS.

Mert S., Sancak S., Aydin H., Fersahoglu A.T., Somay A., Ozkan F., Culha M.

Nanomedicine: Nanotechnology, Biology, and Medicine. 44 (no pagination), 2022. Article Number: 102577. Date of Publication: August 2022.

AN: 2018897696

An efficient SERS based novel analytical approach named Cryosectioned-PDMS was developed systematically and evaluated applying on 64 thyroid biopsy samples. To utilize thyroid biopsy samples, a 20-mul volume of h-AgNPs suspension was dropped on a 5-mum thick cryosectioned biopsy specimen placed on the PDMS coated glass slide. The SERS spectra from a 10 x 10 points array acquired by mapping 22.5 mum x 22.5 mum sized area from suspended dried droplets placed on the tissue surface. The probability of correctly predicted performance for diagnosis of malignant, benign and healthy tissues was resulted in the accuracy of 100 % for the spectral bands at 667, 724, 920, 960, 1052, 1096, 1315 and 1457 cm-1 using PCA-fed LDA machine learning. The Cryosectioned-PDMS biophotonic approach with PCA-LDA predictive model demonstrated that the vibrational signatures can accurately recognize the fingerprint of cancer pathology from a healthy one with a simple and fast sample preparation methodology.

Copyright © 2022 Elsevier Inc.

PMID

35716872 [<https://www.ncbi.nlm.nih.gov/pubmed/?term=35716872>]

Institution

(Mert) Department of Genetics and Bioengineering, Faculty of Engineering, Yeditepe University, Istanbul 34755, Turkey (Mert) Department of Genetics and Bioengineering, Faculty of Engineering, Istanbul Okan University, Istanbul 34959, Turkey

(Sancak) Department of Internal Medicine, Endocrinology and Metabolism Disorders, Fatih Sultan Mehmet Education and Research Hospital, University of Health Sciences, Istanbul 34752, Turkey

(Aydin) Department of Internal Medicine, Section of Endocrinology and Metabolism, Yeditepe University Hospital, Istanbul 34752, Turkey

(Fersahoglu) General Surgery Clinic, Fatih Sultan Mehmet Education and Research Hospital, University of Health Sciences, Istanbul 34752, Turkey

(Somay) Department of Pathology, Fatih Sultan Mehmet Education and Research Hospital, University of Health Sciences, Istanbul 34752, Turkey

(Ozkan) Department of Pathology, Yeditepe University Hospital, Istanbul 34752, Turkey

(Culha) The Knight Cancer Institute, Cancer Early Detection Advanced Research Center (CEDAR), Oregon Health and Science University, Portland, OR 97239, United States

(Culha) Sabanci University Nanotechnology Research and Application Center (SUNUM), Istanbul, Tuzla 34956, Turkey

(Culha) Department of Chemistry & Physics, Augusta University, Augusta, GA 30912, United States

Publisher

Elsevier Inc.

Emtree Heading

article; *cancer diagnosis; classification algorithm; colloid; controlled study; diagnostic accuracy; discriminant analysis; freeze thawing; frozen section; human; human tissue; leave one out cross validation; machine learning; measurement; predictive model; principal component analysis; reproducibility; sensitivity and specificity; *surface enhanced Raman spectroscopy; *thyroid cancer/di [Diagnosis]; *thyroid gland tissue; *thyroid tumor/di [Diagnosis]; *tumor biopsy; ultraviolet visible spectroscopy; *dimeticone; glass; silastic; silver nanoparticle; silver nitrate; unclassified drug; cryostat; hydroxylamine hydrochloride.

Candidate Terms

hydroxylamine hydrochloride [drug term]

Device Index Terms

cryostat.

Drug Index Terms

*dimeticone; glass; silastic; silver nanoparticle; silver nitrate; unclassified drug.

Other Index Terms

Article; *cancer diagnosis; classification algorithm; colloid; controlled study; diagnostic accuracy; discriminant analysis; freeze thawing; frozen section; human; human tissue; leave one out cross validation; machine learning; measurement; predictive model; principal component analysis; reproducibility; sensitivity and specificity; *surface enhanced Raman spectroscopy; *thyroid cancer / *diagnosis; *thyroid gland tissue; *thyroid tumor / *diagnosis; *tumor biopsy; ultraviolet visible spectroscopy.

Link to the Ovid Full Text or citation:

[Click here for full text options](https://ovidsp.ovid.com/ovidweb.cgi?T=JS&CSC=Y&NEWS=N&PAGE=fulltext&D=emed23&AN=2018897696)

Link to the External Link Resolver:

[SFX](https://sfx-86scu.hosted.exlibrisgroup.com.cn/86scu?sid=OVID:embase&id=pmid:35716872&id=doi:10.1016%2Fj.nano.2022.102577&issn=15499634&isbn=&volume=44&issue=&spage=102577&pages=&date=2022&title=Nanomedicine%3A+Nanotechnology%2C+Biology%2C+and+Medicine&atitle=Development+of+a+SERS+based+cancer+diagnosis+approach+employing+cryosectioned+thyroid+tissue+samples+on+PDMS&aulast=Mert&pid=<author>Mert+S.%3BSancak+S.%3BAydin+H.%3BFersahoglu+A.T.%3BSomay+A.%3BOzkan+F.%3BCulha+M.<%2Fauthor><AN>2018897696<%2FAN><DT>Article<%2FDT>)

38.

Aptamers used for molecular imaging and theranostics - recent developments.

Bohrmann L., Burghardt T., Haynes C., Saatchi K., Hafeli U.O.

Theranostics. 12(9) (pp 4010-4050), 2022. Date of Publication: 2022.

AN: 2018739201

Aptamers are single stranded oligonucleotides that fold into three dimensional structures and are able to recognize a variety of molecular targets. Due to the similarity to antibodies with regards to specificity and affinity and their chemical versatility, aptamers are increasingly used to create targeted probes for in vivo molecular imaging and therapy. Hence, aptamer-based probes have been utilized in practically all major imaging modalities such as nuclear imaging, magnetic resonance imaging, x-ray computed tomography, echography and fluorescence imaging, as well as newer modalities such as surface enhanced Raman spectroscopy. Aside from targeting, aptamers have been used for the creation of sensors that allow the localized detection of cellular markers such as ATP in vivo. This review focuses on in vivo studies of aptamer-based probes for imaging and theranostics since the comprehensive overview by Bouvier-Muller and Duconge in 2018.

Copyright © The author(s)

PMID

35673581 [<https://www.ncbi.nlm.nih.gov/pubmed/?term=35673581>]

Institution

(Bohrmann, Burghardt, Saatchi, Hafeli) Faculty of Pharmaceutical Sciences, University of British Columbia, Vancouver, BC, Canada (Bohrmann, Hafeli) Department of Pharmacy, Faculty of Health and Medical Sciences, University of Copenhagen, Copenhagen, Denmark

(Haynes) Michael Smith Laboratories, University of British Columbia, Vancouver, BC, Canada

Publisher

Ivyspring International Publisher

Emtree Heading

drug delivery system; echography; fluorescence imaging; human; in vivo study; liver cell carcinoma; *molecular imaging; nonhuman; nuclear magnetic resonance imaging; PEGylation; positron emission tomography; review; single photon emission computed tomography; surface enhanced Raman spectroscopy; *theranostic nanomedicine; thyroid papillary carcinoma; tumor microenvironment; x-ray computed tomography; adenosine triphosphate/ec [Endogenous Compound]; antibody drug conjugate; *aptamer; nanomaterial.

Drug Index Terms

adenosine triphosphate / endogenous compound; antibody drug conjugate; *aptamer; nanomaterial.

Other Index Terms

drug delivery system; echography; fluorescence imaging; human; in vivo study; liver cell carcinoma; *molecular imaging; nonhuman; nuclear magnetic resonance imaging; PEGylation; positron emission tomography; Review; single photon emission computed tomography; surface enhanced Raman spectroscopy; *theranostic nanomedicine; thyroid papillary carcinoma; tumor microenvironment; x-ray computed tomography.

Link to the Ovid Full Text or citation:

[Click here for full text options](https://ovidsp.ovid.com/ovidweb.cgi?T=JS&CSC=Y&NEWS=N&PAGE=fulltext&D=emed23&AN=2018739201)

Link to the External Link Resolver:

[SFX](https://sfx-86scu.hosted.exlibrisgroup.com.cn/86scu?sid=OVID:embase&id=pmid:35673581&id=doi:10.7150%2FTHNO.72949&issn=18387640&isbn=&volume=12&issue=9&spage=4010&pages=4010-4050&date=2022&title=Theranostics&atitle=Aptamers+used+for+molecular+imaging+and+theranostics+-+recent+developments&aulast=Bohrmann&pid=<author>Bohrmann+L.%3BBurghardt+T.%3BHaynes+C.%3BSaatchi+K.%3BHafeli+U.O.<%2Fauthor><AN>2018739201<%2FAN><DT>Review<%2FDT>)

39.

Encapsulation and controlled release of fragrances from MIL-101(Fe)-based recyclable magnetic nanoporous carbon.

Wu C.-J., Liu Y.-F., Zhang W.-F., Zhang C., Chai G.-B., Zhang Q.-D., Mao J., Ahmad I., Zhang S.-S., Xie J.-P.

Colloids and Surfaces A: Physicochemical and Engineering Aspects. 640 (no pagination), 2022. Article Number: 128453. Date of Publication: 05 May 2022.

AN: 2016765006

In this work, MIL-101(Fe), a biocompatible metal-organic framework (MOFs), was calcinated to obtain high-performance nanoporous carbon (Fe-MNPC). The carbonized product was selected as a promising candidate adsorbent for the controlled release of fragrances. Isobutyraldehyde (BA), ethyl acetate (EA), benzaldehyde (BAD), and methoxybenzene (MB) of high saturated vapor pressures were selected as the representative fragrances for inclusion and controlled release studies. The prepared Fe-MNPC featured a large specific surface area (SSA) of 121.46 m2 g-1, which provided feasible storage and controlled-release ability. The high stability and magnetic property of Fe-MNPC guaranteed fast collection and efficient recyclability. The effective loading amounts of BA are 0.22 and EA are 0.16 g g-1, respectively, while that of BAD and MB can reach 0.56 and 0.63 g g-1, respectively. Fe-MNPC exhibited a much longer release effect over BA and EA than BAD and MB, suggesting an excellent adsorption-release selectivity of Fe-MNPC to different fragrances. This study sets an example for the usability of MOF-derived nanoporous carbon (NPC) in fragrance release and enriches the application of NPC in volatile release.

Copyright © 2022 Elsevier B.V.

Institution

(Wu, Liu, Zhang) College of Chemistry, Zhengzhou University, Kexue Avenue 100, Zhengzhou, Henan 450001, China (Chai, Zhang, Mao, Xie) Zhengzhou Tobacco Research Institute of CNTC, Fengyang Road, Zhengzhou, Henan 450001, China

(Chai, Zhang, Mao, Xie) Henan University of Chinese Medicine, Zhengzhou 450008, China

(Wu, Chai, Zhang, Mao, Xie) Research Center of Flavor Science, Zhengzhou University, Kexue Avenue 100, Zhengzhou, Henan 450001, China

(Zhang, Ahmad, Zhang) Center of Advanced Analysis and Gene Sequencing, Key Laboratory of Molecular Sensing and Harmful Substances Detection Technology, Zhengzhou University, Kexue Avenue 100, Zhengzhou, Henan 450001, China

(Zhang, Ahmad, Zhang) Green Catalysis Center and College of Chemistry, Zhengzhou University, Zhengzhou 450001, China

Publisher

Elsevier B.V.

Emtree Heading

adsorption; article; biocompatibility; chemical composition; community structure; controlled study; crystal structure; drug delivery system; electrochemical analysis; elemental analysis; emulsion; *encapsulation; energy dispersive X ray spectroscopy; fungal gene; high performance liquid chromatography; human; hydrogen bond; infrared spectroscopy; isotherm; methanogenesis; particle size; photon correlation spectroscopy; pyrolysis; Raman spectrometry; scanning electron microscopy; scientific literature; solid phase microextraction; surface area; surface property; sustained release preparation; thermogravimetry; transmission electron microscopy; usability; vapor pressure; volatilization; acetic acid ethyl ester; adsorbent; anisole; benzaldehyde; *carbon; fragrance; iron; iron oxide; isobutyraldehyde; *magnetic nanoparticle; metabotropic receptor; metal organic framework; n,n dimethylformamide; nanocomposite; nanoparticle.

Drug Index Terms

acetic acid ethyl ester; adsorbent; anisole; benzaldehyde; *carbon; fragrance; iron; iron oxide; isobutyraldehyde; *magnetic nanoparticle; metabotropic receptor; metal organic framework; n,n dimethylformamide; nanocomposite; nanoparticle.

Other Index Terms

adsorption; Article; biocompatibility; chemical composition; community structure; controlled study; crystal structure; drug delivery system; electrochemical analysis; elemental analysis; emulsion; *encapsulation; energy dispersive X ray spectroscopy; fungal gene; high performance liquid chromatography; human; hydrogen bond; infrared spectroscopy; isotherm; methanogenesis; particle size; photon correlation spectroscopy; pyrolysis; Raman spectrometry; scanning electron microscopy; scientific literature; solid phase microextraction; surface area; surface property; sustained release preparation; thermogravimetry; transmission electron microscopy; usability; vapor pressure; volatilization.

Link to the Ovid Full Text or citation:

[Click here for full text options](https://ovidsp.ovid.com/ovidweb.cgi?T=JS&CSC=Y&NEWS=N&PAGE=fulltext&D=emed23&AN=2016765006)

Link to the External Link Resolver:

[SFX](https://sfx-86scu.hosted.exlibrisgroup.com.cn/86scu?sid=OVID:embase&id=pmid:&id=doi:10.1016%2Fj.colsurfa.2022.128453&issn=09277757&isbn=&volume=640&issue=&spage=128453&pages=&date=2022&title=Colloids+and+Surfaces+A%3A+Physicochemical+and+Engineering+Aspects&atitle=Encapsulation+and+controlled+release+of+fragrances+from+MIL-101(Fe)-based+recyclable+magnetic+nanoporous+carbon&aulast=Wu&pid=<author>Wu+C.-J.%3BLiu+Y.-F.%3BZhang+W.-F.%3BZhang+C.%3BChai+G.-B.%3BZhang+Q.-D.%3BMao+J.%3BAhmad+I.%3BZhang+S.-S.%3BXie+J.-P.<%2Fauthor><AN>2016765006<%2FAN><DT>Article<%2FDT>)

40.

Phase separation of FG-nucleoporins in nuclear pore complexes.

Nag N., Sasidharan S., Uversky V.N., Saudagar P., Tripathi T.

Biochimica et Biophysica Acta - Molecular Cell Research. 1869(4) (no pagination), 2022. Article Number: 119205. Date of Publication: April 2022.

AN: 2016359870

The nuclear envelope (NE) is a bilayer membrane that separates and physically isolates the genetic material from the cytoplasm. Nuclear pore complexes (NPCs) are cylindrical structures embedded in the NE and remain the sole channel of communication between the nucleus and the cytoplasm. The interior of NPCs contains densely packed intrinsically disordered FG-nucleoporins (FG-Nups), consequently forming a permeability barrier. This barrier facilitates the selection and specificity of the cargoes that are imported, exported, or shuttled through the NPCs. Recent studies have revealed that FG-Nups undergo the process of liquid-liquid phase separation into liquid droplets. Moreover, these liquid droplets mimic the permeability barrier observed in the interior of NPCs. This review highlights the phase separation of FG-Nups occurring inside the NPCs rooted in the NE. We discuss the phase separation of FG-Nups and compare the different aspects contributing to their phase separation. Furthermore, several diseases caused by the aberrant phase separation of the proteins are examined with respect to NEs. By understanding the fundamental process of phase separation at the nuclear membrane, the review seeks to explore the parameters influencing this phenomenon as well as its importance, ultimately paving the way for better research on the structure-function relationship of biomolecular condensates.

Copyright © 2022 Elsevier B.V.

PMID

34995711 [<https://www.ncbi.nlm.nih.gov/pubmed/?term=34995711>]

Institution

(Nag, Tripathi) Molecular and Structural Biophysics Laboratory, Department of Biochemistry, North-Eastern Hill University, Shillong 793022, India (Sasidharan, Saudagar) Department of Biotechnology, National Institute of Technology Warangal, Warangal 506004, India

(Uversky) Department of Molecular Medicine and Byrd Alzheimer's Research Institute, Morsani College of Medicine, University of South Florida, Tampa, FL 33620, United States

(Uversky) Center for Molecular Mechanisms of Aging and Age-Related Diseases, Moscow Institute of Physics and Technology, Institutskiy pereulok, 9, Dolgoprudny, Moscow Region 141700, Russian Federation

Publisher

Elsevier B.V.

Emtree Heading

acute myeloid leukemia; Alzheimer disease; amyotrophic lateral sclerosis; analytic method; article; artificial neural network; atomic force microscopy; carcinogenesis; cell nucleus membrane; chemical phenomena; chronic myeloid leukemia; circular dichroism; deep neural network; differential scanning calorimetry; Drosophila melanogaster; electron microscopy; electron spin resonance; fluorescence correlation spectroscopy; fluorescence microscopy; fluorescence recovery after photobleaching; fluorescence resonance energy transfer; frontotemporal dementia; gene mutation; gene sequence; human; Huntington chorea; infrared spectroscopy; mitosis; molecular dynamics; molecular weight; Monte Carlo method; neutron scattering; nonhuman; nuclear export signal; nuclear localization signal; nuclear magnetic resonance spectroscopy; *nuclear pore complex; nucleocytoplasmic transport; Parkinson disease; *phase separation; prion disease; protein structure; radiation scattering; Raman spectrometry; signal transduction; static electricity; stomach carcinoma; support vector machine; thyroid papillary carcinoma; ultracentrifugation; Xenopus laevis; alpha synuclein/ec [Endogenous Compound]; cyclic GMP dependent protein kinase/ec [Endogenous Compound]; heterogeneous nuclear ribonucleoprotein A1/ec [Endogenous Compound]; hydrogel; membrane protein/ec [Endogenous Compound]; *nucleoporin/ec [Endogenous Compound]; RNA binding protein FUS/ec [Endogenous Compound]; T lymphocyte receptor/ec [Endogenous Compound]; TAR DNA binding protein/ec [Endogenous Compound]; tau protein/ec [Endogenous Compound]; thioflavine; unclassified drug; liquid liquid phase separation; static light scattering; cGAS protein/ec [Endogenous Compound]; *fg nucleoporin/ec [Endogenous Compound]; ntrk1 protein/ec [Endogenous Compound].

Candidate Terms

liquid liquid phase separation [other term] static light scattering [other term]

cGAS protein / endogenous compound [drug term]

*fg nucleoporin / *endogenous compound [drug term]

NTrk1 protein / endogenous compound [drug term]

Drug Index Terms

alpha synuclein / endogenous compound; cyclic GMP dependent protein kinase / endogenous compound; heterogeneous nuclear ribonucleoprotein A1 / endogenous compound; hydrogel; membrane protein / endogenous compound; *nucleoporin / *endogenous compound; RNA binding protein FUS / endogenous compound; T lymphocyte receptor / endogenous compound; TAR DNA binding protein / endogenous compound; tau protein / endogenous compound; thioflavine; unclassified drug.

Other Index Terms

acute myeloid leukemia; Alzheimer disease; amyotrophic lateral sclerosis; analytic method; Article; artificial neural network; atomic force microscopy; carcinogenesis; cell nucleus membrane; chemical phenomena; chronic myeloid leukemia; circular dichroism; deep neural network; differential scanning calorimetry; Drosophila melanogaster; electron microscopy; electron spin resonance; fluorescence correlation spectroscopy; fluorescence microscopy; fluorescence recovery after photobleaching; fluorescence resonance energy transfer; frontotemporal dementia; gene mutation; gene sequence; human; Huntington chorea; infrared spectroscopy; mitosis; molecular dynamics; molecular weight; Monte Carlo method; neutron scattering; nonhuman; nuclear export signal; nuclear localization signal; nuclear magnetic resonance spectroscopy; *nuclear pore complex; nucleocytoplasmic transport; Parkinson disease; *phase separation; prion disease; protein structure; radiation scattering; Raman spectrometry; signal transduction; static electricity; stomach carcinoma; support vector machine; thyroid papillary carcinoma; ultracentrifugation; Xenopus laevis.

Link to the Ovid Full Text or citation:

[Click here for full text options](https://ovidsp.ovid.com/ovidweb.cgi?T=JS&CSC=Y&NEWS=N&PAGE=fulltext&D=emed23&AN=2016359870)

Link to the External Link Resolver:

[SFX](https://sfx-86scu.hosted.exlibrisgroup.com.cn/86scu?sid=OVID:embase&id=pmid:34995711&id=doi:10.1016%2Fj.bbamcr.2021.119205&issn=01674889&isbn=&volume=1869&issue=4&spage=119205&pages=&date=2022&title=Biochimica+et+Biophysica+Acta+-+Molecular+Cell+Research&atitle=Phase+separation+of+FG-nucleoporins+in+nuclear+pore+complexes&aulast=Nag&pid=<author>Nag+N.%3BSasidharan+S.%3BUversky+V.N.%3BSaudagar+P.%3BTripathi+T.<%2Fauthor><AN>2016359870<%2FAN><DT>Article<%2FDT>)

41.

Rapid identification of papillary thyroid carcinoma and papillary microcarcinoma based on serum Raman spectroscopy combined with machine learning models.

Song H., Dong C., Zhang X., Wu W., Ma B., Chen F., Chen C., Lv X.

Photodiagnosis and Photodynamic Therapy. 37 (no pagination), 2022. Article Number: 102647. Date of Publication: March 2022.

AN: 2015782587

Thyroid carcinoma is with the highest diagnosis rate in the endocrine system, and its main histological subtype is papillary thyroid carcinoma (PTC) accounting for 80% of thyroid malignancies. In recent years, the incidence of thyroid cancer has increased exponentially, and its substantial increase was closely related to the overdiagnosis of papillary microcarcinoma (PMC). Therefore, early and accurate identification of PTC and PMC can prevent patients from over treatment. This study aimed to identify PTC and PMC using Raman spectroscopy. We collected serum Raman spectra from 16 patients with PTC and 31 patients with PMC. Firstly, the collected imbalance data were preprocessed using the synthetic minority over-sampling technique (SMOTE). Then, the equalized data were dimensionality reduced by principal component analysis (PCA). Finally, the processed data were fed into the single decision tree (DT) classifier, as well as the random forest (RF) built on the idea of Boosting ensemble and the Adaptive Boosting (Adaboost) model built on the idea of Bagging ensemble for classification. The classification accuracy of the three models in the testing set were 75.38%, 81.54%, and 84.61%, respectively. Compared with the DT classifier, the accuracy of the models introducing the idea of ensemble learning was enhanced by 6.16% and 9.23%, respectively. The best model was the Adaboost. This result demonstrates that serum Raman spectroscopy combined with an ensemble learning algorithm was feasible in rapidly identifying PTC and PMC. At the same time, the method has great potential for application in the field of clinical diagnosis.

Copyright © 2021 Elsevier B.V.

PMID

34818598 [<https://www.ncbi.nlm.nih.gov/pubmed/?term=34818598>]

Institution

(Song, Dong, Ma) Department of Breast, Head and Neck Surgery, Xinjiang Medical University Affiliated Tumor Hospital, Urumqi, China (Wu, Chen, Lv) College of Software, Xinjiang University, Urumqi 830046, China

(Chen, Lv) Key Laboratory of Signal Detection and Processing, Xinjiang University, Urumqi 830046, China

(Zhang, Chen, Chen, Lv) College of Information Science and Engineering, Xinjiang University, Urumqi 830046, China

Publisher

Elsevier B.V.

Emtree Heading

adult; article; blood sampling; classifier; clinical article; controlled study; cross validation; decision tree; follow up; human; learning algorithm; *machine learning; performance indicator; prediction; principal component analysis; *Raman spectrometry; *serum; *thyroid papillary carcinoma/di [Diagnosis]; spectrometer; SR-510 Pro.

Candidate Terms

SR-510 Pro [device term]

Device Index Terms

spectrometer.

Other Index Terms

adult; Article; blood sampling; classifier; clinical article; controlled study; cross validation; decision tree; follow up; human; learning algorithm; *machine learning; performance indicator; prediction; principal component analysis; *Raman spectrometry; *serum; *thyroid papillary carcinoma / *diagnosis.

Link to the Ovid Full Text or citation:

[Click here for full text options](https://ovidsp.ovid.com/ovidweb.cgi?T=JS&CSC=Y&NEWS=N&PAGE=fulltext&D=emed23&AN=2015782587)

Link to the External Link Resolver:

[SFX](https://sfx-86scu.hosted.exlibrisgroup.com.cn/86scu?sid=OVID:embase&id=pmid:34818598&id=doi:10.1016%2Fj.pdpdt.2021.102647&issn=15721000&isbn=&volume=37&issue=&spage=102647&pages=&date=2022&title=Photodiagnosis+and+Photodynamic+Therapy&atitle=Rapid+identification+of+papillary+thyroid+carcinoma+and+papillary+microcarcinoma+based+on+serum+Raman+spectroscopy+combined+with+machine+learning+models&aulast=Song&pid=<author>Song+H.%3BDong+C.%3BZhang+X.%3BWu+W.%3BMa+B.%3BChen+F.%3BChen+C.%3BLv+X.<%2Fauthor><AN>2015782587<%2FAN><DT>Article<%2FDT>)

42.

Advanced CT and MR Imaging of the Posttreatment Head and Neck.

Lobo R., Turk S., Bapuraj J.R., Srinivasan A.

Neuroimaging Clinics of North America. 32(1) (pp 133-144), 2022. Date of Publication: February 2022.

AN: 2015669813

PMID

34809834 [<https://www.ncbi.nlm.nih.gov/pubmed/?term=34809834>]

Institution

(Lobo, Turk) Neuroradiology Division, Radiology, Michigan Medicine, 1500 E Medical Center Drive, Ann Arbor, MI 48109, United States (Bapuraj, Srinivasan) Neuroradiology Division, Radiology, Michigan Medicine, 1500 E Medical Center Drive, B2A209, Ann Arbor, MI 48109, United States

Publisher

W.B. Saunders

Emtree Heading

apparent diffusion coefficient; arterial spin labeling; BOLD signal; cancer free survival; cancer prognosis; cancer recurrence; cancer regression; cancer staging; capillary permeability; chemoradiotherapy; *computer assisted tomography; diagnostic accuracy; diffusion weighted imaging; dynamic contrast-enhanced magnetic resonance imaging; gross tumor volume; *head and neck squamous cell carcinoma/di [Diagnosis]; *head and neck squamous cell carcinoma/dt [Drug Therapy]; *head and neck squamous cell carcinoma/rt [Radiotherapy]; human; image analysis; lymph node metastasis/di [Diagnosis]; magnetic field; *nuclear magnetic resonance imaging; overall survival; predictive value; progression free survival; proton nuclear magnetic resonance; radiation dose; Raman spectrometry; receiver operating characteristic; review; sensitivity and specificity; treatment response; tumor blood flow; antineoplastic agent/dt [Drug Therapy]; antineoplastic agent/tm [Unexpected Outcome of Drug Treatment]; gadolinium.

Drug Index Terms

antineoplastic agent / drug therapy / unexpected outcome of drug treatment; gadolinium.

Other Index Terms

apparent diffusion coefficient; arterial spin labeling; BOLD signal; cancer free survival; cancer prognosis; cancer recurrence; cancer regression; cancer staging; capillary permeability; chemoradiotherapy; *computer assisted tomography; diagnostic accuracy; diffusion weighted imaging; dynamic contrast-enhanced magnetic resonance imaging; gross tumor volume; *head and neck squamous cell carcinoma / *diagnosis / *drug therapy / *radiotherapy; human; image analysis; lymph node metastasis / diagnosis; magnetic field; *nuclear magnetic resonance imaging; overall survival; predictive value; progression free survival; proton nuclear magnetic resonance; radiation dose; Raman spectrometry; receiver operating characteristic; Review; sensitivity and specificity; treatment response; tumor blood flow.

Link to the Ovid Full Text or citation:

[Click here for full text options](https://ovidsp.ovid.com/ovidweb.cgi?T=JS&CSC=Y&NEWS=N&PAGE=fulltext&D=emed23&AN=2015669813)

Link to the External Link Resolver:

[SFX](https://sfx-86scu.hosted.exlibrisgroup.com.cn/86scu?sid=OVID:embase&id=pmid:34809834&id=doi:10.1016%2Fj.nic.2021.08.013&issn=10525149&isbn=&volume=32&issue=1&spage=133&pages=133-144&date=2022&title=Neuroimaging+Clinics+of+North+America&atitle=Advanced+CT+and+MR+Imaging+of+the+Posttreatment+Head+and+Neck&aulast=Lobo&pid=<author>Lobo+R.%3BTurk+S.%3BBapuraj+J.R.%3BSrinivasan+A.<%2Fauthor><AN>2015669813<%2FAN><DT>Review<%2FDT>)

43.

Deep learning-based image processing in optical microscopy.

Melanthota S.K., Gopal D., Chakrabarti S., Kashyap A.A., Radhakrishnan R., Mazumder N.

Biophysical Reviews. 14(2) (pp 463-481), 2022. Date of Publication: April 2022.

AN: 2015559123

Optical microscopy has emerged as a key driver of fundamental research since it provides the ability to probe into imperceptible structures in the biomedical world. For the detailed investigation of samples, a high-resolution image with enhanced contrast and minimal damage is preferred. To achieve this, an automated image analysis method is preferable over manual analysis in terms of both speed of acquisition and reduced error accumulation. In this regard, deep learning (DL)-based image processing can be highly beneficial. The review summarises and critiques the use of DL in image processing for the data collected using various optical microscopic techniques. In tandem with optical microscopy, DL has already found applications in various problems related to image classification and segmentation. It has also performed well in enhancing image resolution in smartphone-based microscopy, which in turn enablse crucial medical assistance in remote places. Graphical abstract: [Figure not available: see fulltext.].

Copyright © 2022, The Author(s).

Author NameID

Mazumder, Nirmal; ORCID: <https://orcid.org/0000-0001-8068-6484>

Institution

(Melanthota, Mazumder) Department of Biophysics, Manipal School of Life Sciences, Manipal Academy of Higher Education, Karnataka, Manipal 576104, India (Gopal, Chakrabarti) Department of Bioinformatics, Manipal School of Life Sciences, Manipal Academy of Higher Education, Karnataka, Manipal 576104, India

(Kashyap) Computer Science and Engineering, Manipal Institute of Technology, Manipal Academy of Higher Education, Karnataka, Manipal 576104, India

(Radhakrishnan) Department of Oral Pathology, Manipal College of Dental Sciences, Manipal, Manipal Academy of Higher Education, Manipal 576104, India

Publisher

Springer Science and Business Media Deutschland GmbH

Emtree Heading

adenocarcinoma; artificial neural network; bright field microscopy; cell nucleus; cell vacuole; convolutional neural network; cytoplasm; *deep learning; diagnostic accuracy; endoplasmic reticulum; endosome; fluorescence imaging; fluorescence microscopy; Golgi complex; health care system; human; hyperkeratosis; image analysis; *image processing; image quality; keratosis; learning algorithm; light-sheet microscopy; machine learning; microfluidics; *microscopy; mitochondrion; mouth cancer; multiphoton microscopy; non small cell lung cancer; nucleolus; phase contrast microscopy; predictive value; Raman spectrometry; receiver operating characteristic; review; squamous cell carcinoma; actin; eosin; hematoxylin; microsphere; medical device; smartphone; quantitative phase microscopy; Raman microscopy; oral cancer screening device.

Candidate Terms

quantitative phase microscopy [other term] raman microscopy [other term]

oral cancer screening device [device term]

Device Index Terms

medical device; smartphone.

Drug Index Terms

actin; eosin; hematoxylin; microsphere.

Other Index Terms

adenocarcinoma; artificial neural network; bright field microscopy; cell nucleus; cell vacuole; convolutional neural network; cytoplasm; *deep learning; diagnostic accuracy; endoplasmic reticulum; endosome; fluorescence imaging; fluorescence microscopy; Golgi complex; health care system; human; hyperkeratosis; image analysis; *image processing; image quality; keratosis; learning algorithm; light-sheet microscopy; machine learning; microfluidics; *microscopy; mitochondrion; mouth cancer; multiphoton microscopy; non small cell lung cancer; nucleolus; phase contrast microscopy; predictive value; Raman spectrometry; receiver operating characteristic; Review; squamous cell carcinoma.

Link to the Ovid Full Text or citation:

[Click here for full text options](https://ovidsp.ovid.com/ovidweb.cgi?T=JS&CSC=Y&NEWS=N&PAGE=fulltext&D=emed23&AN=2015559123)

Link to the External Link Resolver:

[SFX](https://sfx-86scu.hosted.exlibrisgroup.com.cn/86scu?sid=OVID:embase&id=pmid:&id=doi:10.1007%2Fs12551-022-00949-3&issn=18672450&isbn=&volume=14&issue=2&spage=463&pages=463-481&date=2022&title=Biophysical+Reviews&atitle=Deep+learning-based+image+processing+in+optical+microscopy&aulast=Melanthota&pid=<author>Melanthota+S.K.%3BGopal+D.%3BChakrabarti+S.%3BKashyap+A.A.%3BRadhakrishnan+R.%3BMazumder+N.<%2Fauthor><AN>2015559123<%2FAN><DT>Review<%2FDT>)

44.

Surgical tumour margins and their significance in oral squamous cell carcinoma.

Brennan P.A., Dylgjeri F., Coletta R.D., Arakeri G., Goodson A.M.

Journal of Oral Pathology and Medicine. 51(4) (pp 311-314), 2022. Date of Publication: April 2022.

AN: 2015046814

There are many prognostic indicators used to predict tumour recurrence and overall prognosis in oral squamous cell carcinoma (OSCC). Most of these biological factors cannot be directly influenced by clinicians managing these heterogeneous group of tumours. Excision margins can potentially be increased at the time of surgery by including more normal tissue than the commonly accepted 1 cm resection distance from the macroscopic tumour edge. However, this can lead to poorer quality of life for patients and does not necessarily address microscopic extensions or dicohesive patterns of tumour growth. Surgical margins can be affected by tissue shrinkage immediately following resection and the choice of instrument used for surgery. Currently, most regard a clear resection margin as being >5 mm, a close margin as more than 1 mm but <5 mm and an involved margin <1 mm. In this article, we provide a brief overview of tumour margins in OSCC, including several recently published large meta-analyses. Based upon these and other studies, there is still conflicting data in the literature about the ideal margin for OSCC. There is a growing body of evidence that suggests a clearance of 1 mm might be adequate for some cancers. However, adequacy of resection should be considered along with the many other prognostic indicators of OSCC when the multi-disciplinary team considers further treatment for these patients.

Copyright © 2022 John Wiley & Sons A/S. Published by John Wiley & Sons Ltd.

PMID

35080080 [<https://www.ncbi.nlm.nih.gov/pubmed/?term=35080080>]

Institution

(Brennan, Dylgjeri, Goodson) Department of Oral and Maxillofacial Surgery, Queen Alexandra Hospital, Portsmouth, United Kingdom (Coletta) Graduate Program in Oral Biology, School of Dentistry, University of Campinas, Sao Paulo, Piracicaba, Brazil

(Coletta) Department of Oral Diagnosis, School of Dentistry, University of Campinas, Sao Paulo, Piracicaba, Brazil

(Arakeri) Department of Head and Neck Oncology, Centre for Academic Research, HCG Cancer Center, Karnataka, Bengaluru, India

(Arakeri) Department of Oral and Maxillofacial Surgery, Navodaya Dental College and Hospital, Karnataka, Raichur, India

Publisher

John Wiley and Sons Inc

Emtree Heading

adjuvant therapy; bone resection; cancer prognosis; *cancer surgery; confocal microscopy; depth of invasion; disease specific survival; female; free tissue graft; human; male; meta analysis; *mouth squamous cell carcinoma/di [Diagnosis]; *mouth squamous cell carcinoma/su [Surgery]; multidisciplinary team; optical coherence tomography; overall survival; quality of life; Raman spectrometry; review; *surgical margin; systematic review; tumor growth; tumor recurrence.

Other Index Terms

adjuvant therapy; bone resection; cancer prognosis; *cancer surgery; confocal microscopy; depth of invasion; disease specific survival; female; free tissue graft; human; male; meta analysis; *mouth squamous cell carcinoma / *diagnosis / *surgery; multidisciplinary team; optical coherence tomography; overall survival; quality of life; Raman spectrometry; Review; *surgical margin; systematic review; tumor growth; tumor recurrence.

Link to the Ovid Full Text or citation:

[Click here for full text options](https://ovidsp.ovid.com/ovidweb.cgi?T=JS&CSC=Y&NEWS=N&PAGE=fulltext&D=emed23&AN=2015046814)

Link to the External Link Resolver:

[SFX](https://sfx-86scu.hosted.exlibrisgroup.com.cn/86scu?sid=OVID:embase&id=pmid:35080080&id=doi:10.1111%2Fjop.13276&issn=09042512&isbn=&volume=51&issue=4&spage=311&pages=311-314&date=2022&title=Journal+of+Oral+Pathology+and+Medicine&atitle=Surgical+tumour+margins+and+their+significance+in+oral+squamous+cell+carcinoma&aulast=Brennan&pid=<author>Brennan+P.A.%3BDylgjeri+F.%3BColetta+R.D.%3BArakeri+G.%3BGoodson+A.M.<%2Fauthor><AN>2015046814<%2FAN><DT>Review<%2FDT>)

45.

Deep reinforced neural network model for cyto-spectroscopic analysis of epigenetic markers for automated oral cancer risk prediction.

Ghosh A., Chaudhuri D., Adhikary S., Chatterjee K., Roychowdhury A., Das A.K., Barui A.

Chemometrics and Intelligent Laboratory Systems. 224 (no pagination), 2022. Article Number: 104548. Date of Publication: 15 May 2022.

AN: 2017425894

Understanding epigenetic changes can provide vital information for early stage oral cancer diagnosis. Vibrational spectroscopy methods like Raman spectroscopy (RS) and Fourier Transform Infrared Spectroscopy (FTIR) can provide several advantages over conventional molecular biology methods, by incorporating information from fingerprint regions. Moreover, application of advanced spectral analysis tools like deep learning (DL) techniques can be efficiently applied for analyzing the large spectral dataset and extracting the vital features. Epigenetic changes are identifies in oral epithelial cells of healthy individuals, oral leucoplakia and squamous cell carcinoma patients through analysis of Raman (400-1800 cm-1) and FTIR data (700-2000 cm-1). Deep reinforced neural network (DRNN) model is employed to classify the epigenetic changes identified from the Raman and FTIR spectra. Feature extraction layer of DL model uses peak detection layer and reinforced learning layer to identify significant epigenetic features. Classification layer is made up of N numbers of back propagated Artificial Neural Network (ANN) layers. DL model developed is fully automated and overcome the wave shift problem of spectroscopic data. Testing accuracy of the proposed DRNN model is 83.33%. Class wise accuracies for NRML, OLPK and OSCC are 83.3%, 87% and 95.24%, respectively. Proposed DRNN model attains an overall ROC of 0.88 Present study employs combination of two complementary vibrational spectroscopy methods for oral cancer detection and chemometric analysis of the spectral features with DRNN mode. Identification of the epigenetic changes and utilization of the knowledge in cancer prediction will enable the proposed study to develop smart point-of-care diagnostic system.

Copyright © 2022 Elsevier B.V.

Author NameID

Barui, Ananya; ORCID: <https://orcid.org/0000-0001-9710-9448>

Institution

(Ghosh, Chaudhuri, Adhikary, Barui) Centre for Healthcare Science and Technology, Indian Institute of Engineering, Science and Technology, Shibpur, West-Bengal, Howrah 711103, India (Chatterjee) Department of Oral and Maxillofacial Pathology, Buddha Institute of Dental Sciences, West TV Tower, Gandhinagar, Kankarabagh, Bihar, Patna 800020, India

(Roychowdhury) Department of Applied Mechanics, Indian Institute of Engineering, Science and Technology, Shibpur, West-Bengal, Howrah 711103, India

(Das) Department of Computer Science and Technology, Indian Institute of Engineering, Science and Technology, Shibpur, West-Bengal, Howrah 711103, India

Publisher

Elsevier B.V.

Emtree Heading

article; *cancer risk; cancer staging; chemometrics; clinical article; controlled study; *cytophotometry; deep learning; *deep neural network; diagnostic accuracy; diagnostic test accuracy study; discriminant analysis; *epigenetics; epithelium cell; Fourier transform infrared spectroscopy; histopathology; human; human tissue; *mouth cancer/di [Diagnosis]; mouth squamous cell carcinoma/di [Diagnosis]; oral leukoplakia/di [Diagnosis]; predictive value; Raman spectrometry; receiver operating characteristic; *risk assessment; sensitivity and specificity; signal noise ratio; validation process; vibrational spectroscopy.

Other Index Terms

Article; *cancer risk; cancer staging; chemometrics; clinical article; controlled study; *cytophotometry; deep learning; *deep neural network; diagnostic accuracy; diagnostic test accuracy study; discriminant analysis; *epigenetics; epithelium cell; Fourier transform infrared spectroscopy; histopathology; human; human tissue; *mouth cancer / *diagnosis; mouth squamous cell carcinoma / diagnosis; oral leukoplakia / diagnosis; predictive value; Raman spectrometry; receiver operating characteristic; *risk assessment; sensitivity and specificity; signal noise ratio; validation process; vibrational spectroscopy.

Link to the Ovid Full Text or citation:

[Click here for full text options](https://ovidsp.ovid.com/ovidweb.cgi?T=JS&CSC=Y&NEWS=N&PAGE=fulltext&D=emed23&AN=2017425894)

Link to the External Link Resolver:

[SFX](https://sfx-86scu.hosted.exlibrisgroup.com.cn/86scu?sid=OVID:embase&id=pmid:&id=doi:10.1016%2Fj.chemolab.2022.104548&issn=01697439&isbn=&volume=224&issue=&spage=104548&pages=&date=2022&title=Chemometrics+and+Intelligent+Laboratory+Systems&atitle=Deep+reinforced+neural+network+model+for+cyto-spectroscopic+analysis+of+epigenetic+markers+for+automated+oral+cancer+risk+prediction&aulast=Ghosh&pid=<author>Ghosh+A.%3BChaudhuri+D.%3BAdhikary+S.%3BChatterjee+K.%3BRoychowdhury+A.%3BDas+A.K.%3BBarui+A.<%2Fauthor><AN>2017425894<%2FAN><DT>Article<%2FDT>)

46.

Unmet Needs and Perspectives in Oral Cancer Prevention.

Bouaoud J., Bossi P., Elkabets M., Schmitz S., van Kempen L.C., Martinez P., Jagadeeshan S., Breuskin I., Puppels G.J., Hoffmann C., Hunter K.D., Simon C., Machiels J.-P., Gregoire V., Bertolus C., Brakenhoff R.H., Koljenovic S., Saintigny P.

Cancers. 14(7) (no pagination), 2022. Article Number: 1815. Date of Publication: April-1 2022.

AN: 2016116004

Oral potentially malignant disorders (OPMD) may precede oral squamous cell carcinoma (OSCC). Reported rates of malignant transformation of OPMD range from 3 to 50%. While some clinical, histological, and molecular factors have been associated with a high-risk OPMD, they are, to date, insufficiently accurate for treatment decision-making. Moreover, this range highlights differences in the clinical definition of OPMD, variation in follow-up periods, and molecular and biological heterogeneity of OPMD. Finally, while treatment of OPMD may improve outcome, standard therapy has been shown to be ineffective to prevent OSCC development in patients with OPMD. In this perspective paper, several experts discuss the main challenges in oral cancer prevention, in particular the need to (i) to define an OPMD classification system by integrating new pathological and molecular characteristics, aiming (ii) to better identify OPMD at high risk of malignant transformation, and (iii) to develop treatment strategies to eradicate OPMD or prevent malignant transformation.

Copyright © 2022 by the authors. Licensee MDPI, Basel, Switzerland.

Institution

(Bouaoud, Martinez, Saintigny) Centre de Recherche en Cancerologie de Lyon, Centre Leon Berard, CNRS 5286, INSERM 1052, Universite Claude Bernard Lyon 1, University Lyon, Lyon F-69008, France (Bouaoud, Martinez, Gregoire, Bertolus, Saintigny) Department of Translational Research and Innovation, Centre Leon Berard, Universite Claude Bernard Lyon 1, University Lyon, Lyon F-69008, France

(Bouaoud, Bertolus) Department of Maxillo-Facial Surgery, Assistance Publique des Hopitaux de Paris, Sorbonne Universite, Hopital Pitie-Salpetriere, Paris F-75013, France

(Bossi) Medical Oncology, ASST Spedali Civili Brescia, Brescia I-25064, Italy

(Bossi) Department of Medical and Surgical Specialties, Radiological Sciences and Public Health, University of Brescia, Brescia I-25123, Italy

(Elkabets, Jagadeeshan) The Shraga Segal Department of Microbiology, Immunology and Genetics, Ben-Gurion University of the Negev, Beer-Sheva 8410501, Israel

(Elkabets, Jagadeeshan) Faculty of Health Sciences, Ben-Gurion University of the Negev, Beer-Sheva 8410501, Israel

(Schmitz, Machiels) Department of Medical Oncology and Head and Neck Surgery, Institut Roi Albert II, Cliniques Universitaires Saint-Luc and Institut de Recherche Clinique et Experimentale (Pole MIRO), UCLouvain, Brussels 1200, Belgium

(van Kempen) Department of Pathology and Medical Biology, University Medical Center Groningen, University of Groningen, Groningen 9712 CP, Netherlands

(Breuskin) Department of Head and Neck Oncology, Gustave Roussy Cancer Campus, Villejuif F-94805, France

(Puppels) Department of Dermatology, Erasmus MC, University Medical Center Rotterdam, Room Ee-1691, P.O. Box 2040, CA Rotterdam 3000, Netherlands

(Hoffmann) INSERM U932 Research Unit, Department of Surgery, Institut Curie, PSL Research University, Paris F-75006, France

(Hunter) Unit of Oral and Maxillofacial Pathology, School of Clinical Dentistry, University of Sheffield, Sheffield S10 2TA, United Kingdom

(Simon) Department of Otolaryngology and Head and Neck Surgery, Lausanne University Hospital, Lausanne 1011, Switzerland

(Gregoire) Radiation Oncology Department, Centre Leon Berard, Universite Claude Bernard Lyon 1, University Lyon, Lyon F-69008, France

(Brakenhoff) Cancer Center Amsterdam, Section Head and Neck Cancer Biology & Immunology, Otolaryngology and Head and Neck Surgery, Vrije Universiteit Amsterdam, Amsterdam UMC, Amsterdam 1081 HV, Netherlands

(Koljenovic) Department of Pathology, Erasmus MC, University Medical Center Rotterdam, Rotterdam 3015 GD, Netherlands

(Saintigny) Department of Medical Oncology, Centre Leon Berard, Universite Claude Bernard Lyon 1, University Lyon, 28 Promenade Lea et Napoleon Bullukian, Lyon F-69008, France

Publisher

MDPI

Emtree Heading

artificial intelligence; autofluorescence imaging; cancer cell culture; cancer classification; *cancer prevention; cancer risk; clinical decision making; clinical feature; clinical outcome; early cancer diagnosis; endoscopy; fluorescence imaging; follow up; genetically engineered mouse strain; heterozygosity loss; high risk patient; histopathology; human; in vivo study; malignant transformation; mouse model; mouth cancer/di [Diagnosis]; mouth cancer/et [Etiology]; mouth cancer/pc [Prevention]; mouth flora; *mouth squamous cell carcinoma/di [Diagnosis]; *mouth squamous cell carcinoma/et [Etiology]; *mouth squamous cell carcinoma/pc [Prevention]; narrow band imaging; oral potentially malignant disorder/di [Diagnosis]; precancer; preclinical study; Raman spectrometry; review; risk factor; three dimensional cell culture; tissue culture; tumor microenvironment; two dimensional cell culture; *unmet medical need; carcinogen; high resolution microendoscopy.

Candidate Terms

high resolution microendoscopy [other term]

Drug Index Terms

carcinogen.

Other Index Terms

artificial intelligence; autofluorescence imaging; cancer cell culture; cancer classification; *cancer prevention; cancer risk; clinical decision making; clinical feature; clinical outcome; early cancer diagnosis; endoscopy; fluorescence imaging; follow up; genetically engineered mouse strain; heterozygosity loss; high risk patient; histopathology; human; in vivo study; malignant transformation; mouse model; mouth cancer / diagnosis / etiology / prevention; mouth flora; *mouth squamous cell carcinoma / *diagnosis / *etiology / *prevention; narrow band imaging; oral potentially malignant disorder / diagnosis; precancer; preclinical study; Raman spectrometry; Review; risk factor; three dimensional cell culture; tissue culture; tumor microenvironment; two dimensional cell culture; *unmet medical need.

Link to the Ovid Full Text or citation:

[Click here for full text options](https://ovidsp.ovid.com/ovidweb.cgi?T=JS&CSC=Y&NEWS=N&PAGE=fulltext&D=emed23&AN=2016116004)

Link to the External Link Resolver:

[SFX](https://sfx-86scu.hosted.exlibrisgroup.com.cn/86scu?sid=OVID:embase&id=pmid:&id=doi:10.3390%2Fcancers14071815&issn=20726694&isbn=&volume=14&issue=7&spage=1815&pages=&date=2022&title=Cancers&atitle=Unmet+Needs+and+Perspectives+in+Oral+Cancer+Prevention&aulast=Bouaoud&pid=<author>Bouaoud+J.%3BBossi+P.%3BElkabets+M.%3BSchmitz+S.%3Bvan+Kempen+L.C.%3BMartinez+P.%3BJagadeeshan+S.%3BBreuskin+I.%3BPuppels+G.J.%3BHoffmann+C.%3BHunter+K.D.%3BSimon+C.%3BMachiels+J.-P.%3BGregoire+V.%3BBertolus+C.%3BBrakenhoff+R.H.%3BKoljenovic+S.%3BSaintigny+P.<%2Fauthor><AN>2016116004<%2FAN><DT>Review<%2FDT>)

47.

Synthesis of Electron-Rich Porous Organic Polymers via Schiff-Base Chemistry for Efficient Iodine Capture.

Tian P., Ai Z., Hu H., Wang M., Li Y., Gao X., Qian J., Su X., Xiao S., Xu H., Lu F., Gao Y.

Molecules (Basel, Switzerland). 27(16) (no pagination), 2022. Date of Publication: 12 Aug 2022.

AN: 638847238

As one of the main nuclear wastes generated in the process of nuclear fission, radioactive iodine has attracted worldwide attention due to its harm to public safety and environmental pollution. Therefore, it is of crucial importance to develop materials that can rapidly and efficiently capture radioactive iodine. Herein, we report the construction of three electron-rich porous organic polymers (POPs), denoted as POP-E, POP-T and POP-P via Schiff base polycondensations reactions between Td-symmetric adamantane knot and four-branched "linkage" molecules. We demonstrated that all the three POPs showed high iodine adsorption capability, among which the adsorption capacity of POP-T for iodine vapor reached up to 3.94 g.g-1 and the removal rate of iodine in n-hexane solution was up to 99%. The efficient iodine capture mechanism of the POP-T was investigated through systematic comparison of Fourier transform infrared spectroscopy (FT-IR), Raman spectroscopy and X-ray photoelectron spectroscopy (XPS) before and after iodine adsorption. The unique pi-pi conjugated system between imine bonds linked aromatic rings with iodine result in charge-transfer complexes, which explains the exceptional iodine capture capacity. Additionally, the introduction of heteroatoms into the framework would also enhance the iodine adsorption capability of POPs. Good retention behavior and recycling capacity were also observed for the POPs.

PMID

36014397 [<https://www.ncbi.nlm.nih.gov/pubmed/?term=36014397>]

Author NameID

Gao, Yanan; ORCID: <https://orcid.org/0000-0002-5543-6296>

Institution

(Tian, Ai, Hu, Wang, Li, Gao, Qian, Su, Lu, Gao) Key Laboratory of Ministry of Education for Advanced Materials in Tropical Island Resources, Department of Chemistry and Chemical Engineering, Hainan University, No 58, Haikou 570228, China (Xiao) China Institute of Atomic Energy, Beijing 102413, China

(Xu) School of Science, Qiongtai Normal University, Haikou 571127, China

Publisher

NLM (Medline)

Emtree Heading

chemistry; electron; human; infrared spectroscopy; porosity; *thyroid tumor; iodide; *iodine; polymer; radioactive iodine; Schiff base.

Drug Index Terms

iodide; *iodine; polymer; radioactive iodine; Schiff base.

Other Index Terms

chemistry; electron; human; infrared spectroscopy; porosity; *thyroid tumor.

Link to the Ovid Full Text or citation:

[Click here for full text options](https://ovidsp.ovid.com/ovidweb.cgi?T=JS&CSC=Y&NEWS=N&PAGE=fulltext&D=emed23&AN=638847238)

Link to the External Link Resolver:

[SFX](https://sfx-86scu.hosted.exlibrisgroup.com.cn/86scu?sid=OVID:embase&id=pmid:36014397&id=doi:10.3390%2Fmolecules27165161&issn=14203049&isbn=&volume=27&issue=16&spage=5161&pages=&date=2022&title=Molecules+(Basel%2C+Switzerland)&atitle=Synthesis+of+Electron-Rich+Porous+Organic+Polymers+via+Schiff-Base+Chemistry+for+Efficient+Iodine+Capture&aulast=Tian&pid=<author>Tian+P.%3BAi+Z.%3BHu+H.%3BWang+M.%3BLi+Y.%3BGao+X.%3BQian+J.%3BSu+X.%3BXiao+S.%3BXu+H.%3BLu+F.%3BGao+Y.<%2Fauthor><AN>638847238<%2FAN><DT>Article<%2FDT>)

48.

Corrigendum to <Diverse spectral band-based deep residual network for tongue squamous cell carcinoma classification using fiber optic Raman spectroscopy> <[Photodiagnosis and Photodynamic Therapy, Volume 32, December 2020, 102048]> (Photodiagnosis and Photodynamic Therapy (2020) 32, (S1572100020304026), (10.1016/j.pdpdt.2020.102048)).

Ding J., Yu M., Zhu L., Zhang T., Xia J., Sun G.

Photodiagnosis and Photodynamic Therapy. 39 (no pagination), 2022. Article Number: 102981. Date of Publication: September 2022.

AN: 2019632389

The authors would like to inform the readers that the Funding support of this research is corrected to below: "This research was funded by R&D Program of Beijing Municipal Education Commission with grant number KM202011232007, Natural Science Foundation of Beijing - Program of Original Innovation Joint Foundation of Haidian District with grant number L182066, National Natural Science Foundation of China (NSFC) with grant number 11904026, and Beijing Natural Science Foundation with grant number 1194021.". The authors would like to apologise for any inconvenience caused.

Copyright © 2022

Institution

(Ding, Yu, Zhu, Xia, Sun) Key Laboratory of the Ministry of Education for Optoelectronic Measurement Technology and Instrument, Beijing Information Science and Technology University, Beijing 100192, China (Zhu, Xia) School of Instrument Science and Opto-electronics Engineering, Hefei University of Technology, Hefei 230009, China

(Zhang) Department of stomatology, Peking Union Medical College Hospital, No. 1 Shuaifuyuan Wangfujing, Dongcheng District, Beijing 100730, China

Publisher

Elsevier B.V.

Emtree Heading

*erratum.

Other Index Terms

*erratum.

Link to the Ovid Full Text or citation:

[Click here for full text options](https://ovidsp.ovid.com/ovidweb.cgi?T=JS&CSC=Y&NEWS=N&PAGE=fulltext&D=emed23&AN=2019632389)

Link to the External Link Resolver:

[SFX](https://sfx-86scu.hosted.exlibrisgroup.com.cn/86scu?sid=OVID:embase&id=pmid:&id=doi:10.1016%2Fj.pdpdt.2022.102981&issn=15721000&isbn=&volume=39&issue=&spage=102981&pages=&date=2022&title=Photodiagnosis+and+Photodynamic+Therapy&atitle=Corrigendum+to+<Diverse+spectral+band-based+deep+residual+network+for+tongue+squamous+cell+carcinoma+classification+using+fiber+optic+Raman+spectroscopy>+<%5BPhotodiagnosis+and+Photodynamic+Therapy%2C+Volume+32%2C+December+2020%2C+102048%5D>+(Photodiagnosis+and+Photodynamic+Therapy+(2020)+32%2C+(S1572100020304026)%2C+(10.1016%2Fj.pdpdt.2020.102048))&aulast=Ding&pid=<author>Ding+J.%3BYu+M.%3BZhu+L.%3BZhang+T.%3BXia+J.%3BSun+G.<%2Fauthor><AN>2019632389<%2FAN><DT>Erratum<%2FDT>)

49.

The effect of therapeutic radiation on dental enamel and dentin: A systematic review.

Douchy L., Gauthier R., Abouelleil-Sayed H., Colon P., Grosgogeat B., Bosco J.

Dental materials : official publication of the Academy of Dental Materials. 38(7) (pp e181-e201), 2022. Date of Publication: 01 Jul 2022.

AN: 638338753

OBJECTIVES: The conventional radiotherapy protocol to treat head-and-neck cancer is usually followed by tooth-decay onset. Radiation impact on mineralized tooth structures is not well-understood. This systematic review aimed to collect the recorded effects of therapeutic radiation on tooth chemical, structural and mechanical properties, in relation with their means of investigation. DATA: Systematic search (January 01 2012 - September 30 2021) terms were "Radiotherapy", "Radiation effects", "Dental enamel", "Dentin", "Human" and "Radiotherapy" NOT "Laser". SOURCES: PubMed, DOSS and Embase databases were searched. STUDY SELECTION: Selected studies compared dental enamel, coronal and root dentin properties before and after in vitro or in vivo irradiation up to 80 Gy.

RESULT(S): The systematic search identified 353 different articles, with 28 satisfying inclusion criteria. Their reference lists provided two more. Twenty-two studies evaluated dental enamel evolution, nine assessed coronal dentin and eight concerned root dentin. Coronal and root dentin results indicate a major impact of the radiation on their organic matrix. Dental enamel's chemical properties are less modified. Enamel and root dentin's hardness are decreased by therapeutic radiation, but no consensus arises for coronal dentin.

CONCLUSION(S): Our findings revealed some interesting information about enzymatic degradation mechanisms of dentin organic matrix and highlighted that dental hard-tissue characterization requires highly specific expertise in materials science. That scientific knowledge is necessary to design suitable protocols, adequately analyze the obtained data, and, thus, provide relevant conclusions. CLINICAL SIGNIFICANCE STATEMENT: Better knowledge and understanding of the mechanisms involved in the degradation of enamel and dentin would enable development of new preventive and therapeutic methods for improved medical care of patients undergoing radiotherapy.

Copyright © 2022 Elsevier Inc. All rights reserved.

PMID

35570008 [<https://www.ncbi.nlm.nih.gov/pubmed/?term=35570008>]

Institution

(Douchy, Colon) Universite de Lyon, Universite Lyon 1, Laboratoire des Multimateriaux et des Interfaces, UMR CNRS, 5615, Lyon, France; Universite de Paris, Faculte d'Odontologie, Paris, France; Assistance Publique-Hopitaux de Paris, Hopital Rothschild, Service Odontologie, Paris, France (Gauthier) Universite de Lyon, Laboratoire des Multimateriaux et des Interfaces, UMR CNRS, Universite Lyon 1, Lyon, France

(Abouelleil-Sayed) Universite de Lyon, Universite Lyon 1, Laboratoire des Multimateriaux et des Interfaces, UMR CNRS, 5615, Lyon, France; Universite de Lyon, Universite Lyon 1, Faculte d'Odontologie, Lyon, France

(Grosgogeat) Universite de Lyon, Universite Lyon 1, Laboratoire des Multimateriaux et des Interfaces, UMR CNRS, 5615, Lyon, France; Hospices Civils de Lyon, Service d'Odontologie, Lyon, France; Universite de Lyon, Universite Lyon 1, Faculte d'Odontologie, Lyon, France

(Bosco) Universite de Lyon, Universite Lyon 1, Laboratoire des Multimateriaux et des Interfaces, UMR CNRS, 5615, Lyon, France; Universite de Paris, Faculte d'Odontologie, Paris, France; Assistance Publique-Hopitaux de Paris, Hopital Pitie-Salpetriere, Service Odontologie, Paris, France

Publisher

NLM (Medline)

Emtree Heading

chemistry; *dental caries; dentin; enamel; human; *radiation injury; *tooth.

Other Index Terms

chemistry; *dental caries; dentin; enamel; human; *radiation injury; *tooth.

Link to the Ovid Full Text or citation:

[Click here for full text options](https://ovidsp.ovid.com/ovidweb.cgi?T=JS&CSC=Y&NEWS=N&PAGE=fulltext&D=emed23&AN=638338753)

Link to the External Link Resolver:

[SFX](https://sfx-86scu.hosted.exlibrisgroup.com.cn/86scu?sid=OVID:embase&id=pmid:35570008&id=doi:10.1016%2Fj.dental.2022.04.014&issn=18790097&isbn=&volume=38&issue=7&spage=e181&pages=e181-e201&date=2022&title=Dental+materials+%3A+official+publication+of+the+Academy+of+Dental+Materials&atitle=The+effect+of+therapeutic+radiation+on+dental+enamel+and+dentin%3A+A+systematic+review&aulast=Douchy&pid=<author>Douchy+L.%3BGauthier+R.%3BAbouelleil-Sayed+H.%3BColon+P.%3BGrosgogeat+B.%3BBosco+J.<%2Fauthor><AN>638338753<%2FAN><DT>Review<%2FDT>)

50.

Effect of paclitaxel stereochemistry on x-ray-triggered release of paclitaxel from CaWO4/paclitaxel-coloaded PEG-PLA nanoparticles.

Sarkar K., Torresgrossa-Allen S., Langer M.P., Durm G., Narayanan S., Elzey B.D., Won Y.-Y.

Cancer Research. Conference: American Association for Cancer Research Annual Meeting, ACCR 2020. New Orleans, LA United States. 82(12 Supplement) (no pagination), 2022. Date of Publication: June 2022.

AN: 638678709

Head and neck squamous cell carcinoma (HNSCC) is the 8th most common cancer in the United States predominantly affecting people over 65 years of age with an increasing rate of incidence across the world. Current therapies for HNSCC include surgical resection, chemotherapy (CT), and radiotherapy (RT). For locally advanced/unresectable HNSCC, the CT-RT combination ("chemoradiation") has been shown to be more effective than CT or RT alone, and is currently the standard of care. Intratumoral (IT) chemotherapy-based chemoradiation has the potential to overcome the limitations of conventional systemic CT-RT that severely affects a patient's quality of life. For realization of maximum benefits from IT CT-RT, our team has developed a radiation-controlled drug release nanoparticle formulation (paclitaxel (PTX) and CaWO4 nanoparticles (CWO NPs) co-encapsulated within a capsule formed by poly(ethylene glycol)-poly (lactic acid) (PEG-PLA), named "PEG-PLA/CWO/PTX NPs"). This unique formulation releases PTX only when it is exposed to X-ray irradiation. We have previously reported that IT-administered PEG-PLA/CWO/PTX NPs stay within the tumor for at least a month, producing significant therapeutic effects in terms of tumor suppression and survival in mouse models of HNSCC. This work demonstrates the effect of PTX stereochemistry on radiation-controlled release of the drug from a nano polymer matrix system (PEG-PLA/CWO/PTX NPs). The stereoisomertic characteristics of PTX products from two different manufacturers ("PTX-S", and "PTX-B") were analyzed by Raman spectroscopy, circular dichroism and 2D HMQC/NOESY NMR measurements. In their unencapsulated (free) state, PTX-S and PTX- B were comparable in their ability to kill cancer cells in vitro. However, they were found to be significantly different in water solubility; PTX-S (water solubility = 4.69 mug/mL) is about 19 times more water soluble than PTX-B (water solubility = 0.25 mug/mL). This difference in water solubility was found to cause a large difference in X-ray-triggered release kinetics of the PTX loaded within the PEG-PLA/CWO/PTX NPs in both in vitro and in vivo environments; PTX-S is released from PEG-PLA/CWO NPs significantly faster upon X-ray irradiation than PTX-B. This difference in release kinetics produced an interesting difference in their time-dependent therapeutic effects; at short times (< 1 month), concurrent PEG-PLA/CWO/PTX-S NPs produced a greater tumor suppression effect; on the other hand, PEG-PLA/CWO/PTX-B NPs had a longer lasting radio-sensitizing effect. In summary, the stereoisomers of PTX exhibit significantly different PK characteristics when used with controlled release carriers, even though they are pharmacologically indistinguishable in their unformulated form.

Publisher

American Association for Cancer Research Inc.

Emtree Heading

adult; animal experiment; animal model; cancer cell; *cancer combination chemotherapy; cancer inhibition; cancer survival; chemoradiotherapy; chemotherapy; circular dichroism; conference abstract; controlled drug release; controlled study; drug formulation; *drug solubility; head and neck squamous cell carcinoma; human; in vitro study; in vivo study; intratumoral drug administration; kinetics; male; microcapsule; mouse; mouse model; nonhuman; nuclear Overhauser effect; quality of life; radiotherapy; Raman spectrometry; *stereochemistry; stereoisomerism; therapy effect; water solubility; X irradiation; *X ray; lactic acid; *nanochain; *paclitaxel; polymer; water.

Drug Index Terms

lactic acid; *nanochain; *paclitaxel; polymer; water.

Other Index Terms

adult; animal experiment; animal model; cancer cell; *cancer combination chemotherapy; cancer inhibition; cancer survival; chemoradiotherapy; chemotherapy; circular dichroism; conference abstract; controlled drug release; controlled study; drug formulation; *drug solubility; head and neck squamous cell carcinoma; human; in vitro study; in vivo study; intratumoral drug administration; kinetics; male; microcapsule; mouse; mouse model; nonhuman; nuclear Overhauser effect; quality of life; radiotherapy; Raman spectrometry; *stereochemistry; stereoisomerism; therapy effect; water solubility; X irradiation; *X ray.

Link to the Ovid Full Text or citation:

[Click here for full text options](https://ovidsp.ovid.com/ovidweb.cgi?T=JS&CSC=Y&NEWS=N&PAGE=fulltext&D=emed23&AN=638678709)

Link to the External Link Resolver:

[SFX](https://sfx-86scu.hosted.exlibrisgroup.com.cn/86scu?sid=OVID:embase&id=pmid:&id=doi:10.1158%2F1538-7445.AM2022-304&issn=15387445&isbn=&volume=82&issue=12+Supplement&spage=304&pages=&date=2022&title=Cancer+Research&atitle=Effect+of+paclitaxel+stereochemistry+on+x-ray-triggered+release+of+paclitaxel+from+CaWO4%2Fpaclitaxel-coloaded+PEG-PLA+nanoparticles&aulast=Sarkar&pid=<author>Sarkar+K.%3BTorresgrossa-Allen+S.%3BLanger+M.P.%3BDurm+G.%3BNarayanan+S.%3BElzey+B.D.%3BWon+Y.-Y.<%2Fauthor><AN>638678709<%2FAN><DT>Conference+Abstract<%2FDT>)

51.

Establishment of a tissue processing workflow and analysis of the influence of formalin fixation and paraffin embedding on the spectral bioinformation of salivary gland tumors.

Till M., Elena G.-H., Mona S., Miriam B., Marc B., Rudolf H., Agmal S., Stephan H.

Laryngo- Rhino- Otologie. Conference: 93rd Annual Meeting of the German Society of Oto-Rhino-Laryngology, Head and Neck Surgery. Hanover Germany. 101(Supplement 2) (pp S196-S197), 2022. Date of Publication: May 2022.

AN: 638571801

Introduction The pre-, intra- and postoperative entity and dignity determination of salivary gland tumors (ST) solely based on histomorphological criteria is often associated with great uncertainties. The spectra of Raman spectroscopy (RS) and infrared spectroscopy (IS) contain information about the molecular composition of the investigated tissue. The aim of this study was the establishment of a tissue processing workflow and the analysis of the influence of formalin and paraffin fixation on the spectral bioinformation compared to cryofixation. In addition, an overview of the use of RS and IS in head and neck oncology is given. Material and methods 10 mum thick, consecutive sections from cryo-, formalin-, and paraffin-fixed cystadenolymphomas (n = 5) and pleomorphic adenomas (n = 4) were examined by the RS and IS and data were evaluated multivariately. The measurements were made in correlation to the histomorphology via a corresponding HE section both in the tumor tissue and in the healthy salivary gland tissue. Results The mean value spectrum analysis showed a clear paraffin signature, formalin fixation had no significant influence. This could be confirmed by the principal component analysis (PCA). A discrimination of tumor and non-tumor tissue by the PCA and coupled discriminant analysis was also possible with both spectroscopic methods, RS and IS, with a high sensitivity. Discussion For a translation of spectral processes, knowledge on factors influencing the spectral bioinformation of tissue preparation and fixation is essential. The additive integration of spectral methods into existing work processes is possible. The influence of formalin fixation on the spectral bioinformation is small. The bioinformatic analysis of the extensive data sets is challenging.

Institution

(Till, Rudolf, Agmal) Institutes Klinik und Poliklinik fur Hals-,Nasen- und Ohrenkrankheiten, plastische und asthetische Operationen, Universitatsklinikum Wurzburg, Wurzburg, Germany (Elena) Institut fur Pathologie, Wurzburg, Germany

(Mona, Miriam, Marc) Lehr- und Forschungszentrum Process Analysis and Technology PA and T, Hochschule Reutlingen Reutlingen, Germany

(Stephan) Klinik fur Hals-Nasen-Ohren-Heilkunde, Kopf- und Hals-Chirurgie, Uniklinik RWTH Aachen, Aachen, Germany

Publisher

Georg Thieme Verlag

Emtree Heading

clinical article; conference abstract; controlled study; discriminant analysis; histopathology; human; human tissue; infrared spectroscopy; male; neck; *paraffin embedding; pleomorphic adenoma; principal component analysis; Raman spectrometry; salivary gland; *salivary gland tumor; tissue preparation; *workflow; *formaldehyde; paraffin.

Drug Index Terms

*formaldehyde; paraffin.

Other Index Terms

clinical article; conference abstract; controlled study; discriminant analysis; histopathology; human; human tissue; infrared spectroscopy; male; neck; *paraffin embedding; pleomorphic adenoma; principal component analysis; Raman spectrometry; salivary gland; *salivary gland tumor; tissue preparation; *workflow.

Link to the Ovid Full Text or citation:

[Click here for full text options](https://ovidsp.ovid.com/ovidweb.cgi?T=JS&CSC=Y&NEWS=N&PAGE=fulltext&D=emed23&AN=638571801)

Link to the External Link Resolver:

[SFX](https://sfx-86scu.hosted.exlibrisgroup.com.cn/86scu?sid=OVID:embase&id=pmid:&id=doi:10.1055%2Fs-0042-1746596&issn=14388685&isbn=&volume=101&issue=Supplement+2&spage=S196&pages=S196-S197&date=2022&title=Laryngo-+Rhino-+Otologie&atitle=Establishment+of+a+tissue+processing+workflow+and+analysis+of+the+influence+of+formalin+fixation+and+paraffin+embedding+on+the+spectral+bioinformation+of+salivary+gland+tumors&aulast=Till&pid=<author>Till+M.%3BElena+G.-H.%3BMona+S.%3BMiriam+B.%3BMarc+B.%3BRudolf+H.%3BAgmal+S.%3BStephan+H.<%2Fauthor><AN>638571801<%2FAN><DT>Conference+Abstract<%2FDT>)

52.

Corrigendum: Diagnostic accuracy of Raman spectroscopy in oral squamous cell carcinoma(Front. Oncol., (2022), 12, (925032), 10.3389/fonc.2022.925032).

Han R., Lin N., Huang J., Ma X.

Frontiers in Oncology. 12 (no pagination), 2022. Article Number: 1030058. Date of Publication: 21 Sep 2022.

AN: 2019428814

In the published article, there was an error in affiliation 1. Instead of "State Key Laboratory of Oral Diseases, National Clinical Research Center for Oral Diseases, Sichuan University, Chengdu, China", it should be "Department of Biotherapy, West China Hospital and State Key Laboratory of Biotherapy, Sichuan University, Chengdu, China". In the published article, there was an error in affiliation 2. Instead of "Department of Biotherapy, West China Hospital and State Key Laboratory of Biotherapy, Sichuan University, Chengdu, China", it should be "State Key Laboratory of Oral Diseases, National Clinical Research Center for Oral Diseases, Sichuan University, Chengdu, China". In the published article, there was an error regarding the affiliation for Ruiying Han. As well as having affiliation 2, they should also have Department of Biotherapy, West China Hospital and State Key Laboratory of Biotherapy, Sichuan University, Chengdu, China. In the published article, there was an error. There was a mistake in the time range of the searched literature in Abstract. A correction has been made to Abstract, Methods, 1. This sentence previously stated: "We systematically searched databases including Medline, Embase, and Web of Science for studies up to March 2022 with no start date limited."The corrected sentence appears below: "We systematically searched databases including Medline, Embase, and Web of Science for studies from January 2000 to March 2022." The authors apologize for these errors and state that this does not change the scientific conclusions of the article in any way. The original article has been updated.

Copyright © 2022 Han, Lin, Huang and Ma.

Institution

(Han, Lin, Ma) Department of Biotherapy, West China Hospital and State Key Laboratory of Biotherapy, Sichuan University, Chengdu, China (Han) State Key Laboratory of Oral Diseases, National Clinical Research Center for Oral Diseases, Sichuan University, Chengdu, China

(Huang) Department of Hematology, Sichuan Academy of Medical Sciences, Sichuan Provincial People's Hospital, University of Electronic Science and Technology of China, Chengdu, China

Publisher

Frontiers Media S.A.

Emtree Heading

*erratum.

Other Index Terms

*erratum.

Link to the Ovid Full Text or citation:

[Click here for full text options](https://ovidsp.ovid.com/ovidweb.cgi?T=JS&CSC=Y&NEWS=N&PAGE=fulltext&D=emed23&AN=2019428814)

Link to the External Link Resolver:

[SFX](https://sfx-86scu.hosted.exlibrisgroup.com.cn/86scu?sid=OVID:embase&id=pmid:&id=doi:10.3389%2Ffonc.2022.1030058&issn=2234943X&isbn=&volume=12&issue=&spage=1030058&pages=&date=2022&title=Frontiers+in+Oncology&atitle=Corrigendum%3A+Diagnostic+accuracy+of+Raman+spectroscopy+in+oral+squamous+cell+carcinoma(Front.+Oncol.%2C+(2022)%2C+12%2C+(925032)%2C+10.3389%2Ffonc.2022.925032)&aulast=Han&pid=<author>Han+R.%3BLin+N.%3BHuang+J.%3BMa+X.<%2Fauthor><AN>2019428814<%2FAN><DT>Erratum<%2FDT>)

53.

Bioengineering the ameloblastoma tumour to study its effect on bone nodule formation.

Bakkalci D., Jay A., Rezaei A., Howard C.A., Haugen H.J., Pape J., Kishida S., Kishida M., Jell G., Arnett T.R., Fedele S., Cheema U.

Scientific reports. 11(1) (pp 24088), 2021. Date of Publication: 16 Dec 2021.

AN: 636916151

Ameloblastoma is a benign, epithelial cancer of the jawbone, which causes bone resorption and disfigurement to patients affected. The interaction of ameloblastoma with its tumour stroma drives invasion and progression. We used stiff collagen matrices to engineer active bone forming stroma, to probe the interaction of ameloblastoma with its native tumour bone microenvironment. This bone-stroma was assessed by nano-CT, transmission electron microscopy (TEM), Raman spectroscopy and gene analysis. Furthermore, we investigated gene correlation between bone forming 3D bone stroma and ameloblastoma introduced 3D bone stroma. Ameloblastoma cells increased expression of MMP-2 and -9 and RANK temporally in 3D compared to 2D. Our 3D biomimetic model formed bone nodules of an average surface area of 0.1 mm2 and average height of 92.37 [Formula: see text] 7.96 mum over 21 days. We demonstrate a woven bone phenotype with distinct mineral and matrix components and increased expression of bone formation genes in our engineered bone. Introducing ameloblastoma to the bone stroma, completely inhibited bone formation, in a spatially specific manner. Multivariate gene analysis showed that ameloblastoma cells downregulate bone formation genes such as RUNX2. Through the development of a comprehensive bone stroma, we show that an ameloblastoma tumour mass prevents osteoblasts from forming new bone nodules and severely restricted the growth of existing bone nodules. We have identified potential pathways for this inhibition. More critically, we present novel findings on the interaction of stromal osteoblasts with ameloblastoma.

Copyright © 2021. The Author(s).

PMID

34916549 [<https://www.ncbi.nlm.nih.gov/pubmed/?term=34916549>]

Institution

(Bakkalci, Pape, Cheema) UCL Centre of 3D Models Health and Disease, Division of Surgery and Interventional Sciences, University College London, Charles Bell House, London, United Kingdom (Jay) University College London Hospitals, London, United Kingdom

(Rezaei, Jell) Division of Surgery and Interventional Sciences, University College London, Royal Free Campus, London, United Kingdom

(Howard) Deparment of Physics & Astronomy, University College London, London, United Kingdom

(Haugen) Department of Biomaterial Institute for Clinical Dentistry, University of Oslo, Oslo, Norway

(Kishida, Kishida) Department of Biochemistry and Genetics, Graduate School of Medical and Dental Sciences, Kagoshima University, Kagoshima, Japan

(Arnett) Department of Cell and & Developmental Biology, University College London, London, United Kingdom

(Fedele) Eastman Dental Institute, University College London, London, United Kingdom

Publisher

NLM (Medline)

Emtree Heading

ameloblastoma/th [Therapy]; animal; *bone development; complication; etiology; gene expression; genetics; human; jaw tumor/th [Therapy]; metabolism; osteoblast; osteolysis; *pathophysiology; physiology; *procedures; rat; *stroma cell; tissue engineering; tumor cell culture; tumor invasion; tumor microenvironment; gelatinase A; osteoclast differentiation factor; transcription factor RUNX2; Runx2 protein, rat.

Candidate Terms

Runx2 protein, rat [drug term]

Drug Index Terms

gelatinase A; osteoclast differentiation factor; transcription factor RUNX2.

Other Index Terms

ameloblastoma / therapy; animal; *bone development; complication; etiology; gene expression; genetics; human; jaw tumor / therapy; metabolism; osteoblast; osteolysis; *pathophysiology; physiology; *procedures; rat; *stroma cell; tissue engineering; tumor cell culture; tumor invasion; tumor microenvironment.

Link to the Ovid Full Text or citation:

[Click here for full text options](https://ovidsp.ovid.com/ovidweb.cgi?T=JS&CSC=Y&NEWS=N&PAGE=fulltext&D=emed23&AN=636916151)

Link to the External Link Resolver:

[SFX](https://sfx-86scu.hosted.exlibrisgroup.com.cn/86scu?sid=OVID:embase&id=pmid:34916549&id=doi:10.1038%2Fs41598-021-03484-5&issn=20452322&isbn=&volume=11&issue=1&spage=24088&pages=24088&date=2021&title=Scientific+reports&atitle=Bioengineering+the+ameloblastoma+tumour+to+study+its+effect+on+bone+nodule+formation&aulast=Bakkalci&pid=<author>Bakkalci+D.%3BJay+A.%3BRezaei+A.%3BHoward+C.A.%3BHaugen+H.J.%3BPape+J.%3BKishida+S.%3BKishida+M.%3BJell+G.%3BArnett+T.R.%3BFedele+S.%3BCheema+U.<%2Fauthor><AN>636916151<%2FAN><DT>Article<%2FDT>)

54.

Tracking of the biochemical changes upon pleomorphic adenoma progression using vibrational microspectroscopy.

Paluszkiewicz C., Roman M., Piergies N., Pieta E., Wozniak M., Guidi M.C., Miskiewicz-Orczyk K., Markow M., Scierski W., Misiolek M., Drozdzowska B., Kwiatek W.M.

Scientific reports. 11(1) (pp 18010), 2021. Date of Publication: 09 Sep 2021.

AN: 636106069

Head and neck tumors can be very challenging to treat because of the risk of problems or complications after surgery. Therefore, prompt and accurate diagnosis is extremely important to drive appropriate treatment decisions, which may reduce the chance of recurrence. This paper presents the original research exploring the feasibility of Fourier transform infrared (FT-IR) and Raman spectroscopy (RS) methods to investigate biochemical alterations upon the development of the pleomorphic adenoma. Principal component analysis (PCA) was used for a detailed assessment of the observed changes and to determine the spectroscopic basis for salivary gland neoplastic pathogenesis. It is implied that within the healthy margin, as opposed to the tumoral tissue, there are parts that differ significantly in lipid content. This observation shed new light on the crucial role of lipids in tissue physiology and tumorigenesis. Thus, a novel approach that eliminates the influence of lipids on the elucidation of biochemical changes is proposed. The performed analysis suggests that the highly heterogeneous healthy margin contains more unsaturated triacylglycerols, while the tumoral section is rich in proteins. The difference in protein content was also observed for these two tissue types, i.e. the healthy tissue possesses more proteins in the anti-parallel beta-sheet conformation, whereas the tumoral tissue is dominated by proteins rich in unordered random coils. Furthermore, the pathogenic tissue shows a higher content of carbohydrates and reveals noticeable differences in nucleic acid content. Finally, FT-IR and Raman spectroscopy methods were proposed as very promising methods in the discrimination of tumoral and healthy tissues of the salivary gland.

Copyright © 2021. The Author(s).

PMID

34504182 [<https://www.ncbi.nlm.nih.gov/pubmed/?term=34504182>]

Author NameID

Paluszkiewicz, Czeslawa; ORCID: <https://orcid.org/0000-0003-0186-8090> Roman, Maciej; ORCID: <https://orcid.org/0000-0003-0921-426X>

Piergies, Natalia; ORCID: <https://orcid.org/0000-0003-4899-3534>

Pieta, Ewa; ORCID: <https://orcid.org/0000-0001-7071-0284>

Wozniak, Monika; ORCID: <https://orcid.org/0000-0002-3709-8318>

Kwiatek, Wojciech M.; ORCID: <https://orcid.org/0000-0002-2197-8572>

Guidi, Mariangela Cestelli; ORCID: <https://orcid.org/0000-0002-6884-3915>

Miskiewicz-Orczyk, Katarzyna; ORCID: <https://orcid.org/0000-0001-8088-3437>

Markow, Magdalena; ORCID: <https://orcid.org/0000-0002-1072-2125>

Scierski, Wojciech; ORCID: <https://orcid.org/0000-0003-3242-8047>

Misiolek, Maciej; ORCID: <https://orcid.org/0000-0002-8476-9153>

Drozdzowska, Bogna; ORCID: <https://orcid.org/0000-0002-2287-6842>

Institution

(Paluszkiewicz, Roman, Piergies, Pieta, Wozniak, Kwiatek) Institute of Nuclear Physics, Polish Academy of Sciences, Radzikowskiego 152, Krakow 31-342, Poland (Guidi) INFN-Laboratori Nazionali di Frascati, Via E. Fermi 40, Frascati 00044, Italy

(Miskiewicz-Orczyk, Markow, Scierski, Misiolek) Department of Otorhinolaryngology and Laryngological Oncology in Zabrze, Medical University of Silesia Katowice, Zabrze 41800, Poland

(Drozdzowska) Department of Pathomorphology Zabrze, Medical University of Silesia, Katowice, Poland

Publisher

NLM (Medline)

Emtree Heading

alpha helix; antibody specificity; beta sheet; carcinogenesis; chemistry; cytochemistry; female; human; information processing; infrared spectroscopy; male; metabolism; middle aged; pathology; pleomorphic adenoma/di [Diagnosis]; pleomorphic adenoma/su [Surgery]; principal component analysis; *procedures; Raman spectrometry; salivary gland tumor/di [Diagnosis]; salivary gland tumor/su [Surgery]; carbohydrate; eosin; hematoxylin; nucleic acid; triacylglycerol; tumor protein.

Drug Index Terms

carbohydrate; eosin; hematoxylin; nucleic acid; triacylglycerol; tumor protein.

Other Index Terms

alpha helix; antibody specificity; beta sheet; carcinogenesis; chemistry; cytochemistry; female; human; information processing; infrared spectroscopy; male; metabolism; middle aged; pathology; pleomorphic adenoma / diagnosis / surgery; principal component analysis; *procedures; Raman spectrometry; salivary gland tumor / diagnosis / surgery.

Link to the Ovid Full Text or citation:

[Click here for full text options](https://ovidsp.ovid.com/ovidweb.cgi?T=JS&CSC=Y&NEWS=N&PAGE=fulltext&D=emed23&AN=636106069)

Link to the External Link Resolver:

[SFX](https://sfx-86scu.hosted.exlibrisgroup.com.cn/86scu?sid=OVID:embase&id=pmid:34504182&id=doi:10.1038%2Fs41598-021-97377-2&issn=20452322&isbn=&volume=11&issue=1&spage=18010&pages=18010&date=2021&title=Scientific+reports&atitle=Tracking+of+the+biochemical+changes+upon+pleomorphic+adenoma+progression+using+vibrational+microspectroscopy&aulast=Paluszkiewicz&pid=<author>Paluszkiewicz+C.%3BRoman+M.%3BPiergies+N.%3BPieta+E.%3BWozniak+M.%3BGuidi+M.C.%3BMiskiewicz-Orczyk+K.%3BMarkow+M.%3BScierski+W.%3BMisiolek+M.%3BDrozdzowska+B.%3BKwiatek+W.M.<%2Fauthor><AN>636106069<%2FAN><DT>Article<%2FDT>)

55.

Geometrically encoded SERS nanobarcodes for the logical detection of nasopharyngeal carcinoma-related progression biomarkers.

Lin D., Hsieh C.-L., Hsu K.-C., Liao P.-H., Qiu S., Gong T., Yong K.-T., Feng S., Kong K.V.

Nature Communications. 12(1) (no pagination), 2021. Article Number: 3430. Date of Publication: 01 Dec 2021.

AN: 2012308289

The limited availability of nasopharyngeal carcinoma-related progression biomarker array kits that offer physicians comprehensive information is disadvantageous for monitoring cancer progression. To develop a biomarker array kit, systematic identification and differentiation of a large number of distinct molecular surface-enhanced Raman scattering (SERS) reporters with high spectral temporal resolution is a major challenge. To address this unmet need, we use the chemistry of metal carbonyls to construct a series of unique SERS reporters with the potential to provide logical and highly multiplex information during testing. In this study, we report that geometric control over metal carbonyls on nanotags can produce 14 distinct barcodes that can be decoded unambiguously using commercial Raman spectroscopy. These metal carbonyl nanobarcodes are tested on human blood samples and show strong sensitivity (0.07 ng/mL limit of detection, average CV of 6.1% and >92% degree of recovery) and multiplexing capabilities for MMPs.

Copyright © 2021, The Author(s).

PMID

34078895 [<https://www.ncbi.nlm.nih.gov/pubmed/?term=34078895>]

Author NameID

Lin, Duo; ORCID: <https://orcid.org/0000-0001-6959-5995> Gong, Tianxun; ORCID: <https://orcid.org/0000-0001-9383-3666>

Institution

(Lin, Feng) Key Laboratory of OptoElectronic Science and Technology for Medicine, Ministry of Education, Fujian Provincial Key Laboratory for Photonics Technology, Fujian Normal University, Fuzhou, Fujian, China (Hsieh, Hsu, Liao, Kong) Department of Chemistry, National Taiwan University, Taipei, Taiwan (Republic of China)

(Qiu) Fujian Medical University Cancer Hospital, Fujian Cancer Hospital, Fuzhou, Fujian, China

(Gong) State Key Laboratory of Electronic Thin Films and Integrated Devices, School of Electronic Science and Engineering (National Exemplary School of Microelectronics), University of Electronic Science and Technology of China, Chengdu, China

(Yong) School of Biomedical Engineering, The University of Sydney, Sydney, NSW, Australia

(Yong) The University of Sydney Nano Institute, The University of Sydney, Sydney, NSW, Australia

Publisher

Nature Research

Emtree Heading

article; blood sampling; cancer growth; electromagnetic radiation; Epstein Barr virus infection; genetic susceptibility; human; information science; limit of detection; metastasis; *nasopharynx carcinoma; polarization; protein degradation; protein expression; *surface enhanced Raman spectroscopy; synthesis; tumor invasion; avidin; biological marker/ec [Endogenous Compound]; biotin; *carbonyl derivative; collagen type 10/ec [Endogenous Compound]; collagen type 11/ec [Endogenous Compound]; collagen type 4/ec [Endogenous Compound]; collagen type 9/ec [Endogenous Compound]; cysteine/ec [Endogenous Compound]; gelatin; gelatinase A/ec [Endogenous Compound]; gelatinase B/ec [Endogenous Compound]; gold nanoparticle; interstitial collagenase/ec [Endogenous Compound]; iodine; matrilysin/ec [Endogenous Compound]; matrix metalloproteinase/ec [Endogenous Compound]; molybdenum; *nanogel; rhenium; ruthenium; stromelysin/ec [Endogenous Compound]; thiol group/ec [Endogenous Compound]; *transition element; tungsten.

Drug Index Terms

avidin; biological marker / endogenous compound; biotin; *carbonyl derivative; collagen type 10 / endogenous compound; collagen type 11 / endogenous compound; collagen type 4 / endogenous compound; collagen type 9 / endogenous compound; cysteine / endogenous compound; gelatin; gelatinase A / endogenous compound; gelatinase B / endogenous compound; gold nanoparticle; interstitial collagenase / endogenous compound; iodine; matrilysin / endogenous compound; matrix metalloproteinase / endogenous compound; molybdenum; *nanogel; rhenium; ruthenium; stromelysin / endogenous compound; thiol group / endogenous compound; *transition element; tungsten.

Other Index Terms

Article; blood sampling; cancer growth; electromagnetic radiation; Epstein Barr virus infection; genetic susceptibility; human; information science; limit of detection; metastasis; *nasopharynx carcinoma; polarization; protein degradation; protein expression; *surface enhanced Raman spectroscopy; synthesis; tumor invasion.

Link to the Ovid Full Text or citation:

[Click here for full text options](https://ovidsp.ovid.com/ovidweb.cgi?T=JS&CSC=Y&NEWS=N&PAGE=fulltext&D=emed23&AN=2012308289)

Link to the External Link Resolver:

[SFX](https://sfx-86scu.hosted.exlibrisgroup.com.cn/86scu?sid=OVID:embase&id=pmid:34078895&id=doi:10.1038%2Fs41467-021-23789-3&issn=20411723&isbn=&volume=12&issue=1&spage=3430&pages=&date=2021&title=Nature+Communications&atitle=Geometrically+encoded+SERS+nanobarcodes+for+the+logical+detection+of+nasopharyngeal+carcinoma-related+progression+biomarkers&aulast=Lin&pid=<author>Lin+D.%3BHsieh+C.-L.%3BHsu+K.-C.%3BLiao+P.-H.%3BQiu+S.%3BGong+T.%3BYong+K.-T.%3BFeng+S.%3BKong+K.V.<%2Fauthor><AN>2012308289<%2FAN><DT>Article<%2FDT>)

56.

Brachytherapy approach using177 Lu conjugated gold nanostars and evaluation of biodistribution, tumor retention, dosimetry and therapeutic efficacy in head and neck tumor model.

Lin M.-Y., Hsieh H.-H., Chen J.-C., Chen C.-L., Sheu N.-C., Huang W.-S., Ho S.-Y., Chen T.-W., Lee Y.-J., Wu C.-Y.

Pharmaceutics. 13(11) (no pagination), 2021. Article Number: 1903. Date of Publication: November 2021.

AN: 2014592910

Brachytherapy can provide sufficient doses to head and neck squamous cell carcinoma (HNSCC) with minimal damage to nearby normal tissues. In this study, the beta--emitter177 Lu was conjugated to DTPA-polyethylene glycol (PEG) decorated gold nanostars (177 Lu-DTPA-pAuNS) used in surface-enhanced Raman scattering and photothermal therapy (PTT). The accumulation and therapeutic efficacy of177 Lu-DTPA-pAuNS were compared with those of177 Lu-DTPA on an orthotopic HNSCC tumor model. The SPECT/CT imaging and biodistribution studies showed that177 Lu-DTPA-pAuNS can be accumulated in the tumor up to 15 days, but177 Lu-DTPA could not be detected at 24 h after injection. The tumor viability and growth were suppressed by injected177 Lu-DTPA-pAuNS but not nonconjugated177 Lu-DTPA, as evaluated by bioluminescent imaging. The radiation-absorbed dose of the normal organ was the highest in the liver (0.33 mSv/MBq) estimated in a 73 kg adult, but that of tumorsphere (0.5 g) was 3.55 mGy/MBq, while intravenous injection of177 Lu-DTPA-pAuNS resulted in 1.97 mSv/MBq and 0.13 mGy/MBq for liver and tumorsphere, respectively. We also observed further enhancement of tumor-suppressive effects by a combination of177 Lu-DTPA-pAuNS and PTT compared to177 Lu-DTPA-pAuNS alone. In conclusion,177 Lu-DTPA-pAuNS may be considered as a potential radiopharmaceutical agent for HNSCC brachytherapy.

Copyright © 2021 by the authors. Licensee MDPI, Basel, Switzerland.

Institution

(Lin, Hsieh, Chen, Chen, Sheu, Lee, Wu) Department of Biomedical Imaging and Radiological Sciences, National Yang Ming Chiao Tung University, Taipei Branch, Taipei 112, Taiwan (Republic of China) (Huang) Department of Nuclear Medicine, Taipei Medical University Hospital, Taipei 11031, Taiwan (Republic of China)

(Ho, Chen) Institute of Bioinformatics and Systems Biology, National Yang Ming Chiao Tung University, Hsinchu Branch, Hsinchu 30068, Taiwan (Republic of China)

(Chen) Department of Biological Science and Technology, National Yang Ming Chiao Tung University, Hsinchu Branch, Hsinchu 30068, Taiwan (Republic of China)

(Lee) Cancer Progression Research Center, National Yang Ming Chiao Tung University, Taipei Branch, Taipei 112, Taiwan (Republic of China)

Publisher

MDPI

Emtree Heading

animal experiment; animal model; animal tissue; article; *brachytherapy; *clinical effectiveness; concentration response; controlled study; *dosimetry; *drug distribution; *drug retention; *head and neck squamous cell carcinoma/dt [Drug Therapy]; *head and neck squamous cell carcinoma/th [Therapy]; human; human cell; mouse; nonhuman; photothermal therapy; radiation absorption; radiation dose distribution; single photon emission computed tomography-computed tomography; staining; surface enhanced Raman spectroscopy; theranostic nanomedicine; treatment outcome; treatment response; *gold nanoparticle; *lutetium 177/dt [Drug Therapy]; *lutetium 177/tu [Intratumoral Drug Administration]; *lutetium 177/iv [Intravenous Drug Administration]; *lutetium 177/pk [Pharmacokinetics]; macrogol; *nanostar; pentetic acid.

Drug Index Terms

*gold nanoparticle; *lutetium 177 / *drug therapy / *intratumoral drug administration / *intravenous drug administration / *pharmacokinetics; macrogol; *nanostar; pentetic acid.

Other Index Terms

animal experiment; animal model; animal tissue; Article; *brachytherapy; *clinical effectiveness; concentration response; controlled study; *dosimetry; *drug distribution; *drug retention; *head and neck squamous cell carcinoma / *drug therapy / *therapy; human; human cell; mouse; nonhuman; photothermal therapy; radiation absorption; radiation dose distribution; single photon emission computed tomography-computed tomography; staining; surface enhanced Raman spectroscopy; theranostic nanomedicine; treatment outcome; treatment response.

Link to the Ovid Full Text or citation:

[Click here for full text options](https://ovidsp.ovid.com/ovidweb.cgi?T=JS&CSC=Y&NEWS=N&PAGE=fulltext&D=emed23&AN=2014592910)

Link to the External Link Resolver:

[SFX](https://sfx-86scu.hosted.exlibrisgroup.com.cn/86scu?sid=OVID:embase&id=pmid:&id=doi:10.3390%2Fpharmaceutics13111903&issn=19994923&isbn=&volume=13&issue=11&spage=1903&pages=&date=2021&title=Pharmaceutics&atitle=Brachytherapy+approach+using177+Lu+conjugated+gold+nanostars+and+evaluation+of+biodistribution%2C+tumor+retention%2C+dosimetry+and+therapeutic+efficacy+in+head+and+neck+tumor+model&aulast=Lin&pid=<author>Lin+M.-Y.%3BHsieh+H.-H.%3BChen+J.-C.%3BChen+C.-L.%3BSheu+N.-C.%3BHuang+W.-S.%3BHo+S.-Y.%3BChen+T.-W.%3BLee+Y.-J.%3BWu+C.-Y.<%2Fauthor><AN>2014592910<%2FAN><DT>Article<%2FDT>)

57.

Pilot study on the value of Raman spectroscopy in the entity assignment of salivary gland tumors.

Meyer T.J., Gerhard-Hartmann E., Lodes N., Scherzad A., Hagen R., Steinke M., Hackenberg S.

PLoS ONE. 16(9 September) (no pagination), 2021. Article Number: e0257470. Date of Publication: September 2021.

AN: 2014640311

Background The entity assignment of salivary gland tumors (SGT) based on histomorphology can be challenging. Raman spectroscopy has been applied to analyze differences in the molecular composition of tissues. The aim of this study was to evaluate the suitability of RS for entity assignment in SGT. Methods Raman data were collected in deparaffinized sections of pleomorphic adenomas (PA) and adenoid cystic carcinomas (ACC). Multivariate data and chemometric analysis were completed using the Unscrambler software. Results The Raman spectra detected in ACC samples were mostly assigned to nucleic acids, lipids, and amides. In a principal component-based linear discriminant analysis (LDA) 18 of 20 tumor samples were classified correctly. Conclusion In this proof of concept study, we show that a reliable SGT diagnosis based on LDA algorithm appears possible, despite variations in the entity-specific mean spectra. However, a standardized workflow for tissue sample preparation, measurement setup, and chemometric algorithms is essential to get reliable results.

Copyright © 2021 Meyer et al. This is an open access article distributed under the terms of the Creative Commons Attribution License, which permits unrestricted use, distribution, and reproduction in any medium, provided the original author and source are credited.

PMID

34529739 [<https://www.ncbi.nlm.nih.gov/pubmed/?term=34529739>]

Institution

(Meyer, Scherzad, Hagen, Hackenberg) Department of Oto-Rhino-Laryngology, Plastic, Aesthetic and Reconstructive Head and Neck Surgery, University Hospital Wurzburg, Wurzburg, Germany (Gerhard-Hartmann) Institute of Pathology, University of Wurzburg, Wurzburg, Germany

(Lodes, Steinke) Chair of Tissue Engineering and Regenerative Medicine, University Hospital Wurzburg, Wurzburg, Germany

(Steinke) Fraunhofer Institute for Silicate Research ISC, Wurzburg, Germany

(Hackenberg) Department of Otorhinolaryngology - Head and Neck Surgery, RWTH Aachen University Hospital, Aachen, Germany

Publisher

Public Library of Science

Emtree Heading

adenoid cystic carcinoma; adult; aged; article; cell heterogeneity; cell infiltration; cell nucleus; chemometric analysis; cholangiocyte; clinical article; cytoplasm; discriminant analysis; extracellular matrix; female; fluorescence microscopy; histopathology; human; human tissue; male; mesenchymal stroma cell; myoepithelium cell; parotid gland slice; perineural invasion; pilot study; pleomorphic adenoma; predictive value; principal component analysis; *Raman spectrometry; *salivary gland tumor; tumor diagnosis; very elderly; amide/ec [Endogenous Compound]; carbohydrate/ec [Endogenous Compound]; collagen/ec [Endogenous Compound]; eosin; formaldehyde; glucose/ec [Endogenous Compound]; glycogen/ec [Endogenous Compound]; hematoxylin; lipid/ec [Endogenous Compound]; nucleic acid/ec [Endogenous Compound]; phenylalanine/ec [Endogenous Compound]; protein/ec [Endogenous Compound]; RNA/ec [Endogenous Compound]; confocal microscope; digital microscope; diode laser; fluorescence microscope; BioRam; BIOREVO BZ-9000.

Candidate Terms

BioRam [device term] BIOREVO BZ 9000 [device term]

Device Index Terms

confocal microscope; digital microscope; diode laser; fluorescence microscope.

Drug Index Terms

amide / endogenous compound; carbohydrate / endogenous compound; collagen / endogenous compound; eosin; formaldehyde; glucose / endogenous compound; glycogen / endogenous compound; hematoxylin; lipid / endogenous compound; nucleic acid / endogenous compound; phenylalanine / endogenous compound; protein / endogenous compound; RNA / endogenous compound.

Other Index Terms

adenoid cystic carcinoma; adult; aged; Article; cell heterogeneity; cell infiltration; cell nucleus; chemometric analysis; cholangiocyte; clinical article; cytoplasm; discriminant analysis; extracellular matrix; female; fluorescence microscopy; histopathology; human; human tissue; male; mesenchymal stroma cell; myoepithelium cell; parotid gland slice; perineural invasion; pilot study; pleomorphic adenoma; predictive value; principal component analysis; *Raman spectrometry; *salivary gland tumor; tumor diagnosis; very elderly.

Link to the Ovid Full Text or citation:

[Click here for full text options](https://ovidsp.ovid.com/ovidweb.cgi?T=JS&CSC=Y&NEWS=N&PAGE=fulltext&D=emed23&AN=2014640311)

Link to the External Link Resolver:

[SFX](https://sfx-86scu.hosted.exlibrisgroup.com.cn/86scu?sid=OVID:embase&id=pmid:34529739&id=doi:10.1371%2Fjournal.pone.0257470&issn=19326203&isbn=&volume=16&issue=9+September&spage=e0257470&pages=&date=2021&title=PLoS+ONE&atitle=Pilot+study+on+the+value+of+Raman+spectroscopy+in+the+entity+assignment+of+salivary+gland+tumors&aulast=Meyer&pid=<author>Meyer+T.J.%3BGerhard-Hartmann+E.%3BLodes+N.%3BScherzad+A.%3BHagen+R.%3BSteinke+M.%3BHackenberg+S.<%2Fauthor><AN>2014640311<%2FAN><DT>Article<%2FDT>)

58.

N-rich porous carbon catalysts with huge surface areas from bean curd activated by K2CO3.

Yi C., Zhang L., Xiang G., Chen X., Cheng N., Liu Z.

New Journal of Chemistry. 45(36) (pp 16469-16476), 2021. Date of Publication: 28 Sep 2021.

AN: 636014442

Nitrogen-doped carbon materials with hierarchical porous structures have attracted huge attention in the field of catalysis owing to their special structures and properties in past few decades. In this study, a series of metal-free and N-rich porous carbon catalysts (NPCs) were synthesized by a one-step activation-pyrolysis process. The catalytic performance of NPCs obtained from using bean curd as the carbon and nitrogen precursors and activatedviapyrolysis in a nitrogen atmosphere with different amounts of K2CO3was investigated for the selective oxidation of ethylbenzene. The catalysts were characterized using a series of techniques, such as N2adsorption-desorption isotherms, Raman spectroscopy, TEM, SEM, and XPS. The results presented that the as-prepared samples have specific surface areas as high as 1459 m2g-1. Furthermore, NPC-10 displayed the optimal catalytic performance among the catalysts. The ethylbenzene conversion of 96.2% over NPC-10 with a selectivity to acetophenone of 97.0% is even comparable to the results of some metal-doped catalysts, which may be attributed to the hierarchical porous structures and plenty of C-NXactive sites. This work provides a facile and novel strategy for the construction of metal-free and N-rich carbon materials with excellent catalytic activity for the selective oxidation of ethylbenzene.

Copyright © The Royal Society of Chemistry and the Centre National de la Recherche Scientifique 2021.

Institution

(Yi, Zhang, Xiang, Chen, Cheng, Liu) Advanced Catalytic Engineering Research Center of the Ministry of Education, College of Chemistry and Chemical Engineering, Hunan University, Hunan, Changsha 410082, China

Publisher

Royal Society of Chemistry

Emtree Heading

adsorption; article; Brunauer Emmett Teller method; catalysis; catalyst; desorption; oxidation; performance; pyrolysis; Raman spectrometry; surface area; *tofu; transmission electron microscopy; X ray diffraction; acetophenone; *carbon; ethylbenzene; nitrogen.

Drug Index Terms

acetophenone; *carbon; ethylbenzene; nitrogen.

Other Index Terms

adsorption; Article; Brunauer Emmett Teller method; catalysis; catalyst; desorption; oxidation; performance; pyrolysis; Raman spectrometry; surface area; *tofu; transmission electron microscopy; X ray diffraction.

Link to the Ovid Full Text or citation:

[Click here for full text options](https://ovidsp.ovid.com/ovidweb.cgi?T=JS&CSC=Y&NEWS=N&PAGE=fulltext&D=emed22&AN=636014442)

Link to the External Link Resolver:

[SFX](https://sfx-86scu.hosted.exlibrisgroup.com.cn/86scu?sid=OVID:embase&id=pmid:&id=doi:10.1039%2Fd1nj02548a&issn=11440546&isbn=&volume=45&issue=36&spage=16469&pages=16469-16476&date=2021&title=New+Journal+of+Chemistry&atitle=N-rich+porous+carbon+catalysts+with+huge+surface+areas+from+bean+curd+activated+by+K2CO3&aulast=Yi&pid=<author>Yi+C.%3BZhang+L.%3BXiang+G.%3BChen+X.%3BCheng+N.%3BLiu+Z.<%2Fauthor><AN>636014442<%2FAN><DT>Article<%2FDT>)

59.

Novel amorphous solid dispersion based on natural deep eutectic solvent for enhancing delivery of anti-tumor RA-XII by oral administration in rats.

Liu M., Lai Z., Zhu L., Ding X., Tong X., Wang Z., Bi Q., Tan N.

European Journal of Pharmaceutical Sciences. 166 (no pagination), 2021. Article Number: 105931. Date of Publication: 01 Nov 2021.

AN: 2014001927

At present, oral chemotherapy showing the advantages of non-invasiveness, convenience, and high patient compliance, is gradually replacing traditional intravenous chemotherapy to treat patients with cancer. RA-XII, a unique natural cyclopeptide, exhibits various biological activities, such as anti-tumor, anti-angiogenic, and anti-metastatic activities. Designing an orally available formulation of RA-XII is of great importance in the development of clinically useful anticancer agents. However, RA-XII shows low oral bioavailability in rats due to its poor solubility and low permeability. To overcome these limitations, in this work, a natural deep eutectic solvent (NADES) was designed to efficiently deliver RA-XII by oral administration. A novel NADES composed of betaine and mandelic acid in the molar ratio of 1:1 (Bet-Man NADES) was successfully prepared based on a binary phase diagram of Bet and Man. Acute toxicity studies indicated that Bet-Man NADES was well tolerated with acceptable toxicity. In Bet-Man NADES solutions, the solubility of RA-XII was increased by up to 17.54-fold, and the diffusion and permeability of RA-XII carried out in a Franz cell was also significantly improved 10.35 times. In terms of biopharmaceutical classification this is translated into a change for RA-XII from class IV to class II systems. More importantly, Bet-Man NADES was transferred into the solid formulation by the inclusion of a polymer, and amorphous solid dispersions based on Bet-Man NADES (PVP K30/NADES/RA-XII, ASDs) were successfully prepared to improve uniformity, apparent solubility, dissolution, and cytotoxicity in vitro. Consequently, the oral bioavailability of RA-XII in NADES solutions and ASDs was enhanced by approximately 11.58 and 7.56 times compared with that of pure RA-XII in 0.5% CMC[sbnd]Na. Thus, it can be seen that a natural deep eutectic solvent and its modified amorphous solid dispersions are appropriate novel strategies for improving dissolution rate and bioavailability of poor soluble natural products such as RA-XII.

Copyright © 2021

PMID

34256100 [<https://www.ncbi.nlm.nih.gov/pubmed/?term=34256100>]

Institution

(Liu, Lai, Zhu, Ding, Tong, Wang, Bi, Tan) Department of TCMs Pharmaceuticals, School of Traditional Chinese Pharmacy, China Pharmaceutical University, Nanjing 211198, China

Publisher

Elsevier B.V.

Emtree Heading

acute toxicity; animal experiment; animal tissue; *antineoplastic activity; apparent permeability; area under the curve; article; carbon nuclear magnetic resonance; controlled study; differential scanning calorimetry; *dispersion; drug bioavailability; drug cytotoxicity; *drug delivery system; drug diffusion; drug formulation; drug half life; drug penetration; drug solubility; enterohepatic circulation; eutectic point; female; Fourier transform infrared spectroscopy; human; human cell; in vitro study; in vivo study; male; maximum plasma concentration; mean residence time; mouse; nonhuman; oral absorption; plasma concentration-time curve; polarization microscopy; proton nuclear magnetic resonance; Raman spectrometry; rat; scanning electron microscopy; time to maximum plasma concentration; toxicity testing; water solubility; X ray powder diffraction; *antineoplastic agent/po [Oral Drug Administration]; *antineoplastic agent/pr [Pharmaceutics]; *antineoplastic agent/pk [Pharmacokinetics]; betaine; *deep eutectic solvent/to [Drug Toxicity]; mandelic acid; *natural product/pr [Pharmaceutics]; *natural product/pk [Pharmacokinetics]; polymer; solubilizer; unclassified drug; calorimeter; nuclear magnetic resonance spectrometer; polarization microscope; scanning electron microscope; spectrophotometer; X-ray diffractometer; *ra xii/po [Oral Drug Administration]; *ra xii/pr [Pharmaceutics]; *ra xii/pk [Pharmacokinetics].

Candidate Terms

*ra xii / *oral drug administration / *pharmaceutics / *pharmacokinetics [drug term]

Device Index Terms

calorimeter; nuclear magnetic resonance spectrometer; polarization microscope; scanning electron microscope; spectrophotometer; X-ray diffractometer.

Drug Index Terms

*antineoplastic agent / *oral drug administration / *pharmaceutics / *pharmacokinetics; betaine; *deep eutectic solvent / *drug toxicity; mandelic acid; *natural product / *pharmaceutics / *pharmacokinetics; polymer; solubilizer; unclassified drug.

Other Index Terms

acute toxicity; animal experiment; animal tissue; *antineoplastic activity; apparent permeability; area under the curve; Article; carbon nuclear magnetic resonance; controlled study; differential scanning calorimetry; *dispersion; drug bioavailability; drug cytotoxicity; *drug delivery system; drug diffusion; drug formulation; drug half life; drug penetration; drug solubility; enterohepatic circulation; eutectic point; female; Fourier transform infrared spectroscopy; human; human cell; in vitro study; in vivo study; male; maximum plasma concentration; mean residence time; mouse; nonhuman; oral absorption; plasma concentration-time curve; polarization microscopy; proton nuclear magnetic resonance; Raman spectrometry; rat; scanning electron microscopy; time to maximum plasma concentration; toxicity testing; water solubility; X ray powder diffraction.

Drug Trade Name

ra xii

Link to the Ovid Full Text or citation:

[Click here for full text options](https://ovidsp.ovid.com/ovidweb.cgi?T=JS&CSC=Y&NEWS=N&PAGE=fulltext&D=emed22&AN=2014001927)

Link to the External Link Resolver:

[SFX](https://sfx-86scu.hosted.exlibrisgroup.com.cn/86scu?sid=OVID:embase&id=pmid:34256100&id=doi:10.1016%2Fj.ejps.2021.105931&issn=09280987&isbn=&volume=166&issue=&spage=105931&pages=&date=2021&title=European+Journal+of+Pharmaceutical+Sciences&atitle=Novel+amorphous+solid+dispersion+based+on+natural+deep+eutectic+solvent+for+enhancing+delivery+of+anti-tumor+RA-XII+by+oral+administration+in+rats&aulast=Liu&pid=<author>Liu+M.%3BLai+Z.%3BZhu+L.%3BDing+X.%3BTong+X.%3BWang+Z.%3BBi+Q.%3BTan+N.<%2Fauthor><AN>2014001927<%2FAN><DT>Article<%2FDT>)

60.

Nanoparticles in dentistry: A comprehensive review.

Moraes G., Zambom C., Siqueira W.L.

Pharmaceuticals. 14(8) (no pagination), 2021. Article Number: 752. Date of Publication: August 2021.

AN: 2013305229

In recent years, nanoparticles (NPs) have been receiving more attention in dentistry. Their advantageous physicochemical and biological properties can improve the diagnosis, prevention, and treatment of numerous oral diseases, including dental caries, periodontal diseases, pulp and periapical lesions, oral candidiasis, denture stomatitis, hyposalivation, and head, neck, and oral cancer. NPs can also enhance the mechanical and microbiological properties of dental prostheses and implants and can be used to improve drug delivery through the oral mucosa. This paper reviewed studies from 2015 to 2020 and summarized the potential applications of different types of NPs in the many fields of dentistry.

Copyright © 2021 by the authors. Licensee MDPI, Basel, Switzerland.

Institution

(Moraes, Siqueira) College of Dentistry, University of Saskatchewan, Saskatoon, SK S7N 5E4, Canada (Moraes) Department of Dentistry, State University of Ponta Grossa, Ponta Grossa 84030-900, Brazil

(Zambom) Department of Biochemistry and Organic Chemistry, Institute of Chemistry, UNESP-Sao Paulo State University, Araraquara 14800-060, Brazil

Publisher

MDPI

Emtree Heading

bacterial colonization; bactericidal activity; biocompatibility; biodegradability; cell proliferation; cytotoxicity; *dental caries; *dentistry; early diagnosis; genotoxicity; head and neck cancer; human; hydrophilicity; hyposalivation; longevity; mineralization; mouth cancer; *nanotechnology; optical coherence tomography; osseointegration; periimplantitis/di [Diagnosis]; periodontal disease/di [Diagnosis]; physical chemistry; prevalence; review; stomatitis/di [Diagnosis]; surface enhanced Raman spectroscopy; tensile strength; thrush/di [Diagnosis]; calcium fluoride; *nanoparticle; poly(methyl methacrylate); titanium dioxide; zirconium oxide; immunosensor.

Device Index Terms

immunosensor.

Drug Index Terms

calcium fluoride; *nanoparticle; poly(methyl methacrylate); titanium dioxide; zirconium oxide.

Other Index Terms

bacterial colonization; bactericidal activity; biocompatibility; biodegradability; cell proliferation; cytotoxicity; *dental caries; *dentistry; early diagnosis; genotoxicity; head and neck cancer; human; hydrophilicity; hyposalivation; longevity; mineralization; mouth cancer; *nanotechnology; optical coherence tomography; osseointegration; periimplantitis / diagnosis; periodontal disease / diagnosis; physical chemistry; prevalence; Review; stomatitis / diagnosis; surface enhanced Raman spectroscopy; tensile strength; thrush / diagnosis.

Link to the Ovid Full Text or citation:

[Click here for full text options](https://ovidsp.ovid.com/ovidweb.cgi?T=JS&CSC=Y&NEWS=N&PAGE=fulltext&D=emed22&AN=2013305229)

Link to the External Link Resolver:

[SFX](https://sfx-86scu.hosted.exlibrisgroup.com.cn/86scu?sid=OVID:embase&id=pmid:&id=doi:10.3390%2Fph14080752&issn=14248247&isbn=&volume=14&issue=8&spage=752&pages=&date=2021&title=Pharmaceuticals&atitle=Nanoparticles+in+dentistry%3A+A+comprehensive+review&aulast=Moraes&pid=<author>Moraes+G.%3BZambom+C.%3BSiqueira+W.L.<%2Fauthor><AN>2013305229<%2FAN><DT>Review<%2FDT>)

61.

Raman spectral cytopathology for cancer diagnostic applications.

Traynor D., Behl I., O'Dea D., Bonnier F., Nicholson S., O'Connell F., Maguire A., Flint S., Galvin S., Healy C.M., Martin C.M., O'Leary J.J., Malkin A., Byrne H.J., Lyng F.M.

Nature Protocols. 16(7) (pp 3716-3735), 2021. Date of Publication: July 2021.

AN: 2012386363

Raman spectroscopy can provide a rapid, label-free, nondestructive measurement of the chemical fingerprint of a sample and has shown potential for cancer screening and diagnosis. Here we report a protocol for Raman microspectroscopic analysis of different exfoliative cytology samples (cervical, oral and lung), covering sample preparation, spectral acquisition, preprocessing and data analysis. The protocol takes 2 h 20 min for sample preparation, measurement and data preprocessing and up to 8 h for a complete analysis. A key feature of the protocol is that it uses the same sample preparation procedure as commonly used in diagnostic cytology laboratories (i.e., liquid-based cytology on glass slides), ensuring compatibility with clinical workflows. Our protocol also covers methods to correct for the spectral contribution of glass and sample pretreatment methods to remove contaminants (such as blood and mucus) that can obscure spectral features in the exfoliated cells and lead to variability. The protocol establishes a standardized clinical routine allowing the collection of highly reproducible data for Raman spectral cytopathology for cancer diagnostic applications for cervical and lung cancer and for monitoring suspicious lesions for oral cancer.

Copyright © 2021, The Author(s), under exclusive licence to Springer Nature Limited.

PMID

34117476 [<https://www.ncbi.nlm.nih.gov/pubmed/?term=34117476>]

Author NameID

Lyng, Fiona M.; ORCID: <https://orcid.org/0000-0002-9876-963X>

Institution

(Traynor, Behl, O'Dea, Lyng) Centre for Radiation and Environmental Science, FOCAS Research Institute, Technological University Dublin, Dublin, Ireland (Traynor, Behl, Lyng) School of Physics & Clinical & Optometric Sciences, Technological University Dublin, Dublin, Ireland

(O'Dea, Malkin) School of Biological and Health Sciences, Technological University Dublin, Dublin, Ireland

(Bonnier) EA 6295 Nanomedicaments et Nanosondes, Universite de Tours, Tours, France

(Nicholson, O'Connell, Maguire) St James's Hospital, Dublin, Ireland

(Flint, Galvin, Healy) Oral Medicine Unit, Dublin Dental University Hospital, Trinity College, Dublin, Ireland

(Martin, O'Leary) Discipline of Histopathology, University of Dublin Trinity College, Dublin, Ireland

(Martin, O'Leary) Emer Casey Molecular Pathology Research Laboratory, The Coombe Women and Infants University Hospital, Dublin, Ireland

(Martin, O'Leary, Lyng) CERVIVA Research Consortium, Dublin, Ireland

(Byrne) FOCAS Research Institute, Technological University Dublin, Dublin, Ireland

Publisher

Nature Research

Emtree Heading

bronchoscopy; cancer screening; cancer staging; cytology; *cytopathology; data analysis; discriminant analysis; dizziness; eye irritation; fine needle aspiration biopsy; human; lung cancer; *malignant neoplasm/di [Diagnosis]; microscopy; mouth cancer; mucus; principal component analysis; *Raman spectrometry; refraction index; review; signal noise ratio; skin irritation; tissue microarray; urine cytology; uterine cervix cancer; vagina flora; workflow; lactic acid/ec [Endogenous Compound]; optical tweezers.

Device Index Terms

optical tweezers.

Drug Index Terms

lactic acid / endogenous compound.

Other Index Terms

bronchoscopy; cancer screening; cancer staging; cytology; *cytopathology; data analysis; discriminant analysis; dizziness; eye irritation; fine needle aspiration biopsy; human; lung cancer; *malignant neoplasm / *diagnosis; microscopy; mouth cancer; mucus; principal component analysis; *Raman spectrometry; refraction index; Review; signal noise ratio; skin irritation; tissue microarray; urine cytology; uterine cervix cancer; vagina flora; workflow.

Link to the Ovid Full Text or citation:

[Click here for full text options](https://ovidsp.ovid.com/ovidweb.cgi?T=JS&CSC=Y&NEWS=N&PAGE=fulltext&D=emed22&AN=2012386363)

Link to the External Link Resolver:

[SFX](https://sfx-86scu.hosted.exlibrisgroup.com.cn/86scu?sid=OVID:embase&id=pmid:34117476&id=doi:10.1038%2Fs41596-021-00559-5&issn=17542189&isbn=&volume=16&issue=7&spage=3716&pages=3716-3735&date=2021&title=Nature+Protocols&atitle=Raman+spectral+cytopathology+for+cancer+diagnostic+applications&aulast=Traynor&pid=<author>Traynor+D.%3BBehl+I.%3BO'Dea+D.%3BBonnier+F.%3BNicholson+S.%3BO'Connell+F.%3BMaguire+A.%3BFlint+S.%3BGalvin+S.%3BHealy+C.M.%3BMartin+C.M.%3BO'Leary+J.J.%3BMalkin+A.%3BByrne+H.J.%3BLyng+F.M.<%2Fauthor><AN>2012386363<%2FAN><DT>Review<%2FDT>)

62.

Risk prediction by Raman spectroscopy for disease-free survival in oral cancers.

Bhattacharjee A., Hole A., Malik A., Sahu A., Singh S.P., Deshmukh A., Nair S., Chaturvedi P., Murali Krishna C.

Lasers in Medical Science. 36(8) (pp 1691-1700), 2021. Date of Publication: October 2021.

AN: 2010693163

In the present study, the potential of Raman spectroscopy (RS) in predicting disease-free survival (DFS) in oral cancer patients has been explored. Raman spectra were obtained from the tumor and contralateral regions of 94 oral squamous cell carcinoma patients. These patients were managed surgically and recommended for adjuvant therapy. The Cox proportional survival analysis was carried out to identify the spectral regions that can be correlated to DFS. The survival analysis was performed with 95% confidence intervals, hazard ratio, and p-values in the 1200-1800 cm-1 spectral region. Out of a total of 182 spectral points, 76 were found to be correlating with DFS, suggesting their utility to predict the patient outcome. The cut-off points of each correlating RS-point values were defined and tested towards predicting the DFS. The performance of predicting the power of spectral points was validated through Brier value, and it was found to be closer to the actual progression. The 76 spectral points identified from the tumors have the potential to accurately predict DFS in oral squamous cell carcinoma through a relatively simplistic prediction model in the absence of confounding factors.

Copyright © 2021, The Author(s), under exclusive licence to Springer-Verlag London Ltd. part of Springer Nature.

PMID

33661401 [<https://www.ncbi.nlm.nih.gov/pubmed/?term=33661401>]

Author NameID

Murali Krishna C.; ORCID: <https://orcid.org/0000-0002-4974-8533>

Institution

(Bhattacharjee, Chaturvedi) Section of Biostatistics, Centre for Cancer Epidemiology, Tata Memorial Centre, Mumbai, India (Bhattacharjee) Homi Bhabha National Institute, Mumbai, India

(Hole, Sahu, Singh, Deshmukh, Murali Krishna) Chilakapati Laboratory, Advanced Center for Training, Research, and Education in Cancer (ACTREC), Tata Memorial Center, Kharghar, Sector '22', Navi Mumbai 410210, India

(Malik, Nair, Chaturvedi, Murali Krishna) Head and Neck Surgical Oncology, Tata Memorial Center, Mumbai, India

(Malik, Nair, Chaturvedi) Department of Head Neck Surgery, Tata Memorial Centre, Mumbai, India

Publisher

Springer Science and Business Media Deutschland GmbH

Emtree Heading

article; cancer adjuvant therapy; cancer model; cancer patient; cancer surgery; confidence interval; confounding variable; *disease free survival; hazard ratio; human; major clinical study; *mouth squamous cell carcinoma; prediction; proportional hazards model; *Raman spectrometry; *risk assessment; survival analysis; spectrometer; HE-785; raman spectrometer.

Candidate Terms

HE-785 [device term] Raman spectrometer [device term]

Device Index Terms

spectrometer.

Other Index Terms

Article; cancer adjuvant therapy; cancer model; cancer patient; cancer surgery; confidence interval; confounding variable; *disease free survival; hazard ratio; human; major clinical study; *mouth squamous cell carcinoma; prediction; proportional hazards model; *Raman spectrometry; *risk assessment; survival analysis.

Link to the Ovid Full Text or citation:

[Click here for full text options](https://ovidsp.ovid.com/ovidweb.cgi?T=JS&CSC=Y&NEWS=N&PAGE=fulltext&D=emed22&AN=2010693163)

Link to the External Link Resolver:

[SFX](https://sfx-86scu.hosted.exlibrisgroup.com.cn/86scu?sid=OVID:embase&id=pmid:33661401&id=doi:10.1007%2Fs10103-021-03276-3&issn=02688921&isbn=&volume=36&issue=8&spage=1691&pages=1691-1700&date=2021&title=Lasers+in+Medical+Science&atitle=Risk+prediction+by+Raman+spectroscopy+for+disease-free+survival+in+oral+cancers&aulast=Bhattacharjee&pid=<author>Bhattacharjee+A.%3BHole+A.%3BMalik+A.%3BSahu+A.%3BSingh+S.P.%3BDeshmukh+A.%3BNair+S.%3BChaturvedi+P.%3BMurali+Krishna+C.<%2Fauthor><AN>2010693163<%2FAN><DT>Article<%2FDT>)

63.

Imaging of Oral SCC Cells by Raman Micro-Spectroscopy Technique.

Kinoshita H., Miyoshi N., Ogasawara T.

Molecules (Basel, Switzerland). 26(12) (no pagination), 2021. Date of Publication: 15 Jun 2021.

AN: 635510570

We used Raman micro-spectroscopy technique to analyze the molecular changes associated with oral squamous cell carcinoma (SCC) cells in the form of frozen tissue. Previously, Raman micro-spectroscopy technique on human tissue was mainly based on spectral analysis, but we worked on imaging of molecular structure. In this study, we evaluated the distribution of four components at the cell level (about 10 mum) to describe the changes in protein and molecular structures of protein belonging to malignant tissue. We analyzed ten oral SCC samples of five patients without special pretreatments of the use of formaldehyde. We obtained cell level images of the oral SCC cells at various components (peak at 935 cm-1: proline and valine, 1004 cm-1: phenylalanine, 1223 cm-1: nucleic acids, and 1650 cm-1: amide I). These mapping images of SCC cells showed the distribution of nucleic acids in the nuclear areas; meanwhile, proline and valine, phenylalanine, and amide I were detected in the cytoplasm areas of the SCC cells. Furthermore, the peak of amide I in the cancer area shifts to the higher wavenumber side, which indicates the alpha-helix component may decrease in its relative amounts of protein in the beta-sheet or random coil conformation. Imaging of SCC cells with Raman micro-spectroscopy technique indicated that such a new observation of cancer cells is useful for analyzing the detailed distribution of various molecular conformation within SCC cells.

PMID

34203597 [<https://www.ncbi.nlm.nih.gov/pubmed/?term=34203597>]

Institution

(Kinoshita, Ogasawara) Division of Dentistry and Oral Surgery, Fukui General Hospital, Egami, Fukui 910-8561, Japan (Kinoshita) Department of Rehabilitation Medicine, Fukui College of Health Sciences, Egami, Fukui 910-3190, Japan

(Miyoshi) Department of Gastroenterology, Faculty of Medicine, Tsukuba University, Tennoudai, Tsukuba 305-8575, Japan

Publisher

NLM (Medline)

Emtree Heading

cell nucleus; conformation; cytoplasm; diagnostic imaging; human; image processing; Japan; metabolism; mouth tumor; pathology; procedures; Raman spectrometry; squamous cell carcinoma.

Other Index Terms

cell nucleus; conformation; cytoplasm; diagnostic imaging; human; image processing; Japan; metabolism; mouth tumor; pathology; procedures; Raman spectrometry; squamous cell carcinoma.

Link to the Ovid Full Text or citation:

[Click here for full text options](https://ovidsp.ovid.com/ovidweb.cgi?T=JS&CSC=Y&NEWS=N&PAGE=fulltext&D=emed22&AN=635510570)

Link to the External Link Resolver:

[SFX](https://sfx-86scu.hosted.exlibrisgroup.com.cn/86scu?sid=OVID:embase&id=pmid:34203597&id=doi:10.3390%2Fmolecules26123640&issn=14203049&isbn=&volume=26&issue=12&spage=3640&pages=&date=2021&title=Molecules+(Basel%2C+Switzerland)&atitle=Imaging+of+Oral+SCC+Cells+by+Raman+Micro-Spectroscopy+Technique&aulast=Kinoshita&pid=<author>Kinoshita+H.%3BMiyoshi+N.%3BOgasawara+T.<%2Fauthor><AN>635510570<%2FAN><DT>Article<%2FDT>)

64.

Experimental study on needle insertion force to minimize tissue deformation in tongue tissue.

Aaboubout Y., Nunes Soares M.R., Barroso E.M., van der Sar L.C., Bocharnikov A., Usenov I., Artyushenko V., Caspers P.J., Koljenovic S., Bakker Schut T.C., van den Dobbelsteen J.J., Puppels G.J.

Medical Engineering and Physics. 97 (pp 40-46), 2021. Date of Publication: November 2021.

AN: 2015062758

This study reports on the effects of insertion velocity, needle tip geometry and needle diameter on tissue deformation and maximum insertion force. Moreover, the effect of multiple insertions with the same needle on the maximum insertion force is reported. The tissue deformation and maximum insertion force strongly depend on the insertion velocity and the tip geometry. No correlation was found between the outer diameter and the maximum insertion force for small needles (30G - 32G). The endurance experiments showed no remarkable difference in the maximum insertion force during 100 insertions.

Copyright © 2021

PMID

34756337 [<https://www.ncbi.nlm.nih.gov/pubmed/?term=34756337>]

Author NameID

Koljenovic S.; ORCID: <https://orcid.org/0000-0002-5185-3455> Caspers P.J.; ORCID: <https://orcid.org/0000-0002-6122-5049>

Puppels G.J.; ORCID: <https://orcid.org/0000-0001-8017-1923>

Institution

(Aaboubout, Nunes Soares, Barroso, van der Sar, Koljenovic) Department of Pathology, Erasmus MC, University Medical Center Rotterdam, Wytemaweg 80 CN, Rotterdam 3015, Netherlands (Aaboubout) Department of Otorhinolaryngology and Head and Neck Surgery, Erasmus MC, University Medical Center Rotterdam, Netherlands

(Barroso) Department of Oral and Maxillofacial Surgery, Erasmus MC, University Medical Center Rotterdam, Netherlands

(Barroso, Caspers, Bakker Schut, Puppels) Department of Dermatology, Erasmus MC, University Medical Center Rotterdam, Netherlands

(Bocharnikov, Usenov, Artyushenko) Art Photonics GmbH, Berlin, Germany

(van den Dobbelsteen) Department of Biomechanical Engineering, Delft University of Technology, Delft, Netherlands

Publisher

Elsevier Ltd

Emtree Heading

animal tissue; article; controlled study; equipment design; experimental study; *medical parameters; mouth cavity; *mouth tissue; nonhuman; *tissue and organ preparation and culture; gauge; needle; insertion velocity; maximum insertion force; needle diameter; *needle insertion force; needle tip geometry; *tissue deformation; *tongue tissue.

Candidate Terms

insertion velocity [other term] maximum insertion force [other term]

needle diameter [other term]

*needle insertion force [other term]

needle tip geometry [other term]

*tissue deformation [other term]

*tongue tissue [other term]

Device Index Terms

gauge; needle.

Other Index Terms

animal tissue; Article; controlled study; equipment design; experimental study; *medical parameters; mouth cavity; *mouth tissue; nonhuman; *tissue and organ preparation and culture.

Link to the Ovid Full Text or citation:

[Click here for full text options](https://ovidsp.ovid.com/ovidweb.cgi?T=JS&CSC=Y&NEWS=N&PAGE=fulltext&D=emed22&AN=2015062758)

Link to the External Link Resolver:

[SFX](https://sfx-86scu.hosted.exlibrisgroup.com.cn/86scu?sid=OVID:embase&id=pmid:34756337&id=doi:10.1016%2Fj.medengphy.2021.10.003&issn=13504533&isbn=&volume=97&issue=&spage=40&pages=40-46&date=2021&title=Medical+Engineering+and+Physics&atitle=Experimental+study+on+needle+insertion+force+to+minimize+tissue+deformation+in+tongue+tissue&aulast=Aaboubout&pid=<author>Aaboubout+Y.%3BNunes+Soares+M.R.%3BBarroso+E.M.%3Bvan+der+Sar+L.C.%3BBocharnikov+A.%3BUsenov+I.%3BArtyushenko+V.%3BCaspers+P.J.%3BKoljenovic+S.%3BBakker+Schut+T.C.%3Bvan+den+Dobbelsteen+J.J.%3BPuppels+G.J.<%2Fauthor><AN>2015062758<%2FAN><DT>Article<%2FDT>)

65.

RuCo alloy trifunctional electrocatalysts with ratio-dependent activity for Zn-air batteries and self-powered water splitting.

Pei Y., He W., Wang M., Sun T., Hu L., Zhu J., Tan Y., Wang J.

Chemical Communications. 57(12) (pp 1498-1501), 2021. Date of Publication: 11 Feb 2021.

AN: 634206138

Herein, we reported a RuCo alloy with nitrogen-doped porous carbon (RuCo/NPC) as efficient trifunctional electrocatalysts for Zn-air batteries and water splitting. The versatility and catalytic activity of this catalyst is achieved by adjusting the Ru/Co ratio. The as-assembled Zn-air battery and overall water splitting with RuCo/NPC present outstanding catalytic performances.

Copyright © The Royal Society of Chemistry 2021.

PMID

33443250 [<https://www.ncbi.nlm.nih.gov/pubmed/?term=33443250>]

Institution

(Pei, He, Wang) State Key Laboratory of High-Performance Ceramics and Superfine Microstructure, Shanghai Institute of Ceramics, Chinese Academy of Sciences, 585 Heshuo Road, Shanghai 201899, China (Pei, Wang) Center of Materials Science and Optoelectronics Engineering, University of Chinese Academy of Sciences, Beijing 100049, China

(Wang, Wang, Sun, Hu, Zhu, Tan) College of Chemistry and Chemical Engineering, Nantong University, Nantong 226019, China

Publisher

Royal Society of Chemistry

Emtree Heading

article; *catalyst; cost benefit analysis; electrochemical analysis; *electrochemistry; electrolysis; high resolution transmission electron microscopy; porosity; Raman spectrometry; surface property; X ray diffraction; *alloy; carbon; *carbon monoxide; metal nanoparticle; nitrogen; *ruthenium; water; *zinc.

Drug Index Terms

*alloy; carbon; *carbon monoxide; metal nanoparticle; nitrogen; *ruthenium; water; *zinc.

Other Index Terms

Article; *catalyst; cost benefit analysis; electrochemical analysis; *electrochemistry; electrolysis; high resolution transmission electron microscopy; porosity; Raman spectrometry; surface property; X ray diffraction.

Link to the Ovid Full Text or citation:

[Click here for full text options](https://ovidsp.ovid.com/ovidweb.cgi?T=JS&CSC=Y&NEWS=N&PAGE=fulltext&D=emed22&AN=634206138)

Link to the External Link Resolver:

[SFX](https://sfx-86scu.hosted.exlibrisgroup.com.cn/86scu?sid=OVID:embase&id=pmid:33443250&id=doi:10.1039%2Fd0cc07565e&issn=13597345&isbn=&volume=57&issue=12&spage=1498&pages=1498-1501&date=2021&title=Chemical+Communications&atitle=RuCo+alloy+trifunctional+electrocatalysts+with+ratio-dependent+activity+for+Zn-air+batteries+and+self-powered+water+splitting&aulast=Pei&pid=<author>Pei+Y.%3BHe+W.%3BWang+M.%3BSun+T.%3BHu+L.%3BZhu+J.%3BTan+Y.%3BWang+J.<%2Fauthor><AN>634206138<%2FAN><DT>Article<%2FDT>)

66.

Raman spectroscopy and surface-enhanced Raman spectroscopy (SERS) spectra of salivary glands carcinoma, tumor and healthy tissues and their homogenates analyzed by chemometry: Towards development of the novel tool for clinical diagnosis.

Czaplicka M., Kowalska A.A., Nowicka A.B., Kurzydlowski D., Gronkiewicz Z., Machulak A., Kukwa W., Kaminska A.

Analytica Chimica Acta. 1177 (no pagination), 2021. Article Number: 338784. Date of Publication: 08 Sep 2021.

AN: 2013287707

In this study, two approaches to salivary glands studies are presented: Raman imaging (RI) of tissue cross-section and surface-enhanced Raman spectroscopy (SERS) of tissue homogenates prepared according to elaborated protocol. Collected and analyzed data demonstrate the significant potential of SERS combined with multivariate analysis for distinguishing carcinoma or tumor from the normal salivary gland tissues as a rapid, label-free tool in cancer detection in oncological diagnostics. Raman imaging allows a detailed analysis of the cell wall's chemical composition; thus, the compound's distribution can be semi-quantitatively analyzed, while SERS of tissue homogenates allow for detailed analysis of all moieties forming these tissues. In this sense, SERS is more sensitive and reliable to study any changes in the area of infected tissues. Principal component analysis (PCA), as an unsupervised pattern recognition method, was used to identify the differences in the SERS salivary glands homogenates. The partial least squares-discriminant analysis (PLS-DA), the supervised pattern classification technique, was also used to strengthen further the computed model based on the latent variables in the SERS spectra. Moreover, the chemometric quantification of obtained data was analyzed using principal component regression (PCR) multivariate calibration. The presented data prove that the PCA algorithm allows for 91% in seven following components and the determination between healthy and tumor salivary gland homogenates. The PCR and PLS-DA methods predict 90% and 95% of the variance between the studied groups (in 6 components and 4 factors, respectively). Moreover, according to calculated RMSEC (RMSEP), R2C (R2P) values and correlation accuracy (based on the ROC curve), the PLS-DA model fits better for the studied data. Thus, SERS methods combined with PLS-DA analysis can be used to differentiate healthy, neoplastic, and mixed tissues as a competitive tool in relation to the commonly used method of histopathological staining of tumor tissue.

Copyright © 2021 Elsevier B.V.

PMID

34482902 [<https://www.ncbi.nlm.nih.gov/pubmed/?term=34482902>]

Institution

(Czaplicka, Kowalska, Nowicka, Kaminska) Institute of Physical Chemistry, Polish Academy of Sciences, Kasprzaka 44/52, Warsaw 01-224, Poland (Kurzydlowski) Cardinal Stefan Wyszynski University in Warsaw, Dewajtis 5, Warsaw 01-815, Poland

(Gronkiewicz, Machulak, Kukwa) Szpital Czerniakowski, Medical University of Warsaw, Zwirki I Wigury 61, Warsaw 02-091, Poland

Publisher

Elsevier B.V.

Emtree Heading

article; calibration; chemical composition; *chemometrics; clinical article; controlled study; discriminant analysis; human; human tissue; multivariate analysis; partial least squares regression; pattern recognition; principal component analysis; *Raman spectrometry; reliability; salivary gland; *salivary gland carcinoma/di [Diagnosis]; *salivary gland tumor/di [Diagnosis]; sensitivity analysis; structural equation modeling; *surface enhanced Raman spectroscopy; *tissue homogenate.

Other Index Terms

Article; calibration; chemical composition; *chemometrics; clinical article; controlled study; discriminant analysis; human; human tissue; multivariate analysis; partial least squares regression; pattern recognition; principal component analysis; *Raman spectrometry; reliability; salivary gland; *salivary gland carcinoma / *diagnosis; *salivary gland tumor / *diagnosis; sensitivity analysis; structural equation modeling; *surface enhanced Raman spectroscopy; *tissue homogenate.

Link to the Ovid Full Text or citation:

[Click here for full text options](https://ovidsp.ovid.com/ovidweb.cgi?T=JS&CSC=Y&NEWS=N&PAGE=fulltext&D=emed22&AN=2013287707)

Link to the External Link Resolver:

[SFX](https://sfx-86scu.hosted.exlibrisgroup.com.cn/86scu?sid=OVID:embase&id=pmid:34482902&id=doi:10.1016%2Fj.aca.2021.338784&issn=00032670&isbn=&volume=1177&issue=&spage=338784&pages=&date=2021&title=Analytica+Chimica+Acta&atitle=Raman+spectroscopy+and+surface-enhanced+Raman+spectroscopy+(SERS)+spectra+of+salivary+glands+carcinoma%2C+tumor+and+healthy+tissues+and+their+homogenates+analyzed+by+chemometry%3A+Towards+development+of+the+novel+tool+for+clinical+diagnosis&aulast=Czaplicka&pid=<author>Czaplicka+M.%3BKowalska+A.A.%3BNowicka+A.B.%3BKurzydlowski+D.%3BGronkiewicz+Z.%3BMachulak+A.%3BKukwa+W.%3BKaminska+A.<%2Fauthor><AN>2013287707<%2FAN><DT>Article<%2FDT>)

67.

Developing an algorithm for discriminating oral cancerous and normal tissues using raman spectroscopy.

Sharma M., Jeng M.-J., Young C.-K., Huang S.-F., Chang L.-B.

Journal of Personalized Medicine. 11(11) (no pagination), 2021. Article Number: 1165. Date of Publication: November 2021.

AN: 2014614150

The aim of this study was to investigate the clinical potential of Raman spectroscopy (RS) in detecting oral squamous cell carcinoma (OSCC) in tumor and healthy tissues in surgical resection specimens during surgery. Raman experiments were performed on cryopreserved specimens from patients with OSCC. Univariate and multivariate analysis was performed based on the fingerprint region (700-1800 cm-1) of the Raman spectra. One hundred thirty-one ex-vivo Raman experiments were performed on 131 surgical resection specimens obtained from 67 patients. The principal component analysis (PCA) and partial least square (PLS) methods with linear discriminant analysis (LDA) were applied on an independent validation dataset. Both models were able to differentiate between the tissue types, but PLS-LDA showed 100% accuracy, sensitivity, and specificity. In this study, Raman measurements of fresh resection tissue specimens demonstrated that OSCC had significantly higher nucleic acid, protein, and several amino acid contents than adjacent healthy tissues. The specific spectral information obtained in this study can be used to develop an in vivo Raman spectroscopic method for the tumor-free resection boundary during surgery.

Copyright © 2021 by the authors. Licensee MDPI, Basel, Switzerland.

Institution

(Sharma, Jeng, Chang) Department of Electronic Engineering, Chang Gung University, Taoyuan 333, Taiwan (Republic of China) (Jeng, Huang, Chang) Department of Otolaryngology-Head and Neck Surgery, Chang Gung Memorial Hospital, Linkou 244, Taiwan (Republic of China)

(Young) Department of Otolaryngology, Head and Neck Surgery, Chang Gung Memorial Hospital, Keelung Branch, Keelung 204, Taiwan (Republic of China)

(Huang) Department of Public Health, Chang Gung University, Taoyuan 333, Taiwan (Republic of China)

(Chang) Green Technology Research Center, Chang Gung University, Taoyuan 333, Taiwan (Republic of China)

Publisher

MDPI

Emtree Heading

*algorithm; area under the curve; article; classifier; controlled study; cryopreservation; data processing; diagnostic accuracy; diagnostic test accuracy study; discriminant analysis; human; human tissue; infrared spectroscopy; *least square analysis; machine learning; major clinical study; metabolomics; morphology; *mouth squamous cell carcinoma; nonhuman; overall survival; principal component analysis; qualitative research; *Raman spectrometry; receiver operating characteristic; sensitivity and specificity; signal noise ratio; support vector machine; training; validation process; validation study; amino acid; carotenoid; hydroxyproline; nucleic acid; protein; terpenoid; *tryptophan.

Drug Index Terms

amino acid; carotenoid; hydroxyproline; nucleic acid; protein; terpenoid; *tryptophan.

Other Index Terms

*algorithm; area under the curve; Article; classifier; controlled study; cryopreservation; data processing; diagnostic accuracy; diagnostic test accuracy study; discriminant analysis; human; human tissue; infrared spectroscopy; *least square analysis; machine learning; major clinical study; metabolomics; morphology; *mouth squamous cell carcinoma; nonhuman; overall survival; principal component analysis; qualitative research; *Raman spectrometry; receiver operating characteristic; sensitivity and specificity; signal noise ratio; support vector machine; training; validation process; validation study.

Link to the Ovid Full Text or citation:

[Click here for full text options](https://ovidsp.ovid.com/ovidweb.cgi?T=JS&CSC=Y&NEWS=N&PAGE=fulltext&D=emed22&AN=2014614150)

Link to the External Link Resolver:

[SFX](https://sfx-86scu.hosted.exlibrisgroup.com.cn/86scu?sid=OVID:embase&id=pmid:&id=doi:10.3390%2Fjpm11111165&issn=20754426&isbn=&volume=11&issue=11&spage=1165&pages=&date=2021&title=Journal+of+Personalized+Medicine&atitle=Developing+an+algorithm+for+discriminating+oral+cancerous+and+normal+tissues+using+raman+spectroscopy&aulast=Sharma&pid=<author>Sharma+M.%3BJeng+M.-J.%3BYoung+C.-K.%3BHuang+S.-F.%3BChang+L.-B.<%2Fauthor><AN>2014614150<%2FAN><DT>Article<%2FDT>)

68.

A new look into cancer-a review on the contribution of vibrational spectroscopy on early diagnosis and surgery guidance.

Mamede A.P., Santos I.P., Batista de Carvalho A.L.M., Figueiredo P., Silva M.C., Tavares M.V., Marques M.P.M., Batista de Carvalho L.A.E.

Cancers. 13(21) (no pagination), 2021. Article Number: 5336. Date of Publication: November-1 2021.

AN: 2014205476

In 2020, approximately 10 million people died of cancer, rendering this disease the second leading cause of death worldwide. Detecting cancer in its early stages is paramount for patients' prognosis and survival. Hence, the scientific and medical communities are engaged in improving both therapeutic strategies and diagnostic methodologies, beyond prevention. Optical vibrational spectroscopy has been shown to be an ideal diagnostic method for early cancer diagnosis and surgical margins assessment, as a complement to histopathological analysis. Being highly sensitive, non-invasive and capable of real-time molecular imaging, Raman and Fourier transform infrared (FTIR) spectroscopies give information on the biochemical profile of the tissue under analysis, detecting the metabolic differences between healthy and cancerous portions of the same sample. This constitutes tremendous progress in the field, since the cancer-prompted morphological alterations often occur after the biochemical imbalances in the oncogenic process. Therefore, the early cancer-associated metabolic changes are unnoticed by the histopathologist. Additionally, Raman and FTIR spectroscopies significantly reduce the subjectivity linked to cancer diagnosis. This review focuses on breast and head and neck cancers, their clinical needs and the progress made to date using vibrational spectroscopy as a diagnostic technique prior to surgical intervention and intraoperative margin assessment.

Copyright © 2021 by the authors. Licensee MDPI, Basel, Switzerland.

Institution

(Mamede, Santos, Batista de Carvalho, Tavares, Marques, Batista de Carvalho) "Unidade de I&D Quimica-Fisica Molecular" (QFM-UC), Departament of Chemistry, University of Coimbra, Coimbra 3004-504, Portugal (Figueiredo) Pathology Department, Portuguese Institute of Oncology Francisco Gentil (IPOFG), Coimbra 3000-075, Portugal

(Silva) Surgery Department, Portuguese Institute of Oncology Francisco Gentil (IPOFG), Coimbra 3000-075, Portugal

(Tavares) Gynaecology Department, Portuguese Institute of Oncology Francisco Gentil (IPOFG), Porto 4200-072, Portugal

(Marques) Department of Life Sciences, University of Coimbra, Coimbra 3000-456, Portugal

Publisher

MDPI

Emtree Heading

autofluorescence imaging; breast biopsy; breast cancer/di [Diagnosis]; breast cancer/rt [Radiotherapy]; breast cancer/su [Surgery]; breast ductal carcinoma/di [Diagnosis]; breast-conserving surgery; cancer prognosis; *cancer surgery; classification algorithm; diagnostic accuracy; *early cancer diagnosis; Fourier transform infrared spectroscopy; frozen section; glioblastoma; head and neck cancer/di [Diagnosis]; head and neck cancer/su [Surgery]; histopathology; human; luminal A breast cancer/di [Diagnosis]; lumpectomy; lymph node metastasis/di [Diagnosis]; mastectomy; mouth cancer/di [Diagnosis]; near infrared reflectance spectroscopy; nonhuman; papillomavirus infection; Raman spectrometry; review; sensitivity and specificity; surface enhanced Raman spectroscopy; surgical margin; tissue microarray; tongue carcinoma/su [Surgery]; tumor localization; *vibrational spectroscopy; epidermal growth factor receptor 2/ec [Endogenous Compound]; estrogen receptor/ec [Endogenous Compound]; Ki 67 antigen/ec [Endogenous Compound]; progesterone receptor/ec [Endogenous Compound].

Drug Index Terms

epidermal growth factor receptor 2 / endogenous compound; estrogen receptor / endogenous compound; Ki 67 antigen / endogenous compound; progesterone receptor / endogenous compound.

Other Index Terms

autofluorescence imaging; breast biopsy; breast cancer / diagnosis / radiotherapy / surgery; breast ductal carcinoma / diagnosis; breast-conserving surgery; cancer prognosis; *cancer surgery; classification algorithm; diagnostic accuracy; *early cancer diagnosis; Fourier transform infrared spectroscopy; frozen section; glioblastoma; head and neck cancer / diagnosis / surgery; histopathology; human; luminal A breast cancer / diagnosis; lumpectomy; lymph node metastasis / diagnosis; mastectomy; mouth cancer / diagnosis; near infrared reflectance spectroscopy; nonhuman; papillomavirus infection; Raman spectrometry; Review; sensitivity and specificity; surface enhanced Raman spectroscopy; surgical margin; tissue microarray; tongue carcinoma / surgery; tumor localization; *vibrational spectroscopy.

Link to the Ovid Full Text or citation:

[Click here for full text options](https://ovidsp.ovid.com/ovidweb.cgi?T=JS&CSC=Y&NEWS=N&PAGE=fulltext&D=emed22&AN=2014205476)

Link to the External Link Resolver:

[SFX](https://sfx-86scu.hosted.exlibrisgroup.com.cn/86scu?sid=OVID:embase&id=pmid:&id=doi:10.3390%2Fcancers13215336&issn=20726694&isbn=&volume=13&issue=21&spage=5336&pages=&date=2021&title=Cancers&atitle=A+new+look+into+cancer-a+review+on+the+contribution+of+vibrational+spectroscopy+on+early+diagnosis+and+surgery+guidance&aulast=Mamede&pid=<author>Mamede+A.P.%3BSantos+I.P.%3BBatista+de+Carvalho+A.L.M.%3BFigueiredo+P.%3BSilva+M.C.%3BTavares+M.V.%3BMarques+M.P.M.%3BBatista+de+Carvalho+L.A.E.<%2Fauthor><AN>2014205476<%2FAN><DT>Review<%2FDT>)

69.

Raman spectroscopy discloses altered molecular profile in thyroid adenomas.

Sodo A., Verri M., Palermo A., Naciu A.M., Sponziello M., Durante C., Di Gioacchino M., Paolucci A., Di Masi A., Longo F., Crucitti P., Taffon C., Ricci M.A., Crescenzi A.

Diagnostics. 11(1) (no pagination), 2021. Article Number: 43. Date of Publication: January 2021.

AN: 2007424451

Follicular patterned nodules are sometimes complex to be classified due to ambiguous nuclear features and/or questionable capsular or vascular invasion. In this setting, there is a poor inter-observer concordance even among expert pathologists. Raman spectroscopy was recently used to separate benign and malignant thyroid nodules based on their molecular fingerprint; anyway, some histologically proved follicular adenomas were clustered as having a characteristic profile of malignant lesions. In this study, we analyzed five follicular thyroid adenomas with a malignant spectroscopic profile compared to five follicular adenomas with a benign Raman spectrum in order to assess possible molecular differences between the two groups. Morphological, immunohistochem-ical, and molecular analyses evidenced expression of malignancy-associated proteins in four out of five malignant clustered adenomas. The remaining malignant clustered adenoma showed a TSHR mutation previously associated with autonomously functioning follicular carcinomas. In conclu-sion, thyroid follicular adenomas are a group of morphologically benign neoplasms that may have altered the mutational or expression profile; cases of adenomas with altered immunophenotype are recognized as showing a profile associated with malignancy by Raman spectroscopy. This correlation warrants a more extensive evaluation and suggests a potential predictive value of spectroscopic assessment in recognizing characteristics associated with tumor progression in follicular thyroid neoplasms.

Copyright © 2020 by the authors. Licensee MDPI, Basel, Switzerland.

Institution

(Sodo, Di Gioacchino, Paolucci, Di Masi, Ricci) Department of Sciences, University Roma Tre, Rome 00146, Italy (Verri, Taffon, Crescenzi) Pathology Unit, Campus Bio-Medico University Hospital, Rome 00128, Italy

(Palermo, Naciu) Unit of Endocrinology and Diabetes, Campus Bio-Medico University, Rome 00128, Italy

(Sponziello, Durante) Department of Translational and Precision Medicine, Sapienza University of Rome, Rome 00185, Italy

(Longo, Crucitti) Unit of Thoracic Surgery, Campus Bio-Medico University Hospital, Rome 00128, Italy

Publisher

MDPI

Emtree Heading

adult; aged; article; cancer diagnosis; carcinogenesis; clinical article; cluster analysis; comparative study; correlational study; digital polymerase chain reaction; female; follicular carcinoma/et [Etiology]; frozen section; gain of function mutation; gene; gene mutation; hierarchical clustering; high throughput sequencing; human; human tissue; immunohistochemistry; immunophenotyping; lobectomy; male; middle aged; *molecular fingerprinting; morphological trait; predictive value; protein expression; *Raman spectrometry; surgical margin; *thyroid adenoma/di [Diagnosis]; *thyroid adenoma/et [Etiology]; *thyroid adenoma/su [Surgery]; thyroid follicular cell; thyroid gland tissue; thyroid parafollicular cell; thyroidectomy; eosin; hematoxylin; microRNA/ec [Endogenous Compound]; molecular marker/ec [Endogenous Compound]; unclassified drug; agglomerative hierarchical clustering analysis; EIF1AX gene; *follicular thyroid adenoma/di [Diagnosis]; *follicular thyroid adenoma/et [Etiology]; *follicular thyroid adenoma/su [Surgery]; TSHR gene; microrna 146b/ec [Endogenous Compound].

Candidate Terms

agglomerative hierarchical clustering analysis [other term] eif1ax gene [other term]

*follicular thyroid adenoma / *diagnosis / *etiology / *surgery [other term]

tshr gene [other term]

microRNA 146b / endogenous compound [drug term]

Drug Index Terms

eosin; hematoxylin; microRNA / endogenous compound; molecular marker / endogenous compound; unclassified drug.

Other Index Terms

adult; aged; Article; cancer diagnosis; carcinogenesis; clinical article; cluster analysis; comparative study; correlational study; digital polymerase chain reaction; female; follicular carcinoma / etiology; frozen section; gain of function mutation; gene; gene mutation; hierarchical clustering; high throughput sequencing; human; human tissue; immunohistochemistry; immunophenotyping; lobectomy; male; middle aged; *molecular fingerprinting; morphological trait; predictive value; protein expression; *Raman spectrometry; surgical margin; *thyroid adenoma / *diagnosis / *etiology / *surgery; thyroid follicular cell; thyroid gland tissue; thyroid parafollicular cell; thyroidectomy.

Link to the Ovid Full Text or citation:

[Click here for full text options](https://ovidsp.ovid.com/ovidweb.cgi?T=JS&CSC=Y&NEWS=N&PAGE=fulltext&D=emed22&AN=2007424451)

Link to the External Link Resolver:

[SFX](https://sfx-86scu.hosted.exlibrisgroup.com.cn/86scu?sid=OVID:embase&id=pmid:&id=doi:10.3390%2Fdiagnostics11010043&issn=20754418&isbn=&volume=11&issue=1&spage=43&pages=&date=2021&title=Diagnostics&atitle=Raman+spectroscopy+discloses+altered+molecular+profile+in+thyroid+adenomas&aulast=Sodo&pid=<author>Sodo+A.%3BVerri+M.%3BPalermo+A.%3BNaciu+A.M.%3BSponziello+M.%3BDurante+C.%3BDi+Gioacchino+M.%3BPaolucci+A.%3BDi+Masi+A.%3BLongo+F.%3BCrucitti+P.%3BTaffon+C.%3BRicci+M.A.%3BCrescenzi+A.<%2Fauthor><AN>2007424451<%2FAN><DT>Article<%2FDT>)

70.

The potential of raman spectroscopy in the diagnosis of dysplastic and malignant oral lesions.

Ibrahim O., Toner M., Flint S., Byrne H.J., Lyng F.M.

Cancers. 13(4) (pp 1-14), 2021. Article Number: 619. Date of Publication: 02 Feb 2021.

AN: 2005945979

Early diagnosis, treatment and/or surveillance of oral premalignant lesions are important in preventing progression to oral squamous cell carcinoma (OSCC). The current gold standard is through histopathological diagnosis, which is limited by inter-and intra-observer errors and sampling errors. The objective of this work was to use Raman spectroscopy to discriminate between benign, mild, moderate and severe dysplasia and OSCC in formalin fixed paraffin preserved (FFPP) tissues. The study included 72 different pathologies from which 17 were benign lesions, 20 mildly dysplastic, 20 moderately dysplastic, 10 severely dysplastic and 5 invasive OSCC. The glass substrate and paraffin wax background were digitally removed and PLSDA with LOPO cross-validation was used to differentiate the pathologies. OSCC could be differentiated from the other pathologies with an accuracy of 70%, while the accuracy of the classifier for benign, moderate and severe dysplasia was ~60%. The accuracy of the classifier was lowest for mild dysplasia (~46%). The main discriminating features were increased nucleic acid contributions and decreased protein and lipid contributions in the epithelium and decreased collagen contributions in the connective tissue. Smoking and the presence of inflammation were found to significantly influence the Raman classification with respective accuracies of 76% and 94%.

Copyright © 2021 by the authors. Licensee MDPI, Basel, Switzerland.

Institution

(Ibrahim) School of Dental Science, Trinity College Dublin, Lincoln Place, Dublin 2 D02, Ireland (Toner) Central Pathology Laboratory, St. James Hospital, James Street, Dublin 8 D08, Ireland

(Flint) Oral Medicine Unit, Dublin Dental University Hospital, Trinity College Dublin, Lincoln Place, Dublin 2 D02, Ireland

(Byrne) FOCAS Research Institute, City Campus, Technological University Dublin, Kevin Street, Dublin 8 D08, Ireland

(Lyng) Radiation and Environmental Science Centre FOCAS Research Institute, City Campus, Technological University Dublin, Kevin Street, Dublin 8 D08, Ireland

(Lyng) School of Physics & Clinical & Optometric Sciences, City Campus, Technological University Dublin, Kevin Street, Dublin 8 D08, Ireland

Publisher

MDPI AG

Emtree Heading

adult; article; clinical feature; cohort analysis; connective tissue; controlled study; cross validation; diagnostic accuracy; disease severity; epithelium; female; human; human tissue; inflammation/di [Diagnosis]; major clinical study; male; *mouth cancer/di [Diagnosis]; *mouth disease/di [Diagnosis]; mouth epithelium; patient; precancer/di [Diagnosis]; *Raman spectrometry; sensitivity and specificity; smoking; tissue section; tumor invasion; collagen/ec [Endogenous Compound]; lipid/ec [Endogenous Compound]; nucleic acid; protein/ec [Endogenous Compound]; microscope; spectrophotometer; *oral dysplasia/di [Diagnosis]; Horiba Jobin Yvon LabRam HR 800; MPLAN N.

Candidate Terms

*oral dysplasia / *diagnosis [other term] Horiba Jobin Yvon LabRam HR 800 [device term]

MPLAN N [device term]

Device Index Terms

microscope; spectrophotometer.

Drug Index Terms

collagen / endogenous compound; lipid / endogenous compound; nucleic acid; protein / endogenous compound.

Other Index Terms

adult; Article; clinical feature; cohort analysis; connective tissue; controlled study; cross validation; diagnostic accuracy; disease severity; epithelium; female; human; human tissue; inflammation / diagnosis; major clinical study; male; *mouth cancer / *diagnosis; *mouth disease / *diagnosis; mouth epithelium; patient; precancer / diagnosis; *Raman spectrometry; sensitivity and specificity; smoking; tissue section; tumor invasion.

Link to the Ovid Full Text or citation:

[Click here for full text options](https://ovidsp.ovid.com/ovidweb.cgi?T=JS&CSC=Y&NEWS=N&PAGE=fulltext&D=emed22&AN=2005945979)

Link to the External Link Resolver:

[SFX](https://sfx-86scu.hosted.exlibrisgroup.com.cn/86scu?sid=OVID:embase&id=pmid:&id=doi:10.3390%2Fcancers13040619&issn=20726694&isbn=&volume=13&issue=4&spage=1&pages=1-14&date=2021&title=Cancers&atitle=The+potential+of+raman+spectroscopy+in+the+diagnosis+of+dysplastic+and+malignant+oral+lesions&aulast=Ibrahim&pid=<author>Ibrahim+O.%3BToner+M.%3BFlint+S.%3BByrne+H.J.%3BLyng+F.M.<%2Fauthor><AN>2005945979<%2FAN><DT>Article<%2FDT>)

71.

Incorporation of fixed oils into spearmint oil-loaded nanoemulsions and their influence on characteristic and cytotoxic properties against human oral cancer cells.

Tubtimsri S., Limmatvapirat C., Limsirichaikul S., Akkaramongkolporn P., Piriyaprasarth S., Patomchaiviwat V., Limmatvapirat S.

Journal of Drug Delivery Science and Technology. 63 (no pagination), 2021. Article Number: 102443. Date of Publication: June 2021.

AN: 2011194883

Spearmint oil (SMO) has been revealed to inhibit oral cancer cells. Its activity increases when it is incorporated into nanoemulsions. However, SMO alone cannot be prepared into stable nanoemulsions without an Ostwald ripening inhibitor. This study aimed to evaluate the effect of an Ostwald ripening inhibitor, i.e., fixed oil, on the formation and characteristic of anticancer nanoemulsions. Various fixed oils, namely, virgin coconut oil (VCO; C12), palm oil (PMO; C16), olive oil (OLO; C18:1), soybean oil (SBO; C18:2), and perilla oil (PRO; C18:3), were selected, and their abilities to stabilize nanoemulsions were compared. Results indicated that the formation and characteristic of nanoemulsions were dependent on the type of fixed oils and the ratio of SMO to fixed oils. Nevertheless, the stable nanoemulsions with nearly the same droplet size could be prepared at a ratio of 80:20 regardless of the type of fixed oils. The stable nanoemulsions might be a result of specific molecular interactions among surfactants, SMO, and fixed oils. Among the nanoemulsions with fixed oils, 80:20 SMO:PRO nanoemulsion showed the most potent cytotoxic effect against oral cancer cells and therefore was selected for further study. The influence of excipients on the properties, including droplet size, carvone content, and cytotoxic activity, of the formulated nanoemulsions were comparatively evaluated after storage at 40 degreeC for 6 months. Both nanoemulsions had excellent stability. An apoptotic property assay was employed to probe the cell death mechanism. 80:20 SMO:PRO nanoemulsion could induce cancer cell death via the intrinsic apoptosis pathway, which was the desirable pathway for candidate anticancer agents. In conclusion, nanoemulsions containing SMO with cytotoxic effects against oral cancer cells were successfully prepared by selecting specific amounts and types of surfactants and fixed oils. This research might serve as a basis for fabricating stable nanoemulsions containing other volatile oils.

Copyright © 2021 Elsevier B.V.

Author NameID

Limmatvapirat, Sontaya; ORCID: <https://orcid.org/0000-0002-3829-4062>

Institution

(Tubtimsri) Faculty of Pharmaceutical Science, Burapha University, Thailand (Limmatvapirat) Department of Pharmaceutical Chemistry, Faculty of Pharmacy, Silpakorn University, Thailand

(Limsirichaikul) Department of Biopharmacy, Faculty of Pharmacy, Silpakorn University, Thailand

(Tubtimsri, Akkaramongkolporn, Piriyaprasarth, Patomchaiviwat, Limmatvapirat) Department of Pharmaceutical Technology, Faculty of Pharmacy, Silpakorn University, Thailand

Publisher

Editions de Sante

Emtree Heading

*antineoplastic activity; apoptosis; apoptosis assay; apoptotic cell percentage; article; *cancer cell; cell death; cell viability; controlled study; down regulation; *drug cytotoxicity; flow cytometry; Fourier transform infrared spectroscopy; human; human cell; mitochondrion; molecular interaction; morphological trait; *mouth cancer; *nanoemulsion; nuclear magnetic resonance spectroscopy; nuclear Overhauser effect; Raman spectrometry; real time polymerase chain reaction; upregulation; viscosity; zeta potential; actin/ec [Endogenous Compound]; carvone; *coconut oil/an [Drug Analysis]; *coconut oil/pr [Pharmaceutics]; *coconut oil/pd [Pharmacology]; cytochrome c/ec [Endogenous Compound]; excipient; fluorouracil; glyceraldehyde 3 phosphate dehydrogenase/ec [Endogenous Compound]; macrogol; *olive oil/an [Drug Analysis]; *olive oil/pr [Pharmaceutics]; *olive oil/pd [Pharmacology]; *palm oil/an [Drug Analysis]; *palm oil/pr [Pharmaceutics]; *palm oil/pd [Pharmacology]; *perilla oil/an [Drug Analysis]; *perilla oil/pr [Pharmaceutics]; *perilla oil/pd [Pharmacology]; protein Bax/ec [Endogenous Compound]; protein bcl 2/ec [Endogenous Compound]; protein p53/ec [Endogenous Compound]; RNA 18S/ec [Endogenous Compound]; *soybean oil/an [Drug Analysis]; *soybean oil/pr [Pharmaceutics]; *soybean oil/pd [Pharmacology]; surfactant; unclassified drug; flow cytometer; microscope; *virgin coconut oil/an [Drug Analysis]; *virgin coconut oil/pr [Pharmaceutics]; *virgin coconut oil/pd [Pharmacology].

Candidate Terms

*virgin coconut oil / *drug analysis / *pharmaceutics / *pharmacology [drug term]

Device Index Terms

flow cytometer; microscope.

Drug Index Terms

actin / endogenous compound; carvone; *coconut oil / *drug analysis / *pharmaceutics / *pharmacology; cytochrome c / endogenous compound; excipient; fluorouracil; glyceraldehyde 3 phosphate dehydrogenase / endogenous compound; macrogol; *olive oil / *drug analysis / *pharmaceutics / *pharmacology; *palm oil / *drug analysis / *pharmaceutics / *pharmacology; *perilla oil / *drug analysis / *pharmaceutics / *pharmacology; protein Bax / endogenous compound; protein bcl 2 / endogenous compound; protein p53 / endogenous compound; RNA 18S / endogenous compound; *soybean oil / *drug analysis / *pharmaceutics / *pharmacology; surfactant; unclassified drug.

Other Index Terms

*antineoplastic activity; apoptosis; apoptosis assay; apoptotic cell percentage; Article; *cancer cell; cell death; cell viability; controlled study; down regulation; *drug cytotoxicity; flow cytometry; Fourier transform infrared spectroscopy; human; human cell; mitochondrion; molecular interaction; morphological trait; *mouth cancer; *nanoemulsion; nuclear magnetic resonance spectroscopy; nuclear Overhauser effect; Raman spectrometry; real time polymerase chain reaction; upregulation; viscosity; zeta potential.

Link to the Ovid Full Text or citation:

[Click here for full text options](https://ovidsp.ovid.com/ovidweb.cgi?T=JS&CSC=Y&NEWS=N&PAGE=fulltext&D=emed22&AN=2011194883)

Link to the External Link Resolver:

[SFX](https://sfx-86scu.hosted.exlibrisgroup.com.cn/86scu?sid=OVID:embase&id=pmid:&id=doi:10.1016%2Fj.jddst.2021.102443&issn=17732247&isbn=&volume=63&issue=&spage=102443&pages=&date=2021&title=Journal+of+Drug+Delivery+Science+and+Technology&atitle=Incorporation+of+fixed+oils+into+spearmint+oil-loaded+nanoemulsions+and+their+influence+on+characteristic+and+cytotoxic+properties+against+human+oral+cancer+cells&aulast=Tubtimsri&pid=<author>Tubtimsri+S.%3BLimmatvapirat+C.%3BLimsirichaikul+S.%3BAkkaramongkolporn+P.%3BPiriyaprasarth+S.%3BPatomchaiviwat+V.%3BLimmatvapirat+S.<%2Fauthor><AN>2011194883<%2FAN><DT>Article<%2FDT>)

72.

Current intraoperative imaging techniques to improve surgical resection of laryngeal cancer: A systematic review.

Lauwerends L.J., Galema H.A., Hardillo J.A.U., Sewnaik A., Monserez D., van Driel P.B.A.A., Verhoef C., Baatenburg de Jong R.J., Hilling D.E., Keereweer S.

Cancers. 13(8) (no pagination), 2021. Article Number: 1895. Date of Publication: 02 Apr 2021.

AN: 2006947117

Laryngeal cancer is a prevalent head and neck malignancy, with poor prognosis and low survival rates for patients with advanced disease. Treatment consists of unimodal therapy through surgery or radiotherapy in early staged tumors, while advanced stage tumors are generally treated with multimodal chemoradiotherapy or (total) laryngectomy followed by radiotherapy. Still, the recurrence rate for advanced laryngeal cancer is between 25 and 50%. In order to improve surgical resection of laryngeal cancer and reduce local recurrence rates, various intraoperative optical imaging techniques have been investigated. In this systematic review, we identify these technologies, evaluating the current state and future directions of optical imaging for this indication. Narrow-band imaging (NBI) and autofluorescence (AF) are established tools for early detection of laryngeal cancer. Nonetheless, their intraoperative utility is limited by an intrinsic inability to image beyond the (sub-)mucosa. Likewise, contact endoscopy (CE) and optical coherence tomography (OCT) are technically cumbersome and only useful for mucosal margin assessment. Research on fluorescence imaging (FLI) for this application is sparse, dealing solely with nonspecific fluorescent agents. Evidently, the imaging modalities that have been investigated thus far are generally unsuitable for deep margin assessment. We discuss two optical imaging techniques that can overcome these limitations and suggest how they can be used to achieve adequate margins in laryngeal cancer at all stages.

Copyright © 2021 by the authors. Licensee MDPI, Basel, Switzerland.

Institution

(Lauwerends, Galema, Hardillo, Sewnaik, Monserez, Baatenburg de Jong, Keereweer) Department of Otorhinolaryngology, Head and Neck Surgery, Erasmus MC Cancer Institute, Rotterdam 3015 GD, Netherlands (Galema, Verhoef, Hilling) Department of Surgical Oncology and Gastrointestinal Surgery, Erasmus MC Cancer Institute, Rotterdam 3015 GD, Netherlands

(van Driel) Department of Orthopedic Surgery, Isala Hospital, Zwolle 8025 AB, Netherlands

Publisher

MDPI AG

Emtree Heading

autofluorescence; cancer staging; *cancer surgery; early cancer diagnosis; *fluorescence imaging; human; *image analysis; *intraoperative period; intrinsic mode function; *larynx cancer/di [Diagnosis]; *larynx cancer/su [Surgery]; mucosa; narrow band imaging; optical coherence tomography; Raman spectrometry; review; surgical margin; systematic review; treatment indication; aminolevulinic acid; protoporphyrin; contact endoscopy.

Candidate Terms

contact endoscopy [other term]

Drug Index Terms

aminolevulinic acid; protoporphyrin.

Other Index Terms

autofluorescence; cancer staging; *cancer surgery; early cancer diagnosis; *fluorescence imaging; human; *image analysis; *intraoperative period; intrinsic mode function; *larynx cancer / *diagnosis / *surgery; mucosa; narrow band imaging; optical coherence tomography; Raman spectrometry; Review; surgical margin; systematic review; treatment indication.

Link to the Ovid Full Text or citation:

[Click here for full text options](https://ovidsp.ovid.com/ovidweb.cgi?T=JS&CSC=Y&NEWS=N&PAGE=fulltext&D=emed22&AN=2006947117)

Link to the External Link Resolver:

[SFX](https://sfx-86scu.hosted.exlibrisgroup.com.cn/86scu?sid=OVID:embase&id=pmid:&id=doi:10.3390%2Fcancers13081895&issn=20726694&isbn=&volume=13&issue=8&spage=1895&pages=&date=2021&title=Cancers&atitle=Current+intraoperative+imaging+techniques+to+improve+surgical+resection+of+laryngeal+cancer%3A+A+systematic+review&aulast=Lauwerends&pid=<author>Lauwerends+L.J.%3BGalema+H.A.%3BHardillo+J.A.U.%3BSewnaik+A.%3BMonserez+D.%3Bvan+Driel+P.B.A.A.%3BVerhoef+C.%3BBaatenburg+de+Jong+R.J.%3BHilling+D.E.%3BKeereweer+S.<%2Fauthor><AN>2006947117<%2FAN><DT>Review<%2FDT>)

73.

Identifying benign and malignant thyroid nodules based on blood serum surface-enhanced Raman spectroscopy.

Xia L., Lu J., Chen Z., Cui X., Chen S., Pei D.

Nanomedicine: Nanotechnology, Biology, and Medicine. 32 (no pagination), 2021. Article Number: 102328. Date of Publication: February 2021.

AN: 2010135205

The aim of this study is to evaluate the feasibility of using blood serum surface-enhanced Raman spectroscopy (SERS) to identify benign and malignant thyroid nodules. Blood serum samples collected from three different groups including healthy volunteers (n = 22), patients with benign nodules (n = 19) and malignant nodules (n = 22) were measured by SERS. The spectral analysis results demonstrate that biomolecules in serum, such as amino acids, adenine and nucleic acid bases, change differently due to the different progression of nodules. By further combining with partial least square analysis and linear discriminant analysis (PLS-LDA) method, diagnostic accuracies of 93.65% and 82.93%, sensitivities of 92.68% and 81.82% and specificities of 95.45% and 84.21% can be achieved for differentiating healthy versus thyroid nodular groups and benign versus malignant groups, respectively. The above results have suggested that the blood serum SERS technique is helpful for precise diagnosis and timely treatment for patients with thyroid nodules.

Copyright © 2020 Elsevier Inc.

PMID

33181274 [<https://www.ncbi.nlm.nih.gov/pubmed/?term=33181274>]

Institution

(Xia, Chen, Cui, Chen) College of Medicine and Biological Information Engineering, Northeastern University, Shenyang, China (Lu, Pei) Department of Health Management & Department of Family Medicine, Shengjing Hospital of China Medical University, Shenyang, China

(Cui, Chen) Key Laboratory of Intelligent Computing in Medical Image, Ministry of Education, China

Publisher

Elsevier Inc.

Emtree Heading

adult; amino acid blood level; article; cancer diagnosis; clinical article; controlled study; diagnostic accuracy; discriminant analysis; female; human; human tissue; least square analysis; male; sensitivity and specificity; *surface enhanced Raman spectroscopy; *thyroid cancer/di [Diagnosis]; *thyroid nodule/di [Diagnosis]; adenine/ec [Endogenous Compound]; nucleic acid base/ec [Endogenous Compound]; microscope; microscope slide; HR Evolution.

Candidate Terms

HR Evolution [device term]

Device Index Terms

microscope; microscope slide.

Drug Index Terms

adenine / endogenous compound; nucleic acid base / endogenous compound.

Other Index Terms

adult; amino acid blood level; Article; cancer diagnosis; clinical article; controlled study; diagnostic accuracy; discriminant analysis; female; human; human tissue; least square analysis; male; sensitivity and specificity; *surface enhanced Raman spectroscopy; *thyroid cancer / *diagnosis; *thyroid nodule / *diagnosis.

Link to the Ovid Full Text or citation:

[Click here for full text options](https://ovidsp.ovid.com/ovidweb.cgi?T=JS&CSC=Y&NEWS=N&PAGE=fulltext&D=emed22&AN=2010135205)

Link to the External Link Resolver:

[SFX](https://sfx-86scu.hosted.exlibrisgroup.com.cn/86scu?sid=OVID:embase&id=pmid:33181274&id=doi:10.1016%2Fj.nano.2020.102328&issn=15499634&isbn=&volume=32&issue=&spage=102328&pages=&date=2021&title=Nanomedicine%3A+Nanotechnology%2C+Biology%2C+and+Medicine&atitle=Identifying+benign+and+malignant+thyroid+nodules+based+on+blood+serum+surface-enhanced+Raman+spectroscopy&aulast=Xia&pid=<author>Xia+L.%3BLu+J.%3BChen+Z.%3BCui+X.%3BChen+S.%3BPei+D.<%2Fauthor><AN>2010135205<%2FAN><DT>Article<%2FDT>)

74.

Axon-Myelin Unit Blistering as Early Event in MS Normal Appearing White Matter.

Luchicchi A., Hart B., Frigerio I., van Dam A.-M., Perna L., Offerhaus H.L., Stys P.K., Schenk G.J., Geurts J.J.G.

Annals of Neurology. 89(4) (pp 711-725), 2021. Date of Publication: April 2021.

AN: 2010277030

Objective: Multiple sclerosis (MS) is a chronic neuroinflammatory and neurodegenerative disease of unknown etiology. Although the prevalent view regards a CD4+-lymphocyte autoimmune reaction against myelin at the root of the disease, recent studies propose autoimmunity as a secondary reaction to idiopathic brain damage. To gain knowledge about this possibility we investigated the presence of axonal and myelinic morphological alterations, which could implicate imbalance of axon-myelin units as primary event in MS pathogenesis.

Method(s): Using high resolution imaging histological brain specimens from patients with MS and non-neurological/non-MS controls, we explored molecular changes underpinning imbalanced interaction between axon and myelin in normal appearing white matter (NAWM), a region characterized by normal myelination and absent inflammatory activity.

Result(s): In MS brains, we detected blister-like swellings formed by myelin detachment from axons, which were substantially less frequently retrieved in non-neurological/non-MS controls. Swellings in MS NAWM presented altered glutamate receptor expression, myelin associated glycoprotein (MAG) distribution, and lipid biochemical composition of myelin sheaths. Changes in tethering protein expression, widening of nodes of Ranvier and altered distribution of sodium channels in nodal regions of otherwise normally myelinated axons were also present in MS NAWM. Finally, we demonstrate a significant increase, compared with controls, in citrullinated proteins in myelin of MS cases, pointing toward biochemical modifications that may amplify the immunogenicity of MS myelin.

Interpretation(s): Collectively, the impaired interaction of myelin and axons potentially leads to myelin disintegration. Conceptually, the ensuing release of (post-translationally modified) myelin antigens may elicit a subsequent immune attack in MS. ANN NEUROL 2021;89:711-725.

Copyright © 2021 The Authors. Annals of Neurology published by Wiley Periodicals LLC on behalf of American Neurological Association.

PMID

33410190 [<https://www.ncbi.nlm.nih.gov/pubmed/?term=33410190>]

Author NameID

Luchicchi, Antonio; ORCID: <https://orcid.org/0000-0002-0189-4347> Hart, Bert't; ORCID: <https://orcid.org/0000-0002-0036-5267>

van Dam, Anne-Marie; ORCID: <https://orcid.org/0000-0003-4191-3941>

Offerhaus, Herman L.; ORCID: <https://orcid.org/0000-0003-3697-5750>

Stys, Peter K.; ORCID: <https://orcid.org/0000-0003-0326-4194>

Institution

(Luchicchi, Hart, Frigerio, van Dam, Perna, Schenk, Geurts) Amsterdam UMC, Vrije Universiteit, Department of Anatomy and Neurosciences, Amsterdam Neuroscience, MS Center Amsterdam, Amsterdam, Netherlands (Hart) Department Biomedical Sciences of Cells and Systems, University Medical Center Groningen, Groningen, Netherlands

(Offerhaus) Faculty of Science and Technology, University of Twente, Enschede, Netherlands

(Stys) Cummings School of Medicine, University of Calgary, Calgary, AB, Canada

Publisher

John Wiley and Sons Inc

Emtree Heading

adult; aged; amino acid sequence; antigen retrieval; article; aspiration pneumonia; *axon; biochemical composition; cachexia; chronic obstructive lung disease; clinical article; coherent anti Stokes Raman spectroscopy; controlled study; corpus callosum; female; fluorescence microscopy; heart failure; human; immunohistochemistry; lung carcinoma; male; middle aged; molecular fingerprinting; *multiple sclerosis/et [Etiology]; multispectral imaging; myelin sheath; myelination; nerve fiber degeneration; ovary carcinoma; pancreas carcinoma; pathogenesis; pneumonia; priority journal; protein expression; respiratory failure; sepsis; tongue carcinoma; *white matter; young adult; glutamate receptor/ec [Endogenous Compound]; *myelin/ec [Endogenous Compound]; myelin associated glycoprotein/ec [Endogenous Compound]; n methyl dextro aspartic acid receptor/ec [Endogenous Compound]; sodium azide; sodium channel/ec [Endogenous Compound]; imaging system; microscope.

Device Index Terms

imaging system; microscope.

Drug Index Terms

glutamate receptor / endogenous compound; *myelin / *endogenous compound; myelin associated glycoprotein / endogenous compound; n methyl dextro aspartic acid receptor / endogenous compound; sodium azide; sodium channel / endogenous compound.

Other Index Terms

adult; aged; amino acid sequence; antigen retrieval; Article; aspiration pneumonia; *axon; biochemical composition; cachexia; chronic obstructive lung disease; clinical article; coherent anti Stokes Raman spectroscopy; controlled study; corpus callosum; female; fluorescence microscopy; heart failure; human; immunohistochemistry; lung carcinoma; male; middle aged; molecular fingerprinting; *multiple sclerosis / *etiology; multispectral imaging; myelin sheath; myelination; nerve fiber degeneration; ovary carcinoma; pancreas carcinoma; pathogenesis; pneumonia; priority journal; protein expression; respiratory failure; sepsis; tongue carcinoma; *white matter; young adult.

Link to the Ovid Full Text or citation:

[Click here for full text options](https://ovidsp.ovid.com/ovidweb.cgi?T=JS&CSC=Y&NEWS=N&PAGE=fulltext&D=emed22&AN=2010277030)

Link to the External Link Resolver:

[SFX](https://sfx-86scu.hosted.exlibrisgroup.com.cn/86scu?sid=OVID:embase&id=pmid:33410190&id=doi:10.1002%2Fana.26014&issn=03645134&isbn=&volume=89&issue=4&spage=711&pages=711-725&date=2021&title=Annals+of+Neurology&atitle=Axon-Myelin+Unit+Blistering+as+Early+Event+in+MS+Normal+Appearing+White+Matter&aulast=Luchicchi&pid=<author>Luchicchi+A.%3BHart+B.%3BFrigerio+I.%3Bvan+Dam+A.-M.%3BPerna+L.%3BOfferhaus+H.L.%3BStys+P.K.%3BSchenk+G.J.%3BGeurts+J.J.G.<%2Fauthor><AN>2010277030<%2FAN><DT>Article<%2FDT>)

75.

Optical biopsy of laryngeal lesions using femtosecond multiphoton microscopy.

Zhang H., Chen Y., Cao D., Li W., Jing Y., Zhong H., Liu H., Zhu X.

Biomedical Optics Express. 12(3) (pp 1308-1319), 2021. Date of Publication: 01 Mar 2021.

AN: 2011122079

Laryngeal squamous cell carcinoma (LSCC) is one of the most prevalent malignancy of the upper aerodigestive tract. Detection of early lesions in vivo could improve the survival rate significantly. In this study, we demonstrated that femtosecond multiphoton microscopy (MPM) is an effective tool to visualize the microscopic features within fixed laryngeal tissues, without sectioning, staining, or labeling. Accurate detection of lesions and determination of the tumor grading can be achieved, with excellent consistency with conventional histological examination. These results suggest that MPM may represent a powerful tool for in-vivo or fast ex-vivo diagnosis of laryngeal lesions at the point of care.

Copyright © 2021 Optical Society of America under the terms of the OSA Open Access Publishing Agreement.

Institution

(Zhang, Cao, Li, Jing, Liu) Department of Pathology, Beijing Tongren Hospital, Capital Medical University, Beijing Key Laboratory of Head and Neck Molecular Diagnostic Pathology, Beijing 100730, China (Chen, Zhong, Zhu) Femtosecond Research Center (Guangzhou), A616 80 Lanyue Road, Guangzhou 510663, China

Publisher

The Optical Society

Emtree Heading

angiography; article; confocal microscopy; controlled study; cornea epithelium; ex vivo study; fluorescence imaging; histology; human; human tissue; image analysis; image processing; image segmentation; immunohistochemistry; in vivo study; intestine metaplasia; keratinization; lamina propria; larynx cancer; *larynx injury; *multiphoton microscopy; neoplasm; Raman spectrometry; signal noise ratio; squamous cell carcinoma; survival rate; transmission electron microscopy.

Other Index Terms

angiography; Article; confocal microscopy; controlled study; cornea epithelium; ex vivo study; fluorescence imaging; histology; human; human tissue; image analysis; image processing; image segmentation; immunohistochemistry; in vivo study; intestine metaplasia; keratinization; lamina propria; larynx cancer; *larynx injury; *multiphoton microscopy; neoplasm; Raman spectrometry; signal noise ratio; squamous cell carcinoma; survival rate; transmission electron microscopy.

Link to the Ovid Full Text or citation:

[Click here for full text options](https://ovidsp.ovid.com/ovidweb.cgi?T=JS&CSC=Y&NEWS=N&PAGE=fulltext&D=emed22&AN=2011122079)

Link to the External Link Resolver:

[SFX](https://sfx-86scu.hosted.exlibrisgroup.com.cn/86scu?sid=OVID:embase&id=pmid:&id=doi:10.1364%2FBOE.414931&issn=21567085&isbn=&volume=12&issue=3&spage=1308&pages=1308-1319&date=2021&title=Biomedical+Optics+Express&atitle=Optical+biopsy+of+laryngeal+lesions+using+femtosecond+multiphoton+microscopy&aulast=Zhang&pid=<author>Zhang+H.%3BChen+Y.%3BCao+D.%3BLi+W.%3BJing+Y.%3BZhong+H.%3BLiu+H.%3BZhu+X.<%2Fauthor><AN>2011122079<%2FAN><DT>Article<%2FDT>)

76.

Optical diagnosis of oral cavity lesions by label-free Raman spectroscopy.

Matthies L., Gebrekidan M.T., Tegtmeyer J.F., Oetter N., Rohde M., Vollkommer T., Smeets R., Wilczak W., Stelzle F., Gosau M., Braeuer A.S., Knipfer C.

Biomedical Optics Express. 12(2) (pp 836-851), 2021. Date of Publication: 2021.

AN: 2010961879

Oral squamous cell carcinoma (OSCC) is one of the most prevalent cancers and frequently preceded by non-malignant lesions. Using Shifted-Excitation Raman Difference Spectroscopy (SERDS), principal component and linear discriminant analysis in native tissue specimens, 9500 raw Raman spectra of OSCC, 4300 of non-malignant lesions and 4200 of physiological mucosa were evaluated. Non-malignant lesions were distinguished from physiological mucosa with a classification accuracy of 95.3% (95.4% sensitivity, 95.2% specificity, area under the curve (AUC) 0.99). Discriminating OSCC from non-malignant lesions showed an accuracy of 88.4% (93.7% sensitivity, 76.7% specificity, AUC 0.93). OSCC was identified against physiological mucosa with an accuracy of 89.8% (93.7% sensitivity, 81.0% specificity, AUC 0.90). These findings underline the potential of SERDS for the diagnosis of oral cavity lesions.

Copyright © 2021 Optical Society of America.

Institution

(Matthies, Tegtmeyer, Vollkommer, Smeets, Gosau, Knipfer) University Medical Center Hamburg-Eppendorf (UKE), Department of Oral and Maxillofacial Surgery, Martinistrase 52, Hamburg D-20246, Germany (Gebrekidan, Oetter, Stelzle) Friedrich-Alexander-Universitat Erlangen-Nurnberg (FAU), Erlangen Graduate School in Advanced Optical Technologies (SAOT), Paul-Gordan-Strase 6, Erlangen D-91054, Germany

(Gebrekidan, Braeuer) Technische Universitat Bergakademie Freiberg (TUBAF), Institute of Thermal-Environmental- and Resources' Process Engineering (ITUN), Leipziger Strase 28, Freiberg D-09599, Germany

(Oetter, Rohde, Stelzle) Friedrich-Alexander-Universitat Erlangen-Nurnberg (FAU), Department of Oral and Maxillofacial Surgery, Gluckstrase 11, Erlangen D-91054, Germany

(Wilczak) University Medical Center Hamburg-Eppendorf (UKE), Institute of Pathology, Martinistrase 52, Hamburg D-20246, Germany

Publisher

The Optical Society

Emtree Heading

alveolar ridge; article; autofluorescence; biometry; clinical article; controlled study; diagnostic accuracy; diagnostic test accuracy study; follow up; Fourier transform; histopathology; human; human tissue; hyperkeratosis; infrared spectroscopy; leukoplakia; local field potential; molecular imaging; mouth cavity; *mouth squamous cell carcinoma/di [Diagnosis]; mucosa; optical coherence tomography; *Raman spectrometry; receiver operating characteristic; sensitivity and specificity; signal noise ratio; spectral sensitivity; spectroscopy; squamous cell carcinoma; uterus myoma; light emitting diode; sensor; *shifted excitation Raman difference spectroscopy.

Candidate Terms

*shifted excitation Raman difference spectroscopy [other term]

Device Index Terms

light emitting diode; sensor.

Other Index Terms

alveolar ridge; Article; autofluorescence; biometry; clinical article; controlled study; diagnostic accuracy; diagnostic test accuracy study; follow up; Fourier transform; histopathology; human; human tissue; hyperkeratosis; infrared spectroscopy; leukoplakia; local field potential; molecular imaging; mouth cavity; *mouth squamous cell carcinoma / *diagnosis; mucosa; optical coherence tomography; *Raman spectrometry; receiver operating characteristic; sensitivity and specificity; signal noise ratio; spectral sensitivity; spectroscopy; squamous cell carcinoma; uterus myoma.

Link to the Ovid Full Text or citation:

[Click here for full text options](https://ovidsp.ovid.com/ovidweb.cgi?T=JS&CSC=Y&NEWS=N&PAGE=fulltext&D=emed22&AN=2010961879)

Link to the External Link Resolver:

[SFX](https://sfx-86scu.hosted.exlibrisgroup.com.cn/86scu?sid=OVID:embase&id=pmid:&id=doi:10.1364%2FBOE.409456&issn=21567085&isbn=&volume=12&issue=2&spage=836&pages=836-851&date=2021&title=Biomedical+Optics+Express&atitle=Optical+diagnosis+of+oral+cavity+lesions+by+label-free+Raman+spectroscopy&aulast=Matthies&pid=<author>Matthies+L.%3BGebrekidan+M.T.%3BTegtmeyer+J.F.%3BOetter+N.%3BRohde+M.%3BVollkommer+T.%3BSmeets+R.%3BWilczak+W.%3BStelzle+F.%3BGosau+M.%3BBraeuer+A.S.%3BKnipfer+C.<%2Fauthor><AN>2010961879<%2FAN><DT>Article<%2FDT>)

77.

Chitosan modified nitrogen-doped porous carbon composite as a highly-efficient adsorbent for phenolic pollutants removal.

Liu Y., Li L., Duan Z., You Q., Liao G., Wang D.

Colloids and Surfaces A: Physicochemical and Engineering Aspects. 610 (no pagination), 2021. Article Number: 125728. Date of Publication: 05 Feb 2021.

AN: 2008378282

In this work, a chitosan modified nitrogen-doped porous carbon composite (CS-NPC) with abundant micropore and mesopore was prepared by the hydrothermal carbonization combined with chemical activation, and used as an adsorbent for phenolic pollutants removal. The CS-NPC composite were characterized by the field emission scanning electron microscopy (FE-SEM), N2 adsorption-desorption curves, X-ray photoelectron spectrum (XPS), X-ray diffraction (XRD) and Raman. It was found that the resulting carbon material owned large specific surface areas (2189.88 m2 g-1) and total pore volume (1.123 cm3 g-1), and its micropore and mesopore volume was 0.494 and 0.629 cm3 g-1, respectively. Batch adsorption experiments were carried out to study the impact of various factors like solution pH value, contact time and ionic intensity. The adsorption process can be described by the pseudo-second-order kinetic model and Langmuir adsorption isotherm model. And at 298 K, the adsorption capability of the CS-NPC composite for phenol, BPA and 2,4-DCP was 254.45, 675.68 and 892.86 mg g-1, respectively, which was much higher than that of previously reported carbon-based materials due to its own high specific surface areas, abundant functional groups ([sbnd] NH2, -OH) and porous structure. The adsorbent still remained excellent regeneration after five cycles. And the CS-NPC composite can be regarded as a broad-spectrum adsorbent toward other organic pollutants including methyl orange, methylene blue and tetracycline. This study developed a novel, low-cost and green porous carbon composite which was combined with the advantage of both phenolic resin and CS, and the CS-NPC would be an outstanding adsorbent for the removal of various organic contaminants from wastewater.

Copyright © 2020 Elsevier B.V.

Institution

(Liu, Duan, Liao) Engineering Research Center of Nano-Geomaterials of Ministry of Education, Faculty of Material Science and Chemistry, China University of Geosciences, Wuhan, Hubei 430074, China (Li, Wang) School of Environmental Studies, China University of Geosciences, Wuhan, Hubei 430074, China

(You) Key Laboratory of Optoelectronic Chemical Materials and Devices, Ministry of Education, School of Chemical and Environmental Engineering, Jianghan University, Wuhan, Hubei 430056, China

(Wang) State Key Laboratory of Environmental Aquatic Chemistry, Research Center for Co-Environmental Sciences, Chinese Academy of Sciences, Beijing 100085, China

Publisher

Elsevier B.V.

Emtree Heading

*adsorption; article; carbonization; chemical structure; contact time; controlled study; desorption; field emission scanning electron microscopy; ionic strength; isotherm; *organic pollution; *persistent organic pollutant; pH; physical chemistry; pore volume; porosity; priority journal; Raman spectrometry; surface area; *waste component removal; *waste water management; X ray photoemission spectroscopy; X ray powder diffraction; 2,4 dichlorophenol; 4,4' isopropylidenediphenol; *adsorbent; ammonia; *carbon; *chitosan; functional group; hydroxyl group; methyl orange; methylene blue; *nanocomposite; *nitrogen; phenol; *phenol derivative; resin; tetracycline; chemical analyzer; membrane filter; scanning electron microscope; X ray film; Langmuir adsorption isotherm model; F8 Focus Powder XRD; Sirion 200.

Candidate Terms

Langmuir adsorption isotherm model [other term] F8 Focus Powder XRD [device term]

Sirion 200 [device term]

Device Index Terms

chemical analyzer; membrane filter; scanning electron microscope; X ray film.

Drug Index Terms

2,4 dichlorophenol; 4,4' isopropylidenediphenol; *adsorbent; ammonia; *carbon; *chitosan; functional group; hydroxyl group; methyl orange; methylene blue; *nanocomposite; *nitrogen; phenol; *phenol derivative; resin; tetracycline.

Other Index Terms

*adsorption; Article; carbonization; chemical structure; contact time; controlled study; desorption; field emission scanning electron microscopy; ionic strength; isotherm; *organic pollution; *persistent organic pollutant; pH; physical chemistry; pore volume; porosity; priority journal; Raman spectrometry; surface area; *waste component removal; *waste water management; X ray photoemission spectroscopy; X ray powder diffraction.

Link to the Ovid Full Text or citation:

[Click here for full text options](https://ovidsp.ovid.com/ovidweb.cgi?T=JS&CSC=Y&NEWS=N&PAGE=fulltext&D=emed22&AN=2008378282)

Link to the External Link Resolver:

[SFX](https://sfx-86scu.hosted.exlibrisgroup.com.cn/86scu?sid=OVID:embase&id=pmid:&id=doi:10.1016%2Fj.colsurfa.2020.125728&issn=09277757&isbn=&volume=610&issue=&spage=125728&pages=&date=2021&title=Colloids+and+Surfaces+A%3A+Physicochemical+and+Engineering+Aspects&atitle=Chitosan+modified+nitrogen-doped+porous+carbon+composite+as+a+highly-efficient+adsorbent+for+phenolic+pollutants+removal&aulast=Liu&pid=<author>Liu+Y.%3BLi+L.%3BDuan+Z.%3BYou+Q.%3BLiao+G.%3BWang+D.<%2Fauthor><AN>2008378282<%2FAN><DT>Article<%2FDT>)

78.

Specimen-driven intraoperative assessment of resection margins should be standard of care for oral cancer patients.

Aaboubout Y., ten Hove I., Smits R.W.H., Hardillo J.A., Puppels G.J., Koljenovic S.

Oral Diseases. 27(1) (pp 111-116), 2021. Date of Publication: January 2021.

AN: 2006140277

With an incidence of 350.000 new cases per year, cancer of the oral cavity ranks among the 10 most common solid organ cancers. Most of these cancers are squamous cell carcinomas. Five-year survival is about 50%. It has been shown that clear resection margins (>5 mm healthy tissue surrounding the resected tumor) have a significant positive effect on locoregional control and survival. It is not uncommon that the resection margins of oral tumors are inadequate. However, when providing the surgeon with intraoperative feedback on the resection margin status, it is expected that obtaining adequate resection margins is improved. In this respect, it has been shown that specimen-driven intraoperative assessment of resection margins is superior to defect-driven intraoperative assessment of resection margins. In this concise report, it is described how a specimen-driven approach can increase the rate of adequate resections of oral cavity squamous cell carcinoma as well as that it is discussed how intraoperative assessment can be further improved with regard to the surgical treatment of oral cavity squamous cell carcinoma.

Copyright © 2020 The Authors. Oral Diseases published by John Wiley & Sons Ltd

PMID

32816373 [<https://www.ncbi.nlm.nih.gov/pubmed/?term=32816373>]

Author NameID

Koljenovic, Senada; ORCID: <https://orcid.org/0000-0002-5185-3455>

Institution

(Aaboubout, Koljenovic) Depatment of Pathology, Erasmus MC, University Medical Center Rotterdam, Rotterdam, Netherlands (Aaboubout, Smits, Hardillo) Department of Otorhinolaryngology and Head and Neck Surgery, Erasmus MC, University Medical Center Rotterdam, Rotterdam, Netherlands

(ten Hove) Department of Oral and Maxillofacial Surgery, Erasmus MC, University Medical Center Rotterdam, Rotterdam, Netherlands

(ten Hove) Department of Oral and Maxillofacial Surgery, LUMC, Leiden University Medical Center, Rotterdam, Netherlands

(Puppels) Department of Dermatology, Erasmus MC, University Medical Center Rotterdam, Rotterdam, Netherlands

Publisher

Blackwell Publishing Ltd

Emtree Heading

cancer patient; cancer surgery; cancer tissue; frozen section; *health care quality; human; *intraoperative period; *mouth squamous cell carcinoma/su [Surgery]; *oral surgery; priority journal; Raman spectrometry; review; *surgical margin.

Other Index Terms

cancer patient; cancer surgery; cancer tissue; frozen section; *health care quality; human; *intraoperative period; *mouth squamous cell carcinoma / *surgery; *oral surgery; priority journal; Raman spectrometry; Review; *surgical margin.

Link to the Ovid Full Text or citation:

[Click here for full text options](https://ovidsp.ovid.com/ovidweb.cgi?T=JS&CSC=Y&NEWS=N&PAGE=fulltext&D=emed22&AN=2006140277)

Link to the External Link Resolver:

[SFX](https://sfx-86scu.hosted.exlibrisgroup.com.cn/86scu?sid=OVID:embase&id=pmid:32816373&id=doi:10.1111%2Fodi.13619&issn=1354523X&isbn=&volume=27&issue=1&spage=111&pages=111-116&date=2021&title=Oral+Diseases&atitle=Specimen-driven+intraoperative+assessment+of+resection+margins+should+be+standard+of+care+for+oral+cancer+patients&aulast=Aaboubout&pid=<author>Aaboubout+Y.%3Bten+Hove+I.%3BSmits+R.W.H.%3BHardillo+J.A.%3BPuppels+G.J.%3BKoljenovic+S.<%2Fauthor><AN>2006140277<%2FAN><DT>Review<%2FDT>)

79.

Salivary Raman Spectroscopy: Standardization of Sampling Protocols and Stratification of Healthy and Oral Cancer Subjects.

Hole A., Tyagi G., Deshmukh A., Deshpande R., Gota V., Chaturvedi P., Krishna C.M.

Applied spectroscopy. 75(5) (pp 581-588), 2021. Date of Publication: 01 May 2021.

AN: 633278953

Minimally invasive cancer detection using bio-fluids has been actively pursued due to practical limitations, though there are better suited noninvasive and online in vivo methods. Saliva is one such clinically informative bio-fluid that offers the advantages of easy and multiple sample collection. Despite its potential in cancer diagnostics, saliva analysis is challenging due to its heterogeneous composition. Recently, there has been an upsurge in saliva exploration using optical techniques. Forms of saliva such as precipitate and supernatant have been monitored, but this sampling method needs to be standardized due to the obvious loss of analytes in processing. In that context, present work details the comparison of four different saliva sampling methodologies, i.e., air-dried, lyophilized, pellet, and supernatant using Raman spectroscopy collected from 10 healthy samples. Composition-driven spectral features of all forms were compared and classified using principal component analysis and linear discriminant analysis. Analysis was carried out on all four groups in the first step. In the second step, groups of pellet and supernatant , and air-dried and lyophilized were analyzed. Findings suggest that pellet and supernatant exhibit discrete spectroscopic features and demonstrate high classification efficiency, which is indicative of their distinctive biochemical composition. On the other hand, air-dried and lyophilized forms showed overlapping spectral features and low classification, suggesting these forms retain majority spectroscopic features of whole saliva and are less prone to sampling losses. Thus, this study indicates air-dried and lyophilized forms may be more appropriate for saliva sampling using Raman spectroscopy providing the comprehensive information required for cancer diagnosis. Furthermore, the method was also tested for the classification of oral cancer and healthy subjects (n=27) which yielded 90% stratification. The findings of the study indicate the utility of minimally invasive salivary Raman-based diagnostics in oral cancers.

PMID

33107759 [<https://www.ncbi.nlm.nih.gov/pubmed/?term=33107759>]

Author NameID

Krishna, C Murali; ORCID: <https://orcid.org/0000-0002-4974-8533>

Institution

(Hole, Tyagi, Krishna) Chilakapati Laboratory, 29435Advanced Centre for Treatment Research and Education in Cancer, Tata Memorial Centre, Navi Mumbai, India (Deshmukh) Centre for Interdisciplinary Research, D.Y. Patil University, Navi Mumbai, India

(Deshpande, Gota) Clinical Pharmacology Laboratory, 29435Advanced Centre for Treatment Research and Education in Cancer, Tata Memorial Centre, Navi Mumbai, India

(Gota, Chaturvedi, Krishna) Homi Bhabha National Institute, Training School Complex, India

(Chaturvedi) Department of Surgical Oncology, Tata Memorial Hospital, Mumbai, India

Publisher

NLM (Medline)

Emtree Heading

discriminant analysis; human; *mouth tumor/di [Diagnosis]; *Raman spectrometry; saliva; standard.

Other Index Terms

discriminant analysis; human; *mouth tumor / *diagnosis; *Raman spectrometry; saliva; standard.

Link to the Ovid Full Text or citation:

[Click here for full text options](https://ovidsp.ovid.com/ovidweb.cgi?T=JS&CSC=Y&NEWS=N&PAGE=fulltext&D=emed22&AN=633278953)

Link to the External Link Resolver:

[SFX](https://sfx-86scu.hosted.exlibrisgroup.com.cn/86scu?sid=OVID:embase&id=pmid:33107759&id=doi:10.1177%2F0003702820973260&issn=19433530&isbn=&volume=75&issue=5&spage=581&pages=581-588&date=2021&title=Applied+spectroscopy&atitle=Salivary+Raman+Spectroscopy%3A+Standardization+of+Sampling+Protocols+and+Stratification+of+Healthy+and+Oral+Cancer+Subjects&aulast=Hole&pid=<author>Hole+A.%3BTyagi+G.%3BDeshmukh+A.%3BDeshpande+R.%3BGota+V.%3BChaturvedi+P.%3BKrishna+C.M.<%2Fauthor><AN>633278953<%2FAN><DT>Article<%2FDT>)

80.

Single cell detection using intracellularly-grown-Au-nanoparticle based surface-enhanced Raman scattering spectroscopy for nasopharyngeal cell line classification.

Chen W., Xu S., Wang X., Wei G., Hong Q., Huang H., Yu Y.

Analytical methods : advancing methods and applications. 13(28) (pp 3147-3153), 2021. Date of Publication: 28 Jul 2021.

AN: 635431046

The aim of this study was to evaluate the feasibility of applying intracellularly-grown-Au-nanoparticle (IGAuNP)-based surface-enhanced Raman scattering (SERS) technology to classify two types of nasopharyngeal cancer (NPC) cell lines (CNE2 and CNE1). The IGAuNP technology provides excellent delivery efficiency of Au NPs to the cytoplasm and nucleus, thus leading to an extraordinary enhancement of the Raman signals of cells. Compared with normal Raman scattering (NRS) spectra of cells, IGAuNP-based SERS spectra not only have a high signal-to-noise ratio, but also can detect more characteristic Raman peaks, which can be used to explore more differences when comparing the biochemical components of different nasopharyngeal carcinoma cell lines. Based on the linear discriminant analysis (LDA) and support vector machine (SVM) analysis of SERS spectral data, an exciting result with a diagnostic sensitivity of 100%, specificity of 100%, and accuracy of 100%, could be achieved to differentiate CNE2 and CNE1 cells, which is better than the result obtained by NRS spectroscopy. This exploratory study indicated that the SERS technology based on IGAuNPs in conjunction with multivariate statistical analysis methods has great potential in the identification of nasopharyngeal carcinoma cell lines.

PMID

34159968 [<https://www.ncbi.nlm.nih.gov/pubmed/?term=34159968>]

Institution

(Chen) College of Integrated Traditional Chinese and Western Medicine, Fujian University of Traditional Chinese Medicine, Fuzhou 350122, China

Publisher

NLM (Medline)

Emtree Heading

cell line; human; nasopharynx carcinoma/di [Diagnosis]; *nasopharynx tumor/di [Diagnosis]; Raman spectrometry; *nanoparticle.

Drug Index Terms

*nanoparticle.

Other Index Terms

cell line; human; nasopharynx carcinoma / diagnosis; *nasopharynx tumor / *diagnosis; Raman spectrometry.

Link to the Ovid Full Text or citation:

[Click here for full text options](https://ovidsp.ovid.com/ovidweb.cgi?T=JS&CSC=Y&NEWS=N&PAGE=fulltext&D=emed22&AN=635431046)

Link to the External Link Resolver:

[SFX](https://sfx-86scu.hosted.exlibrisgroup.com.cn/86scu?sid=OVID:embase&id=pmid:34159968&id=doi:10.1039%2Fd1ay00554e&issn=17599679&isbn=&volume=13&issue=28&spage=3147&pages=3147-3153&date=2021&title=Analytical+methods+%3A+advancing+methods+and+applications&atitle=Single+cell+detection+using+intracellularly-grown-Au-nanoparticle+based+surface-enhanced+Raman+scattering+spectroscopy+for+nasopharyngeal+cell+line+classification&aulast=Chen&pid=<author>Chen+W.%3BXu+S.%3BWang+X.%3BWei+G.%3BHong+Q.%3BHuang+H.%3BYu+Y.<%2Fauthor><AN>635431046<%2FAN><DT>Article<%2FDT>)

81.

Label-free electrochemical immunosensor based on gold nanoparticle/polyethyleneimine/reduced graphene oxide nanocomposites for the ultrasensitive detection of cancer biomarker matrix metalloproteinase-1.

Liu X., Lin L.-Y., Tseng F.-Y., Tan Y.-C., Li J., Feng L., Song L., Lai C.-F., Li X., He J.-H., Sakthivel R., Chung R.-J.

The Analyst. 146(12) (pp 4066-4079), 2021. Date of Publication: 14 Jun 2021.

AN: 635194360

Matrix metalloproteinase-1 (MMP-1) is associated with many types of cancers, including oral, colorectal, and brain cancers. This paper describes the fabrication of an MMP-1 immunosensor based on a gold nanoparticle/polyethyleneimine/reduced graphene oxide (AuNP/PEI/rGO)-modified disposable screen-printed electrode (SPE). A microwave-assisted single-step method was employed for the simultaneous reduction of gold and graphene oxide in a PEI environment to avoid AuNP agglomeration. The crystal structure, chemical composition, optical properties, and interior morphology of the materials were probed by X-ray diffraction, Raman spectroscopy, UV-visible spectrometry, and transmission electron microscopy techniques. To assemble a label-free MMP-1 immunosensor layer-by-layer, 3-mercaptopropionic acid was utilized due to its strong sulfur-gold bonding ability, and its tail end was attached to a carboxyl group, allowing the MMP-1 antibody (anti-MMP-1) to be subsequently cross-linked using the traditional N-(3-dimethylaminopropyl) and N' ethylcarbodiimide hydrochloride method. Differential pulse voltammetry analysis showed a linear relationship with MMP-1 concentration in the range of 1-50 ng ml-1 with an R2 value of ~0.996 (n = 5, RSD < 5%). This immunosensor was successfully applied for MMP-1 detection in urine, saliva, bovine serum, and cell culture media (HSC-3 & C6) of oral and brain cancers showing results comparable to those of the credible ELISA method.

PMID

34048512 [<https://www.ncbi.nlm.nih.gov/pubmed/?term=34048512>]

Author NameID

Chung, Ren-Jei; ORCID: <https://orcid.org/0000-0002-0655-3680>

Institution

(Liu) College of Materials Science and Engineering, Shenzhen University, Shenzhen 518060, China. lxh@szu.edu.cn and Department of Electrical and Computer Engineering, National University of Singapore, Singapore 117583, Singapore (Lin, Tseng, Tan, Sakthivel) Department of Chemical Engineering and Biotechnology, National Taipei University of Technology (Taipei Tech), Taipei 10608, Taiwan (Republic of China)

(Li, Feng, Li) College of Materials Science and Engineering, Shenzhen University, Shenzhen 518060, China

(Song) Research Center of Guangdong Intelligent Charging and System Integration Engineering Technology, Ltd, Shenzhen Winsemi Microelectronics Co., Shenzhen 518000, China

(Lai) DFON Biomedical Technology Inc., Taipei 10608, Taiwan (Republic of China)

(He) Department of Chemical Engineering and Biotechnology, National Taipei University of Technology (Taipei Tech), Taiwan. and Department of Materials Science and Engineering, City University of Hong Kong, Hong Kong, Taipei 10608, Taiwan (Republic of China)

(Chung) Department of Chemical Engineering and Biotechnology, National Taipei University of Technology (Taipei Tech), Taipei 10608, Taiwan (Republic of China)

Publisher

NLM (Medline)

Emtree Heading

animal; bovine; electrochemical analysis; electrode; *genetic procedures; immunoassay; limit of detection; *neoplasm; gold; graphene oxide; *graphite; interstitial collagenase; *metal nanoparticle; *nanocomposite; polyethyleneimine; tumor marker.

Drug Index Terms

gold; graphene oxide; *graphite; interstitial collagenase; *metal nanoparticle; *nanocomposite; polyethyleneimine; tumor marker.

Other Index Terms

animal; bovine; electrochemical analysis; electrode; *genetic procedures; immunoassay; limit of detection; *neoplasm.

Link to the Ovid Full Text or citation:

[Click here for full text options](https://ovidsp.ovid.com/ovidweb.cgi?T=JS&CSC=Y&NEWS=N&PAGE=fulltext&D=emed22&AN=635194360)

Link to the External Link Resolver:

[SFX](https://sfx-86scu.hosted.exlibrisgroup.com.cn/86scu?sid=OVID:embase&id=pmid:34048512&id=doi:10.1039%2Fd1an00537e&issn=13645528&isbn=&volume=146&issue=12&spage=4066&pages=4066-4079&date=2021&title=The+Analyst&atitle=Label-free+electrochemical+immunosensor+based+on+gold+nanoparticle%2Fpolyethyleneimine%2Freduced+graphene+oxide+nanocomposites+for+the+ultrasensitive+detection+of+cancer+biomarker+matrix+metalloproteinase-1&aulast=Liu&pid=<author>Liu+X.%3BLin+L.-Y.%3BTseng+F.-Y.%3BTan+Y.-C.%3BLi+J.%3BFeng+L.%3BSong+L.%3BLai+C.-F.%3BLi+X.%3BHe+J.-H.%3BSakthivel+R.%3BChung+R.-J.<%2Fauthor><AN>635194360<%2FAN><DT>Article<%2FDT>)

82.

Spectroscopic, quantum chemical and molecular docking studies on 1-amino-5-chloroanthraquinone: A targeted drug therapy for thyroid cancer.

Valarmathi T., Premkumar R., Meera M.R., Milton Franklin Benial A.

Spectrochimica acta. Part A, Molecular and biomolecular spectroscopy. 255 (pp 119659), 2021. Date of Publication: 05 Jul 2021.

AN: 634636688

The DFT studies of the 1-Amino-5-chloro-anthraquinone (ACAQ) molecule have been carried out with extensive and accurate investigations of detailed vibrational and spectroscopic investigations and validated by experimentally. The optimized molecular structure and harmonic resonance frequencies were computed based on DFT/B3LYP method with 6-311G++(d,p) basis set using the Gaussian 09 program. The experimental and calculated vibrational wavenumbers were assigned on the basis of PED calculations using VEDA 4.0 program. The 13C NMR isotropic chemical shifts of the molecule were calculated using Gauge-Invariant-Atomic Orbital (GIAO) method in DMSO solution and compared with the experimental data. The absorption spectrum of the molecule was computed in liquid phase (ethanol), which exhibits to * electronic transition and compared with observed UV-Vis spectrum. Frontier molecular orbitals analysis shows the molecular reactivity and kinetic stability of the molecule. The Mulliken atomic charge distribution and molecular electrostatic potential surface analysis of the molecule validate the reactive site of the molecule. The natural bond orbital analysis proves the bioactivity of the molecule. Molecular docking analysis indicate that ACAQ molecule inhibits the action of c-Met Kinase protein, which is associated with the thyroid cancer. Hence, the present study pave the way for the development of novel drugs in the treatment of thyroid cancer.

Copyright © 2021 Elsevier B.V. All rights reserved.

PMID

33751957 [<https://www.ncbi.nlm.nih.gov/pubmed/?term=33751957>]

Institution

(Valarmathi, Premkumar, Milton Franklin Benial) P.G. and Research Department of Physics, N.M.S.S.V.N. College, Madurai, Tamil Nadu 625019, India (Meera) Department of Physics, Sree Ayyappa College for Women, Tamil Nadu, India

Publisher

NLM (Medline)

Emtree Heading

conformation; human; infrared spectroscopy; molecular docking; molecular model; quantum theory; Raman spectrometry; thermodynamics; *thyroid tumor; ultraviolet spectrophotometry; *drug.

Drug Index Terms

*drug.

Other Index Terms

conformation; human; infrared spectroscopy; molecular docking; molecular model; quantum theory; Raman spectrometry; thermodynamics; *thyroid tumor; ultraviolet spectrophotometry.

Link to the Ovid Full Text or citation:

[Click here for full text options](https://ovidsp.ovid.com/ovidweb.cgi?T=JS&CSC=Y&NEWS=N&PAGE=fulltext&D=emed22&AN=634636688)

Link to the External Link Resolver:

[SFX](https://sfx-86scu.hosted.exlibrisgroup.com.cn/86scu?sid=OVID:embase&id=pmid:33751957&id=doi:10.1016%2Fj.saa.2021.119659&issn=18733557&isbn=&volume=255&issue=&spage=119659&pages=119659&date=2021&title=Spectrochimica+acta.+Part+A%2C+Molecular+and+biomolecular+spectroscopy&atitle=Spectroscopic%2C+quantum+chemical+and+molecular+docking+studies+on+1-amino-5-chloroanthraquinone%3A+A+targeted+drug+therapy+for+thyroid+cancer&aulast=Valarmathi&pid=<author>Valarmathi+T.%3BPremkumar+R.%3BMeera+M.R.%3BMilton+Franklin+Benial+A.<%2Fauthor><AN>634636688<%2FAN><DT>Article<%2FDT>)

83.

Biomedical applications of vibrational spectroscopy: Oral cancer diagnostics.

Byrne H.J., Behl I., Calado G., Ibrahim O., Toner M., Galvin S., Healy C.M., Flint S., Lyng F.M.

Spectrochimica acta. Part A, Molecular and biomolecular spectroscopy. 252 (pp 119470), 2021. Date of Publication: 05 May 2021.

AN: 634139843

Vibrational spectroscopy, based on either infrared absorption or Raman scattering, has attracted increasing attention for biomedical applications. Proof of concept explorations for diagnosis of oral potentially malignant disorders and cancer are reviewed, and recent advances critically appraised. Specific examples of applications of Raman microspectroscopy for analysis of histological, cytological and saliva samples are presented for illustrative purposes, and the future prospects, ultimately for routine, chairside in vivo screening are discussed.

Copyright © 2021 Elsevier B.V. All rights reserved.

PMID

33503511 [<https://www.ncbi.nlm.nih.gov/pubmed/?term=33503511>]

Institution

(Byrne) FOCAS Research Institute, Technological University Dublin, City Campus, Dublin 8, Ireland (Behl, Calado, Lyng) School of Physics and Clinical and Optometric Sciences, Technological University Dublin, City Campus, Dublin 8, Ireland; Radiation and Environmental Science Centre, FOCAS Research Institute, Technological University Dublin, City Campus, Dublin 8, Ireland

(Ibrahim) School of Dental Science, Trinity College Dublin, Lincoln Place, Dublin 2, Ireland

(Toner) Central Pathology Laboratory, St. James Hospital, James Street, Dublin 8, Ireland

(Galvin, Healy, Flint) Oral Medicine Unit, Dublin Dental University Hospital, Trinity College Dublin, Lincoln Place, Dublin 2, Ireland

Publisher

NLM (Medline)

Emtree Heading

human; *mouth tumor/di [Diagnosis]; *Raman spectrometry; vibration.

Other Index Terms

human; *mouth tumor / *diagnosis; *Raman spectrometry; vibration.

Link to the Ovid Full Text or citation:

[Click here for full text options](https://ovidsp.ovid.com/ovidweb.cgi?T=JS&CSC=Y&NEWS=N&PAGE=fulltext&D=emed22&AN=634139843)

Link to the External Link Resolver:

[SFX](https://sfx-86scu.hosted.exlibrisgroup.com.cn/86scu?sid=OVID:embase&id=pmid:33503511&id=doi:10.1016%2Fj.saa.2021.119470&issn=18733557&isbn=&volume=252&issue=&spage=119470&pages=119470&date=2021&title=Spectrochimica+acta.+Part+A%2C+Molecular+and+biomolecular+spectroscopy&atitle=Biomedical+applications+of+vibrational+spectroscopy%3A+Oral+cancer+diagnostics&aulast=Byrne&pid=<author>Byrne+H.J.%3BBehl+I.%3BCalado+G.%3BIbrahim+O.%3BToner+M.%3BGalvin+S.%3BHealy+C.M.%3BFlint+S.%3BLyng+F.M.<%2Fauthor><AN>634139843<%2FAN><DT>Review<%2FDT>)

84.

Rapid and noninvasive diagnosis of oral and oropharyngeal cancer based on micro-Raman and FT-IR spectra of saliva.

Falamas A., Faur C.I., Ciupe S., Chirila M., Rotaru H., Hedesiu M., Cinta Pinzaru S.

Spectrochimica acta. Part A, Molecular and biomolecular spectroscopy. 252 (pp 119477), 2021. Date of Publication: 05 May 2021.

AN: 634209717

Fast, sensitive, and noninvasive techniques are needed for better health care management, particularly when traditional biopsies could be replaced with appropriate analyses of body fluids, such as saliva. Here is presented a proof-of-concept study, which aims to test a recently developed saliva samples preparation method, for oral and oropharyngeal cancer diagnosis, using micro-Raman and Fourier transform infrared (FT-IR) spectroscopic techniques. The detected biomarker bands and the cancer classification rates are compared and discussed. Saliva samples were collected from healthy donors and pathologically confirmed oral and oropharyngeal cancer patients. Principal components analysis (PCA) and principal components analysis-linear discriminant analysis (PCA-LDA) chemometric methods were applied to build discrimination models for the test and control groups. Based on the differences between salivary spectra of healthy and cancer patients, several biomarker bands were identified. Noteworthy, a significant vibrational biomarker band at 2064cm-1, assigned to thiocyanate, was observed in both the FT-IR and Raman data-set. Other cancer characteristic Raman bands were 754cm-1 (tryptophan), 530 and 927cm-1 (lysozyme), 1001cm-1 (phenylalanine), while the FT-IR biomarker band was located at 1075cm-1 (phosphodiester bonds stretching in DNA, RNA). The oral and oropharyngeal cancer was classified with an accuracy of 90% based on the micro-Raman data and 82% based on the FT-IR data set, respectively. The study showed that oral and oropharyngeal cancer can be differentiated from control saliva samples based on their respective micro-Raman and FT-IR spectral signatures, due to the biomolecular modifications induced by the disease.

Copyright © 2021 Elsevier B.V. All rights reserved.

PMID

33545509 [<https://www.ncbi.nlm.nih.gov/pubmed/?term=33545509>]

Institution

(Falamas, Ciupe) Molecular and Biomolecular Physics, National Institute for Research and Development of Isotopic and Molecular Technologies, Cluj-Napoca, Romania (Faur, Rotaru, Hedesiu) Department of Maxillofacial Surgery and Radiology, "Iuliu Hatieganu" University of Medicine and Pharmacy, Cluj-Napoca, Romania

(Chirila) Department of ENT, "Iuliu Hatieganu" University of Medicine and Pharmacy, Cluj-Napoca, Romania

(Cinta Pinzaru) Biomolecular Physics Department, Faculty of Physics, Babes-Bolyai University, Cluj-Napoca, Romania

Publisher

NLM (Medline)

Emtree Heading

discriminant analysis; Fourier analysis; human; *infrared spectroscopy; *oropharynx tumor/di [Diagnosis]; Raman spectrometry; *saliva.

Other Index Terms

discriminant analysis; Fourier analysis; human; *infrared spectroscopy; *oropharynx tumor / *diagnosis; Raman spectrometry; *saliva.

Link to the Ovid Full Text or citation:

[Click here for full text options](https://ovidsp.ovid.com/ovidweb.cgi?T=JS&CSC=Y&NEWS=N&PAGE=fulltext&D=emed22&AN=634209717)

Link to the External Link Resolver:

[SFX](https://sfx-86scu.hosted.exlibrisgroup.com.cn/86scu?sid=OVID:embase&id=pmid:33545509&id=doi:10.1016%2Fj.saa.2021.119477&issn=18733557&isbn=&volume=252&issue=&spage=119477&pages=119477&date=2021&title=Spectrochimica+acta.+Part+A%2C+Molecular+and+biomolecular+spectroscopy&atitle=Rapid+and+noninvasive+diagnosis+of+oral+and+oropharyngeal+cancer+based+on+micro-Raman+and+FT-IR+spectra+of+saliva&aulast=Falamas&pid=<author>Falamas+A.%3BFaur+C.I.%3BCiupe+S.%3BChirila+M.%3BRotaru+H.%3BHedesiu+M.%3BCinta+Pinzaru+S.<%2Fauthor><AN>634209717<%2FAN><DT>Article<%2FDT>)

85.

Centimeter-scale gas-sieving nanoporous single-layer graphene membrane.

Lee W.-C., Bondaz L., Huang S., He G., Dakhchoune M., Agrawal K.V.

Journal of Membrane Science. 618 (no pagination), 2021. Article Number: 118745. Date of Publication: 15 January 2021.

AN: 2007973956

High-permeance, molecular-sieving, nanoporous single-layer graphene (NSLG) membranes are highly promising for gas separation. However, the formation of cracks during the transfer of NSLG to a low-cost porous support is difficult to avoid. These cracks are detrimental to gas selectivity, and therefore, make the scale-up of the gas-sieving NSLG membranes challenging. To mitigate the crack formation on low-cost macroporous supports, herein, we demonstrate mechanical reinforcement of the graphene film with a two-layer composite carbon film. The bottom layer of the composite film is a 100-nm-thick block-copolymer film derived nanoporous carbon (NPC) film with a pore size of 20-30 nm. This layer makes an intimate contact with NSLG and prevents generation of crack. However, the NPC film by itself is not robust enough to cover the rough surface of low-cost macroporous supports and tends to generate occasional cracks. This is prevented by spin-coating a 500-nm-thick multi-walled carbon nanotube (MWNT) film, hosting pore size of 200-300 nm, on top of the NPC film. This imparts enough mechanical strength to NSLG/NPC film to be successfully suspended on a low-cost, macroporous, nonwoven metal wire mesh on a centimeter-scale while completely avoiding cracks. As a result, H2/CH4 and H2/CO2 selectivities of 11-23 and 5-8, respectively, higher than the corresponding Knudsen selectivities of 2.8 and 4.7, respectively, are obtained from the centimeter-scale NSLG membranes. The reinforced membranes are mechanically robust and can successfully withstand transmembrane pressure difference of 4 bar. When the MWNT film is directly coated on NSLG without using the intermediate NPC layer, the gas sieving behavior is not observed, likely due to the development of nanoscale cracks. This underlines the crucial role of the hierarchical pore structure in the composite carbon film in realizing the gas-sieving graphene membranes.

Copyright © 2020 The Author(s)

Author NameID

Bondaz, Luc; ORCID: <https://orcid.org/0000-0002-0675-0289>

Institution

(Lee, Bondaz, Huang, He, Dakhchoune, Agrawal) Laboratory of Advanced Separations, Ecole Polytechnique Federale de Lausanne, Sion, Switzerland

Publisher

Elsevier B.V.

Emtree Heading

article; chemical vapor deposition; concentration (parameter); cost; *gas; gas permeability; gas transport; *material state; mechanics; molecular mechanics; *nanofabrication; phase separation; pore size; pressure; priority journal; Raman spectrometry; scale up; scanning electron microscopy; spin coating; strength; surface property; transmission electron microscopy; carbon dioxide; copolymer; *graphene; hydrogen; methane; multi walled nanotube; nanocoating; nanocomposite; nanofilm; stainless steel; unclassified drug; crack; low pressure chemical vapor deposition; *molecular sieving; *nanoporous single layer graphene; poly(styrene b 4 vinyl pyridine).

Candidate Terms

crack [other term] low pressure chemical vapor deposition [other term]

*molecular sieving [other term]

*nanoporous single layer graphene [drug term]

poly(styrene b 4 vinyl pyridine) [drug term]

Drug Index Terms

carbon dioxide; copolymer; *graphene; hydrogen; methane; multi walled nanotube; nanocoating; nanocomposite; nanofilm; stainless steel; unclassified drug.

Other Index Terms

Article; chemical vapor deposition; concentration (parameter); cost; *gas; gas permeability; gas transport; *material state; mechanics; molecular mechanics; *nanofabrication; phase separation; pore size; pressure; priority journal; Raman spectrometry; scale up; scanning electron microscopy; spin coating; strength; surface property; transmission electron microscopy.

Link to the Ovid Full Text or citation:

[Click here for full text options](https://ovidsp.ovid.com/ovidweb.cgi?T=JS&CSC=Y&NEWS=N&PAGE=fulltext&D=emed22&AN=2007973956)

Link to the External Link Resolver:

[SFX](https://sfx-86scu.hosted.exlibrisgroup.com.cn/86scu?sid=OVID:embase&id=pmid:&id=doi:10.1016%2Fj.memsci.2020.118745&issn=03767388&isbn=&volume=618&issue=&spage=118745&pages=&date=2021&title=Journal+of+Membrane+Science&atitle=Centimeter-scale+gas-sieving+nanoporous+single-layer+graphene+membrane&aulast=Lee&pid=<author>Lee+W.-C.%3BBondaz+L.%3BHuang+S.%3BHe+G.%3BDakhchoune+M.%3BAgrawal+K.V.<%2Fauthor><AN>2007973956<%2FAN><DT>Article<%2FDT>)

86.

Erratum: Assessment of radiotherapy effect for nasopharyngeal cancer using plasma surface-enhanced Raman spectroscopy technology (Biomedical Optics Express (2018) 9 (3413) DOI: 10.1364/BOE.9.003413).

Wu Q., Qiu S., Yu Y., Chen W., Lin H., Lin D., Feng S., Chen R.

Biomedical Optics Express. 12(5) (pp 2557-2558), 2021. Date of Publication: May 2021.

AN: 2011856866

The authors regret that in the original manuscript the TEM image of Ag nanoparticles was accidentally misused in Fig. 1 in [1]. The correct Fig. 1 is shown below. The authors apologize for this error and any inconvenience to readers. (Figure Presented).

Copyright © 2021 OSA - The Optical Society. All rights reserved.

Institution

(Wu, Yu, Lin, Lin, Feng, Chen) Fujian Normal University, Key Laboratory of OptoElectronic Science and Technology for Medicine, Ministry of Education, Fujian Provincial Key Laboratory for Photonics Technology, Fuzhou 350007, China (Qiu) Department of Radiation Oncology, Fujian Provincial Cancer Hospital, Fujian Medical University Cancer Hospital, Fujian Provincial Key Laboratory of Translational Cancer Medicine, Fuzhou 350014, China

(Yu, Chen, Lin) College of Integrated Traditional Chinese and Western Medicine, Fujian University of Traditional Chinese Medicine, Fuzhou 350122, China

Publisher

The Optical Society

Emtree Heading

*erratum.

Other Index Terms

*erratum.

Link to the Ovid Full Text or citation:

[Click here for full text options](https://ovidsp.ovid.com/ovidweb.cgi?T=JS&CSC=Y&NEWS=N&PAGE=fulltext&D=emed22&AN=2011856866)

Link to the External Link Resolver:

[SFX](https://sfx-86scu.hosted.exlibrisgroup.com.cn/86scu?sid=OVID:embase&id=pmid:&id=doi:10.1364%2FBOE.426301&issn=21567085&isbn=&volume=12&issue=5&spage=2557&pages=2557-2558&date=2021&title=Biomedical+Optics+Express&atitle=Erratum%3A+Assessment+of+radiotherapy+effect+for+nasopharyngeal+cancer+using+plasma+surface-enhanced+Raman+spectroscopy+technology+(Biomedical+Optics+Express+(2018)+9+(3413)+DOI%3A+10.1364%2FBOE.9.003413)&aulast=Wu&pid=<author>Wu+Q.%3BQiu+S.%3BYu+Y.%3BChen+W.%3BLin+H.%3BLin+D.%3BFeng+S.%3BChen+R.<%2Fauthor><AN>2011856866<%2FAN><DT>Erratum<%2FDT>)

adult; cytology; female; human; male; middle aged; mouth; pathology; pilot study; *Raman spectrometry; receiver operating characteristic.

Link to the Ovid Full Text or citation:

[Click here for full text options](https://ovidsp.ovid.com/ovidweb.cgi?T=JS&CSC=Y&NEWS=N&PAGE=fulltext&D=emed15&AN=606344553)

Link to the External Link Resolver:

[SFX](https://sfx-86scu.hosted.exlibrisgroup.com.cn/86scu?sid=OVID:embase&id=pmid:23821433&id=doi:10.1002%2Fjbio.201300030&issn=18640648&isbn=&volume=7&issue=9&spage=690&pages=690-702&date=2014&title=Journal+of+biophotonics&atitle=In+vivo+Raman+spectroscopy+for+detection+of+oral+neoplasia%3A+a+pilot+clinical+study&aulast=Krishna&pid=<author>Krishna+H.%3BMajumder+S.K.%3BChaturvedi+P.%3BSidramesh+M.%3BGupta+P.K.<%2Fauthor><AN>606344553<%2FAN><DT>Article<%2FDT>)

283.

Raman mapping of oral buccal mucosa: a spectral histopathology approach.

Behl I., Kukreja L., Deshmukh A., Singh S.P., Mamgain H., Hole A.R., Krishna C.M.

Journal of biomedical optics. 19(12) (pp 126005), 2014. Date of Publication: 01 Dec 2014.

AN: 605431243

Oral cancer is one of the most common cancers worldwide. One-fifth of the world's oral cancer subjects are from India and other South Asian countries. The present Raman mapping study was carried out to understand biochemical variations in normal and malignant oral buccal mucosa. Data were acquired using WITec alpha 300R instrument from 10 normal and 10 tumors unstained tissue sections. Raman maps of normal sections could resolve the layers of epithelium, i.e. basal, intermediate, and superficial. Inflammatory, tumor, and stromal regions are distinctly depicted on Raman maps of tumor sections. Mean and difference spectra of basal and inflammatory cells suggest abundance of DNA and carotenoids features. Strong cytochrome bands are observed in intermediate layers of normal and stromal regions of tumor. Epithelium and stromal regions of normal cells are classified by principal component analysis. Classification among cellular components of normal and tumor sections is also observed. Thus, the findings of the study further support the applicability of Raman mapping for providing molecular level insights in normal and malignant conditions.

PMID

25478870 [<https://www.ncbi.nlm.nih.gov/pubmed/?term=25478870>]

Institution

(Behl) Chilakapati Lab, ACTREC, Kharghar, Navi-Mumbai 410210, India (Kukreja) Chilakapati Lab, ACTREC, Kharghar, Navi-Mumbai 410210, India

(Deshmukh) Chilakapati Lab, ACTREC, Kharghar, Navi-Mumbai 410210, India

(Singh) Chilakapati Lab, ACTREC, Kharghar, Navi-Mumbai 410210, India

(Mamgain) WITec GmbH, Lisemeitner-str.6, D-89081 Ulm, Germany

(Hole) Chilakapati Lab, ACTREC, Kharghar, Navi-Mumbai 410210, India

(Krishna) Chilakapati Lab, ACTREC, Kharghar, Navi-Mumbai 410210, India

Emtree Heading

*chemistry; cytochemistry; human; mouth mucosa; mouth tumor; *pathology; principal component analysis; *procedures; Raman spectrometry.

Other Index Terms

*chemistry; cytochemistry; human; mouth mucosa; mouth tumor; *pathology; principal component analysis; *procedures; Raman spectrometry.

Link to the Ovid Full Text or citation:

[Click here for full text options](https://ovidsp.ovid.com/ovidweb.cgi?T=JS&CSC=Y&NEWS=N&PAGE=fulltext&D=emed15&AN=605431243)

Link to the External Link Resolver:

[SFX](https://sfx-86scu.hosted.exlibrisgroup.com.cn/86scu?sid=OVID:embase&id=pmid:25478870&id=doi:10.1117%2F1.JBO.19.12.126005&issn=15602281&isbn=&volume=19&issue=12&spage=126005&pages=126005&date=2014&title=Journal+of+biomedical+optics&atitle=Raman+mapping+of+oral+buccal+mucosa%3A+a+spectral+histopathology+approach&aulast=Behl&pid=<author>Behl+I.%3BKukreja+L.%3BDeshmukh+A.%3BSingh+S.P.%3BMamgain+H.%3BHole+A.R.%3BKrishna+C.M.<%2Fauthor><AN>605431243<%2FAN><DT>Article<%2FDT>)

284.

A new nanotechnology technique for determining drug efficacy using targeted plasmonically enhanced single cell imaging spectroscopy.

Austin L.A., Kang B., El-Sayed M.A.

Journal of the American Chemical Society. 135(12) (pp 4688-4691), 2013. Date of Publication: 27 Mar 2013.

AN: 368642476

Recently, we described a new technique, targeted plasmonically enhanced single cell imaging spectroscopy (T-PESCIS), which exploits the plasmonic properties of gold nanoparticles, e.g. gold nanospheres, to simultaneously obtain enhanced intracellular Raman molecular spectra and enhanced Rayleigh cell scattering images throughout the entire span of a single cell cycle. In the present work, we demonstrate the use of T-PESCIS in evaluating the relative efficacy and dynamics of two popular chemotherapy drugs on human oral squamous carcinoma (HSC-3) cells. T-PESCIS revealed three plasmonically enhanced Raman scattering vibration bands, 500, 1000, and 1585 cm-1, associated with the cellular death dynamics. Detailed analysis indicated that the decrease in the 500 cm-1 band did not correlate well with drug efficacy but could indicate death initiation. The time it takes for the relative intensity of either the 1000 or 1585 cm-1 band ("SERS death" bands) to appear and increase to its maximum value after the injection of a known concentration of the drug can be related to the drug's efficacy. The inverse ratio, termed cell death enhancement factor, of these characteristic death times when using either band, especially the spectrally sharp band at 1000 cm -1, gave the correct drug efficacy ratio as determined by the commonly used XTT cell viability assay method. These results strongly suggest the potential future use of this technique in determining the efficacy, dynamics, and molecular mechanisms of various drugs against different diseases. © 2013 American Chemical Society.

PMID

23469948 [<https://www.ncbi.nlm.nih.gov/pubmed/?term=23469948>]

Institution

(Austin, Kang, El-Sayed) Laser Dynamics Laboratory, School of Chemistry and Biochemistry, Georgia Institute of Technology, Atlanta, GA 30332-0400, United States (Kang) College of Material Science and Technology, Nanjing University of Aeronautics and Astronautics, Nanjing 210016, China

Publisher

American Chemical Society (2540 Olentangy River Road, P.O. Box 3337, Columbus OH 43210-3337, United States)

Emtree Heading

article; cell death; cell viability; concentration (parameters); drug determination; drug efficacy; drug targeting; human; *nanotechnology; Raman spectrometry; *spectroscopy; squamous cell carcinoma; cisplatin; fluorouracil; *targeted plasmonically enhanced single cell imaging spectroscopy.

Candidate Terms

*targeted plasmonically enhanced single cell imaging spectroscopy [other term]

Drug Index Terms

cisplatin; fluorouracil.

Other Index Terms

article; cell death; cell viability; concentration (parameters); drug determination; drug efficacy; drug targeting; human; *nanotechnology; Raman spectrometry; *spectroscopy; squamous cell carcinoma.

Link to the Ovid Full Text or citation:

[Click here for full text options](https://ovidsp.ovid.com/ovidweb.cgi?T=JS&CSC=Y&NEWS=N&PAGE=fulltext&D=emed14&AN=368642476)

Link to the External Link Resolver:

[SFX](https://sfx-86scu.hosted.exlibrisgroup.com.cn/86scu?sid=OVID:embase&id=pmid:23469948&id=doi:10.1021%2Fja4011145&issn=00027863&isbn=&volume=135&issue=12&spage=4688&pages=4688-4691&date=2013&title=Journal+of+the+American+Chemical+Society&atitle=A+new+nanotechnology+technique+for+determining+drug+efficacy+using+targeted+plasmonically+enhanced+single+cell+imaging+spectroscopy&aulast=Austin&pid=<author>Austin+L.A.%3BKang+B.%3BEl-Sayed+M.A.<%2Fauthor><AN>368642476<%2FAN><DT>Article<%2FDT>)

285.

Raman spectroscopy demonstrates Amifostine induced preservation of bone mineralization patterns in the irradiated murine mandible.

Tchanque-Fossuo C.N., Gong B., Poushanchi B., Donneys A., Sarhaddi D., Gallagher K.K., Deshpande S.S., Goldstein S.A., Morris M.D., Buchman S.R.

Bone. 52(2) (pp 712-717), 2013. Date of Publication: February 2013.

AN: 52337028

Purpose: Adjuvant radiotherapy in the management of head and neck cancer remains severely debilitating. Fortunately, newly developed agents aimed at decreasing radiation-induced damage have shown great promise. Amifostine (AMF) is a compound, which confers radio-protection to the exposed normal tissues, such as bone. Our intent is to utilize Raman spectroscopy to demonstrate how AMF preserves the mineral composition of the murine mandible following human equivalent radiation.

Method(s): Sprague Dawley rats were randomized into 3 experimental groups: control (n = 5), XRT (n = 5), and AMF-XRT (n = 5). Both XRT and AMF groups underwent bioequivalent radiation of 70. Gy in 5 fractions to the left hemimandible. AMF-XRT received Amifostine prior to radiation. Fifty-six days post-radiation, the hemimandibles were harvested, and Raman spectra were taken in the region of interest spanning 2. mm behind the last molar. Bone mineral and matrix-specific Raman bands were analyzed using one-way ANOVA, with statistical significance at p. <. 0.05.

Result(s): The full-width at half-maximum of the primary phosphate band (FWHM) and the ratio of carbonate/phosphate intensities demonstrated significant differences between AMF-XRT versus XRT (p. <. 0.01) and XRT versus control (p. <. 0.01). There was no difference between AMF-XRT and control (p. >. 0.05) in both Raman metrics. Computer-aided spectral subtraction further confirmed these results where AMF-XRT was spectrally similar to the control. Interestingly, the collagen cross-link ratio did not differ between XRT and AMF-XRT (p. <. 0.01) but was significantly different from the control (p. <. 0.01).

Conclusion(s): Our novel findings demonstrate that AMF prophylaxis maintains and protects bone mineral quality in the setting of radiation. Raman spectroscopy is an emerging and exceptionally attractive clinical translational technology to investigate and monitor both the destructive effects of radiation and the therapeutic remediation of AMF on the structural, physical and chemical qualities of bone. © 2012 Elsevier Inc.

PMID

22885239 [<https://www.ncbi.nlm.nih.gov/pubmed/?term=22885239>]

Institution

(Tchanque-Fossuo, Poushanchi, Donneys, Sarhaddi, Deshpande, Buchman) University of Michigan Hospital and Health Systems, Pediatric Plastic Surgery Section, 1540 E. Hospital Drive, MI 48109, United States (Gong, Morris) University of Michigan Hospital and Health Systems, Department of Chemistry, 930 N. University, Ann Arbor, MI 48109, United States

(Gallagher) University of Michigan Hospital and Health Systems, Department of Otolaryngology-Head and Neck Surgery, University of Michigan Medical School, 1500 E. Medical Center Drive, Ann Arbor, MI 48109, United States

(Goldstein) University of Michigan, Department of Orthopaedic Surgery, A. Alfred Taubman Biomedical Science Research Building, 109 Zina Pitcher Pl, Ann Arbor, MI, 48109, United States

Publisher

Elsevier Inc. (360 Park Avenue South, New York NY 10010, United States)

Emtree Heading

animal experiment; animal tissue; article; bone mineral; *bone mineralization; bone strength; bone structure; controlled study; diode laser; drug mechanism; intermethod comparison; male; *mandible; microscope; musculoskeletal system parameters; nonhuman; physical chemistry; protein cross linking; radiation dose; radiation protection; radiological parameters; *Raman spectrometry; randomization; rat; statistical significance; *tissue preservation; *amifostine/pd [Pharmacology]; *amifostine/sc [Subcutaneous Drug Administration]; carbonic acid; collagen; phosphate; bone quality.

Candidate Terms

bone quality [other term]

Drug Index Terms

*amifostine / *pharmacology / *subcutaneous drug administration; carbonic acid; collagen; phosphate.

Other Index Terms

animal experiment; animal tissue; article; bone mineral; *bone mineralization; bone strength; bone structure; controlled study; diode laser; drug mechanism; intermethod comparison; male; *mandible; microscope; musculoskeletal system parameters; nonhuman; physical chemistry; protein cross linking; radiation dose; radiation protection; radiological parameters; *Raman spectrometry; randomization; rat; statistical significance; *tissue preservation.

Drug Trade Name

ethyol: Medimmune [United States]

Link to the Ovid Full Text or citation:

[Click here for full text options](https://ovidsp.ovid.com/ovidweb.cgi?T=JS&CSC=Y&NEWS=N&PAGE=fulltext&D=emed14&AN=52337028)

Link to the External Link Resolver:

[SFX](https://sfx-86scu.hosted.exlibrisgroup.com.cn/86scu?sid=OVID:embase&id=pmid:22885239&id=doi:10.1016%2Fj.bone.2012.07.029&issn=87563282&isbn=&volume=52&issue=2&spage=712&pages=712-717&date=2013&title=Bone&atitle=Raman+spectroscopy+demonstrates+Amifostine+induced+preservation+of+bone+mineralization+patterns+in+the+irradiated+murine+mandible&aulast=Tchanque-Fossuo&pid=<author>Tchanque-Fossuo+C.N.%3BGong+B.%3BPoushanchi+B.%3BDonneys+A.%3BSarhaddi+D.%3BGallagher+K.K.%3BDeshpande+S.S.%3BGoldstein+S.A.%3BMorris+M.D.%3BBuchman+S.R.<%2Fauthor><AN>52337028<%2FAN><DT>Article<%2FDT>)

286.

Raman spectral analysis of nasopharyngeal carcinoma cell line CNE2 after microwave radiation.

Ye Y., Chen Y., Su Y., Zou C., Huang Y., Ou L., Chen R.

Biochemistry and Cell Biology. 91(2) (pp 67-71), 2013. Date of Publication: April 2013.

AN: 368653757

This study aimed to study the effects of microwave radiation on the nasopharyngeal carcinoma cell line CNE2 by Raman spectroscopy. The cells were separated into a control group and radiated groups with radiation times of 2, 5, 10, and 25 min, respectively. Both principal components analysis and support vector machine were employed for statistical analysis of Raman spectra. The results show that the relative content of C-H deformation and amide I begin to change when the radiation time is over 10 min, and principal components analysis further confirms there are significant differences after 10 min of radiation. Moreover, support vector machine is simultaneously used to classify radiated samples from control samples. The classification accuracy is low until the radiation time reaches over 10 min. In conclusion, this study reveals the Raman spectral characteristics of CNE2 under different microwave radiation exposure timesand demonstrates Raman spectroscopy can be a potential method to explore cellular characterization after radiation. The final results may help in elucidating the mechanism by which microwave radiation interacts with tumor cells. © 2013 Published by NRC Research Press.

PMID

23527634 [<https://www.ncbi.nlm.nih.gov/pubmed/?term=23527634>]

Institution

(Ye) College of Physics and Information, Fuzhou University, Fuzhou 350002, Fujian, China (Ye, Chen, Ou, Chen) Zhicheng College, Fuzhou University, Fuzhou 350002, Fujian, China

(Chen) Key Laboratory of Optoelectronic Science and Technology for Medicine, Ministry of Education, Fujian Normal University, Fuzhou 350007, Fujian, China

(Su, Zou) Fujian Provincial Tumor Hospital, Fuzhou 350014, Fujian, China

(Huang) Key Laboratory of Instrumentation Science and Dynamic Measurement (North University of China), Ministry of Education, North University of China, Taiyuan 030051, Shanxi, China

(Ye) No. 50, Yangqiao West Road, Gulou Area, Fuzhou, China

Publisher

National Research Council of Canada (Buiding M 55, Ottawa ONT K1A 0R6, Canada)

Emtree Heading

accuracy; article; cancer cell culture; controlled study; human; human cell; *microwave radiation; *nasopharynx carcinoma; principal component analysis; radiation exposure; *Raman spectrometry; statistical analysis; support vector machine; amide; carbon; hydrogen.

Drug Index Terms

amide; carbon; hydrogen.

Other Index Terms

accuracy; article; cancer cell culture; controlled study; human; human cell; *microwave radiation; *nasopharynx carcinoma; principal component analysis; radiation exposure; *Raman spectrometry; statistical analysis; support vector machine.

Link to the Ovid Full Text or citation:

[Click here for full text options](https://ovidsp.ovid.com/ovidweb.cgi?T=JS&CSC=Y&NEWS=N&PAGE=fulltext&D=emed14&AN=368653757)

Link to the External Link Resolver:

[SFX](https://sfx-86scu.hosted.exlibrisgroup.com.cn/86scu?sid=OVID:embase&id=pmid:23527634&id=doi:10.1139%2Fbcb-2012-0040&issn=08298211&isbn=&volume=91&issue=2&spage=67&pages=67-71&date=2013&title=Biochemistry+and+Cell+Biology&atitle=Raman+spectral+analysis+of+nasopharyngeal+carcinoma+cell+line+CNE2+after+microwave+radiation&aulast=Ye&pid=<author>Ye+Y.%3BChen+Y.%3BSu+Y.%3BZou+C.%3BHuang+Y.%3BOu+L.%3BChen+R.<%2Fauthor><AN>368653757<%2FAN><DT>Article<%2FDT>)

287.

Recent advancements in the diagnosis of oral premalignant and malignant lesions: A comprehensive review.

Gupta M., Aggarwal A., Ahuja R.

Clinical Cancer Investigation Journal. 2(3) (pp 181-184), 2013. Date of Publication: July-September 2013.

AN: 370127939

The diagnosis and treatment of lesions are currently based on histopathology, which is the gold standard for the diagnosis of cancer and dysplasia at the molecular level. Recently, there has been an increasing trend of optical spectroscopy methods for the detection of oral premalignant and malignant lesions and the same is highlighted in this paper. It depends on the optical spectrum derived from any tissue that contains information about the histological and biochemical make-up of that tissue. It provides tissue diagnosis in real-time, non-invasively, and in situ.

Institution

(Gupta) Department of Oral Medicine and Radiology, Shree Bankey Bihari Dental College and Research Centre, Ghaziabad, Uttar Pradesh, India (Gupta) Department of Oral Medicine and Radiology, Rishiraj College of Dental Sciences and Research Centre, Bhopal, Madhya Pradesh, India

(Aggarwal) Department of Oral Medicine and Radiology, Rajasthan Dental College, Jaipur, Rajasthan, India

(Ahuja) Department of Oral Medicine and Radiology, Kalka Dental College Hospital and Research Centre, Meerut, Uttar Pradesh, India

Publisher

Medknow Publications and Media Pvt. Ltd (B9, Kanara Business Centre, off Link Road, Ghatkopar (E), Mumbai 400 075, India)

Emtree Heading

antigen binding; autofluorescence; cancer prognosis; chromosome translocation; chronic myeloid leukemia; cytopathology; diagnostic test accuracy study; DNA microarray; DNA sequence; DNA strand; electrochemical impedance spectroscopy; flow cytometry; fluorescence; genetic transcription; histopathology; human; immunocytochemistry; immunohistochemistry; keratinocyte; malignant transformation; *mouth cancer/di [Diagnosis]; mouth squamous cell carcinoma/di [Diagnosis]; non invasive measurement; nuclear magnetic resonance spectroscopy; optical coherence tomography; optical resolution; oxygenation; photodynamic therapy; polymerase chain reaction; *precancer/di [Diagnosis]; priority journal; Raman spectrometry; review; RNA probe; signal transduction; T cell lymphoma; tumor suppressor gene; collagen/ec [Endogenous Compound]; elastin/ec [Endogenous Compound]; photosensitizing agent; protoporphyrin/ec [Endogenous Compound]; reduced nicotinamide adenine dinucleotide/ec [Endogenous Compound].

Drug Index Terms

collagen / endogenous compound; elastin / endogenous compound; photosensitizing agent; protoporphyrin / endogenous compound; reduced nicotinamide adenine dinucleotide / endogenous compound.

Other Index Terms

antigen binding; autofluorescence; cancer prognosis; chromosome translocation; chronic myeloid leukemia; cytopathology; diagnostic test accuracy study; DNA microarray; DNA sequence; DNA strand; electrochemical impedance spectroscopy; flow cytometry; fluorescence; genetic transcription; histopathology; human; immunocytochemistry; immunohistochemistry; keratinocyte; malignant transformation; *mouth cancer / *diagnosis; mouth squamous cell carcinoma / diagnosis; non invasive measurement; nuclear magnetic resonance spectroscopy; optical coherence tomography; optical resolution; oxygenation; photodynamic therapy; polymerase chain reaction; *precancer / *diagnosis; priority journal; Raman spectrometry; review; RNA probe; signal transduction; T cell lymphoma; tumor suppressor gene.

Link to the Ovid Full Text or citation:

[Click here for full text options](https://ovidsp.ovid.com/ovidweb.cgi?T=JS&CSC=Y&NEWS=N&PAGE=fulltext&D=emed14&AN=370127939)

Link to the External Link Resolver:

[SFX](https://sfx-86scu.hosted.exlibrisgroup.com.cn/86scu?sid=OVID:embase&id=pmid:&id=doi:10.4103%2F2278-0513.119249&issn=22780513&isbn=&volume=2&issue=3&spage=181&pages=181-184&date=2013&title=Clinical+Cancer+Investigation+Journal&atitle=Recent+advancements+in+the+diagnosis+of+oral+premalignant+and+malignant+lesions%3A+A+comprehensive+review&aulast=Gupta&pid=<author>Gupta+M.%3BAggarwal+A.%3BAhuja+R.<%2Fauthor><AN>370127939<%2FAN><DT>Review<%2FDT>)

288.

Optical techniques for the intraoperative assessment of nodal status.

Grootendorst D.J., Steenbergen W., Manohar S., Ruers T.J.M.

Future Oncology. 9(11) (pp 1741-1755), 2013. Date of Publication: November 2013.

AN: 370211030
[truncated: 369,055 more chars]
